# Supplementary material for: A new lineage nomenclature to aid genomic surveillance of dengue virus
Source: bioRxiv or medRxiv preprint supplement (doi:10.1101/2024.05.16.24307504), 2024-05-17
Supplement: Supplementary file [file media-3.pdf]

|                                                                                                                                                                                                                                                                                                                                                                                                                                                                                                                                                                                                                                                                                                                                                                                                                                                                                                                                                                                                                                                                                                                                                            |                                                                                          |                                                                                          |                                                                                                                                                                                  |
|------------------------------------------------------------------------------------------------------------------------------------------------------------------------------------------------------------------------------------------------------------------------------------------------------------------------------------------------------------------------------------------------------------------------------------------------------------------------------------------------------------------------------------------------------------------------------------------------------------------------------------------------------------------------------------------------------------------------------------------------------------------------------------------------------------------------------------------------------------------------------------------------------------------------------------------------------------------------------------------------------------------------------------------------------------------------------------------------------------------------------------------------------------|------------------------------------------------------------------------------------------|------------------------------------------------------------------------------------------|----------------------------------------------------------------------------------------------------------------------------------------------------------------------------------|
| EPI_ISL_13154917<br>EPI_ISL_13167664                                                                                                                                                                                                                                                                                                                                                                                                                                                                                                                                                                                                                                                                                                                                                                                                                                                                                                                                                                                                                                                                                                                       | US Naval Medical Research Unit 6<br>Pondicherry Institute of Medical Sciences (PIMS)     | US Naval Medical Research Unit 6<br>Pondicherry Institute of Medical Sciences (PIMS)     | Cruz,C.D., Alba,M., Mores,C., Torre,A.J., Pollet,S. and Leguia,M.<br>Bhat,S., Nair,S., Natarajan,V. and Pandian,B.                                                               |
| EPI_ISL_13168052, EPI_ISL_13168053, EPI_ISL_13168765, EPI_ISL_13168766, EPI_ISL_13168767, EPI_ISL_13168768, EPI_ISL_13168769, EPI_ISL_13168770, EPI_ISL_13168899, EPI_ISL_13168992, EPI_ISL_13169617, EPI_ISL_13169687, EPI_ISL_13169688, EPI_ISL_13169689, EPI_ISL_13169690, EPI_ISL_13169691, EPI_ISL_13170382, EPI_ISL_13170383, EPI_ISL_13172332, EPI_ISL_13172333, EPI_ISL_13172334, EPI_ISL_13172335, EPI_ISL_13172336, EPI_ISL_13172337, EPI_ISL_13172338                                                                                                                                                                                                                                                                                                                                                                                                                                                                                                                                                                                                                                                                                           | King George's Medical University                                                         | King George's Medical University                                                         | Prakash,O., Khan,D.N., Verma,A.K., Ramakrishna,V. and Jain,A.                                                                                                                    |
| see above                                                                                                                                                                                                                                                                                                                                                                                                                                                                                                                                                                                                                                                                                                                                                                                                                                                                                                                                                                                                                                                                                                                                                  | Pondicherry Institute of Medical Sciences (PIMS)                                         | Pondicherry Institute of Medical Sciences (PIMS)                                         | Bhat,S., Nair,S., Natarajan,V. and Pandian,B.                                                                                                                                    |
| EPI_ISL_13198227, EPI_ISL_13198228, EPI_ISL_13198229, EPI_ISL_13198230, EPI_ISL_13198384, EPI_ISL_13198492, EPI_ISL_13199356, EPI_ISL_13199357, EPI_ISL_13199358, EPI_ISL_13199390, EPI_ISL_13199579, EPI_ISL_13199681                                                                                                                                                                                                                                                                                                                                                                                                                                                                                                                                                                                                                                                                                                                                                                                                                                                                                                                                     | Chulalongkorn University, Faculty of Medicine                                            | Chulalongkorn University, Faculty of Medicine                                            | Khongwichit,S., Chuchaona,W., Vongpunsawad,S. and Poorawan,Y.                                                                                                                    |
| see above                                                                                                                                                                                                                                                                                                                                                                                                                                                                                                                                                                                                                                                                                                                                                                                                                                                                                                                                                                                                                                                                                                                                                  | Guangzhou Center for Disease Control and Prevention                                      | Guangzhou Center for Disease Control and Prevention                                      | Su,W., Cao,Y. and Lu,W.                                                                                                                                                          |
| EPI_ISL_13321094, EPI_ISL_13321190, EPI_ISL_13321316, EPI_ISL_13321317, EPI_ISL_13321666, EPI_ISL_13321667, EPI_ISL_13321668, EPI_ISL_13321669, EPI_ISL_13321670, EPI_ISL_13321671, EPI_ISL_13321672, EPI_ISL_13321673, EPI_ISL_13321674, EPI_ISL_13321675, EPI_ISL_13321676, EPI_ISL_13321677, EPI_ISL_13321960, EPI_ISL_13321961, EPI_ISL_13321962, EPI_ISL_13321963, EPI_ISL_13321964, EPI_ISL_13321965, EPI_ISL_13321966, EPI_ISL_13321967, EPI_ISL_13321968, EPI_ISL_13321969, EPI_ISL_13321970, EPI_ISL_13321971, EPI_ISL_13321972, EPI_ISL_13321973, EPI_ISL_13321974, EPI_ISL_13321975, EPI_ISL_13321976, EPI_ISL_13321977, EPI_ISL_13321978, EPI_ISL_13321979, EPI_ISL_13321980, EPI_ISL_13321981, EPI_ISL_13321982, EPI_ISL_13321983, EPI_ISL_13321984, EPI_ISL_13321985, EPI_ISL_13321986, EPI_ISL_13321987, EPI_ISL_13321988, EPI_ISL_13321989, EPI_ISL_13321990, EPI_ISL_13321991, EPI_ISL_13321992, EPI_ISL_13321993, EPI_ISL_13321994, EPI_ISL_13321995, EPI_ISL_13321996, EPI_ISL_13321997, EPI_ISL_13321998, EPI_ISL_13321999, EPI_ISL_13334069, EPI_ISL_13334070, EPI_ISL_13334071, EPI_ISL_13334072, EPI_ISL_13334073, EPI_ISL_13334074 | Guangzhou Center for Disease Control and Prevention                                      | Su,W., Jiang,L. and Lu,W.                                                                |                                                                                                                                                                                  |
| see above                                                                                                                                                                                                                                                                                                                                                                                                                                                                                                                                                                                                                                                                                                                                                                                                                                                                                                                                                                                                                                                                                                                                                  | Guangzhou Center for Disease Control and Prevention                                      | Guangzhou Center for Disease Control and Prevention                                      | Su,W., Cao,Y. and Lu,W.                                                                                                                                                          |
| EPI_ISL_13465463, EPI_ISL_13469902, EPI_ISL_13496557, EPI_ISL_13496558, EPI_ISL_13512178, EPI_ISL_13512179                                                                                                                                                                                                                                                                                                                                                                                                                                                                                                                                                                                                                                                                                                                                                                                                                                                                                                                                                                                                                                                 | Guangzhou Center for Disease Control and Prevention                                      | Guangzhou Center for Disease Control and Prevention                                      | Su,W., Jiang,L. and Lu,W.                                                                                                                                                        |
| EPI_ISL_13512580                                                                                                                                                                                                                                                                                                                                                                                                                                                                                                                                                                                                                                                                                                                                                                                                                                                                                                                                                                                                                                                                                                                                           | Guangzhou Center for Disease Control and Prevention                                      | Guangzhou Center for Disease Control and Prevention                                      | Su,W., Cao,Y. and Lu,W.                                                                                                                                                          |
| EPI_ISL_13531025, EPI_ISL_13531026, EPI_ISL_13531027, EPI_ISL_13531028, EPI_ISL_13531029, EPI_ISL_13531030, EPI_ISL_13531031, EPI_ISL_13531032, EPI_ISL_13531033, EPI_ISL_13531034, EPI_ISL_13531035, EPI_ISL_13531036, EPI_ISL_13531037, EPI_ISL_13531038, EPI_ISL_13531039, EPI_ISL_13531040, EPI_ISL_13531041, EPI_ISL_13531042, EPI_ISL_13531046, EPI_ISL_13531089                                                                                                                                                                                                                                                                                                                                                                                                                                                                                                                                                                                                                                                                                                                                                                                     | Guangzhou Center for Disease Control and Prevention                                      | Guangzhou Center for Disease Control and Prevention                                      | Su,W., Cao,Y. and Lu,W.                                                                                                                                                          |
| see above                                                                                                                                                                                                                                                                                                                                                                                                                                                                                                                                                                                                                                                                                                                                                                                                                                                                                                                                                                                                                                                                                                                                                  | Guangzhou Center for Disease Control and Prevention                                      | Guangzhou Center for Disease Control and Prevention                                      | Su,W., Jiang,L. and Lu,W.                                                                                                                                                        |
| EPI_ISL_13564328, EPI_ISL_13564401                                                                                                                                                                                                                                                                                                                                                                                                                                                                                                                                                                                                                                                                                                                                                                                                                                                                                                                                                                                                                                                                                                                         | Guangzhou Center for Disease Control and Prevention                                      | Guangzhou Center for Disease Control and Prevention                                      | Su,W., Jiang,L. and Lu,W.                                                                                                                                                        |
| EPI_ISL_13564402                                                                                                                                                                                                                                                                                                                                                                                                                                                                                                                                                                                                                                                                                                                                                                                                                                                                                                                                                                                                                                                                                                                                           | Guangzhou Center for Disease Control and Prevention                                      | Guangzhou Center for Disease Control and Prevention                                      | Su,W., Cao,Y. and Lu,W.                                                                                                                                                          |
| EPI_ISL_13564403, EPI_ISL_13564404                                                                                                                                                                                                                                                                                                                                                                                                                                                                                                                                                                                                                                                                                                                                                                                                                                                                                                                                                                                                                                                                                                                         | Guangzhou Center for Disease Control and Prevention                                      | Guangzhou Center for Disease Control and Prevention                                      | Su,W., Jiang,L. and Lu,W.                                                                                                                                                        |
| EPI_ISL_13564405                                                                                                                                                                                                                                                                                                                                                                                                                                                                                                                                                                                                                                                                                                                                                                                                                                                                                                                                                                                                                                                                                                                                           | Guangzhou Center for Disease Control and Prevention                                      | Guangzhou Center for Disease Control and Prevention                                      | Su,W., Cao,Y. and Lu,W.                                                                                                                                                          |
| EPI_ISL_13564406, EPI_ISL_13564407, EPI_ISL_13564408, EPI_ISL_13564409, EPI_ISL_13564410                                                                                                                                                                                                                                                                                                                                                                                                                                                                                                                                                                                                                                                                                                                                                                                                                                                                                                                                                                                                                                                                   | Guangzhou Center for Disease Control and Prevention                                      | Guangzhou Center for Disease Control and Prevention                                      | Su,W., Jiang,L. and Lu,W.                                                                                                                                                        |
| EPI_ISL_13564411                                                                                                                                                                                                                                                                                                                                                                                                                                                                                                                                                                                                                                                                                                                                                                                                                                                                                                                                                                                                                                                                                                                                           | Guangzhou Center for Disease Control and Prevention                                      | Guangzhou Center for Disease Control and Prevention                                      | Su,W., Cao,Y. and Lu,W.                                                                                                                                                          |
| EPI_ISL_13564412, EPI_ISL_13564413, EPI_ISL_13564414                                                                                                                                                                                                                                                                                                                                                                                                                                                                                                                                                                                                                                                                                                                                                                                                                                                                                                                                                                                                                                                                                                       | Guangzhou Center for Disease Control and Prevention                                      | Guangzhou Center for Disease Control and Prevention                                      | Su,W., Jiang,L. and Lu,W.                                                                                                                                                        |
| EPI_ISL_13564415, EPI_ISL_13564416                                                                                                                                                                                                                                                                                                                                                                                                                                                                                                                                                                                                                                                                                                                                                                                                                                                                                                                                                                                                                                                                                                                         | Guangzhou Center for Disease Control and Prevention                                      | Guangzhou Center for Disease Control and Prevention                                      | Su,W., Cao,Y. and Lu,W.                                                                                                                                                          |
| EPI_ISL_13564417                                                                                                                                                                                                                                                                                                                                                                                                                                                                                                                                                                                                                                                                                                                                                                                                                                                                                                                                                                                                                                                                                                                                           | Guangzhou Center for Disease Control and Prevention                                      | Guangzhou Center for Disease Control and Prevention                                      | Su,W., Jiang,L. and Lu,W.                                                                                                                                                        |
| EPI_ISL_13564418                                                                                                                                                                                                                                                                                                                                                                                                                                                                                                                                                                                                                                                                                                                                                                                                                                                                                                                                                                                                                                                                                                                                           | Guangzhou Center for Disease Control and Prevention                                      | Guangzhou Center for Disease Control and Prevention                                      | Su,W., Jiang,L. and Cao,Y.                                                                                                                                                       |
| EPI_ISL_13564419, EPI_ISL_13564420, EPI_ISL_13564421, EPI_ISL_13564422                                                                                                                                                                                                                                                                                                                                                                                                                                                                                                                                                                                                                                                                                                                                                                                                                                                                                                                                                                                                                                                                                     | Guangzhou Center for Disease Control and Prevention                                      | Guangzhou Center for Disease Control and Prevention                                      | Su,W., Jiang,L. and Lu,W.                                                                                                                                                        |
| EPI_ISL_13564423                                                                                                                                                                                                                                                                                                                                                                                                                                                                                                                                                                                                                                                                                                                                                                                                                                                                                                                                                                                                                                                                                                                                           | Guangzhou Center for Disease Control and Prevention                                      | Guangzhou Center for Disease Control and Prevention                                      | Su,W., Cao,Y. and Lu,W.                                                                                                                                                          |
| EPI_ISL_13564424                                                                                                                                                                                                                                                                                                                                                                                                                                                                                                                                                                                                                                                                                                                                                                                                                                                                                                                                                                                                                                                                                                                                           | Guangzhou Center for Disease Control and Prevention                                      | Guangzhou Center for Disease Control and Prevention                                      | Su,W., Jiang,L. and Lu,W.                                                                                                                                                        |
| EPI_ISL_13564625                                                                                                                                                                                                                                                                                                                                                                                                                                                                                                                                                                                                                                                                                                                                                                                                                                                                                                                                                                                                                                                                                                                                           | Guangzhou Center for Disease Control and Prevention                                      | Guangzhou Center for Disease Control and Prevention                                      | Su,W., Jiang,L. and Cao,Y.                                                                                                                                                       |
| EPI_ISL_13564626, EPI_ISL_13564627, EPI_ISL_13564628, EPI_ISL_13564629, EPI_ISL_13564630                                                                                                                                                                                                                                                                                                                                                                                                                                                                                                                                                                                                                                                                                                                                                                                                                                                                                                                                                                                                                                                                   | Guangzhou Center for Disease Control and Prevention                                      | Guangzhou Center for Disease Control and Prevention                                      | Su,W., Jiang,L. and Lu,W.                                                                                                                                                        |
| EPI_ISL_13564631                                                                                                                                                                                                                                                                                                                                                                                                                                                                                                                                                                                                                                                                                                                                                                                                                                                                                                                                                                                                                                                                                                                                           | Guangzhou Center for Disease Control and Prevention                                      | Guangzhou Center for Disease Control and Prevention                                      | Su,W., Cao,Y. and Lu,W.                                                                                                                                                          |
| EPI_ISL_13564632                                                                                                                                                                                                                                                                                                                                                                                                                                                                                                                                                                                                                                                                                                                                                                                                                                                                                                                                                                                                                                                                                                                                           | Guangzhou Center for Disease Control and Prevention                                      | Guangzhou Center for Disease Control and Prevention                                      | Su,W., Jiang,L. and Lu,W.                                                                                                                                                        |
| EPI_ISL_13564633                                                                                                                                                                                                                                                                                                                                                                                                                                                                                                                                                                                                                                                                                                                                                                                                                                                                                                                                                                                                                                                                                                                                           | Haizhu District Center for Disease Control and Prevention                                | Guangdong Center for Disease Control and Prevention                                      | Wu,D., Zhang,H., Zhou,H. and Li,H.                                                                                                                                               |
| EPI_ISL_13564913                                                                                                                                                                                                                                                                                                                                                                                                                                                                                                                                                                                                                                                                                                                                                                                                                                                                                                                                                                                                                                                                                                                                           | Guangzhou Center for Disease Control and Prevention                                      | Guangzhou Center for Disease Control and Prevention                                      | Su,W., Jiang,L. and Lu,W.                                                                                                                                                        |
| EPI_ISL_13564914                                                                                                                                                                                                                                                                                                                                                                                                                                                                                                                                                                                                                                                                                                                                                                                                                                                                                                                                                                                                                                                                                                                                           | Guangzhou Center for Disease Control and Prevention                                      | Guangzhou Center for Disease Control and Prevention                                      | Su,W., Cao,Y. and Lu,W.                                                                                                                                                          |
| EPI_ISL_13565025, EPI_ISL_13566018, EPI_ISL_13566020, EPI_ISL_13570033, EPI_ISL_13570625, EPI_ISL_13573945                                                                                                                                                                                                                                                                                                                                                                                                                                                                                                                                                                                                                                                                                                                                                                                                                                                                                                                                                                                                                                                 | Guangzhou Center for Disease Control and Prevention                                      | Guangzhou Center for Disease Control and Prevention                                      | Su,W., Jiang,L. and Lu,W.                                                                                                                                                        |
| EPI_ISL_13573946                                                                                                                                                                                                                                                                                                                                                                                                                                                                                                                                                                                                                                                                                                                                                                                                                                                                                                                                                                                                                                                                                                                                           | Guangzhou Center for Disease Control and Prevention                                      | Guangzhou Center for Disease Control and Prevention                                      | Su,W., Cao,Y. and Lu,W.                                                                                                                                                          |
| EPI_ISL_13573947, EPI_ISL_13612002                                                                                                                                                                                                                                                                                                                                                                                                                                                                                                                                                                                                                                                                                                                                                                                                                                                                                                                                                                                                                                                                                                                         | Guangzhou Center for Disease Control and Prevention                                      | Guangzhou Center for Disease Control and Prevention                                      | Su,W., Jiang,L. and Lu,W.                                                                                                                                                        |
| EPI_ISL_13631826, EPI_ISL_13631827, EPI_ISL_13632153, EPI_ISL_13632154, EPI_ISL_13632155, EPI_ISL_13632157, EPI_ISL_13632158, EPI_ISL_13632159, EPI_ISL_13632160, EPI_ISL_13632161, EPI_ISL_13632162, EPI_ISL_13632163, EPI_ISL_13632164, EPI_ISL_13632165                                                                                                                                                                                                                                                                                                                                                                                                                                                                                                                                                                                                                                                                                                                                                                                                                                                                                                 | National Institute of Health                                                             | National Institute of Health                                                             | Umair,M., Hakim,R., Bibi,S. and Rehman,Z.                                                                                                                                        |
| see above                                                                                                                                                                                                                                                                                                                                                                                                                                                                                                                                                                                                                                                                                                                                                                                                                                                                                                                                                                                                                                                                                                                                                  | National Institute of Health                                                             | National Institute of Health                                                             | Umair,M., Hakim,R., Bibi,S. and Rehman,Z.                                                                                                                                        |
| EPI_ISL_13632166, EPI_ISL_13632167, EPI_ISL_13632168, EPI_ISL_13632169, EPI_ISL_13632170, EPI_ISL_13632171, EPI_ISL_13632172, EPI_ISL_13632173, EPI_ISL_13632174, EPI_ISL_13632175, EPI_ISL_13632176, EPI_ISL_13632177, EPI_ISL_13632178, EPI_ISL_13632179, EPI_ISL_13632180, EPI_ISL_13632181, EPI_ISL_13632182, EPI_ISL_13632183, EPI_ISL_13632184, EPI_ISL_13632185, EPI_ISL_13632186, EPI_ISL_13632187, EPI_ISL_13632188, EPI_ISL_13632189, EPI_ISL_13632190, EPI_ISL_13632191, EPI_ISL_13632192, EPI_ISL_13632193                                                                                                                                                                                                                                                                                                                                                                                                                                                                                                                                                                                                                                     | Sichuan Center of Disease Control and Prevention                                         | Sichuan Center of Disease Control and Prevention                                         | Li,W., Jiang,M.F., Zhong,H.R., Cao,Y.O. and Feng,Y.L.                                                                                                                            |
| see above                                                                                                                                                                                                                                                                                                                                                                                                                                                                                                                                                                                                                                                                                                                                                                                                                                                                                                                                                                                                                                                                                                                                                  | Sichuan Center of Disease Control and Prevention                                         | Sichuan Center of Disease Control and Prevention                                         | Li,W., Jiang,M.F., Zhong,H.R., Cao,Y.O. and Feng,Y.L.                                                                                                                            |
| EPI_ISL_13738963, EPI_ISL_13738964, EPI_ISL_13765791, EPI_ISL_13765792, EPI_ISL_13765793, EPI_ISL_13765794, EPI_ISL_13766664, EPI_ISL_13766665, EPI_ISL_13767732, EPI_ISL_13767733, EPI_ISL_13767734, EPI_ISL_13767735, EPI_ISL_13767736, EPI_ISL_13767737, EPI_ISL_13767738, EPI_ISL_13767739, EPI_ISL_13770576, EPI_ISL_13770577, EPI_ISL_13770578, EPI_ISL_13770579, EPI_ISL_13770580, EPI_ISL_13770581, EPI_ISL_13770582, EPI_ISL_13770583, EPI_ISL_13770584, EPI_ISL_13770585, EPI_ISL_13770586, EPI_ISL_13770587, EPI_ISL_13770588, EPI_ISL_13770589, EPI_ISL_13770590, EPI_ISL_13770591                                                                                                                                                                                                                                                                                                                                                                                                                                                                                                                                                             | King George's Medical University                                                         | King George's Medical University                                                         | Prakash,O., Khan,D.N., Verma,A.K., Ramakrishna,V. and Jain,A.                                                                                                                    |
| see above                                                                                                                                                                                                                                                                                                                                                                                                                                                                                                                                                                                                                                                                                                                                                                                                                                                                                                                                                                                                                                                                                                                                                  | King George's Medical University                                                         | King George's Medical University                                                         | Prakash,O., Khan,D.N., Verma,A.K., Ramakrishna,V. and Jain,A.                                                                                                                    |
| EPI_ISL_13859884                                                                                                                                                                                                                                                                                                                                                                                                                                                                                                                                                                                                                                                                                                                                                                                                                                                                                                                                                                                                                                                                                                                                           | Vector Control Research Centre                                                           | Vector Control Research Centre                                                           | Sankari,T., Jayasree,A., Rameela Sanya,K., Varghese,B., Kumar,M., Kumar,A. and Niranjan,R.                                                                                       |
| EPI_ISL_14081633, EPI_ISL_14081634, EPI_ISL_14081635, EPI_ISL_14081636, EPI_ISL_14081637, EPI_ISL_14081698, EPI_ISL_14081699, EPI_ISL_14081700, EPI_ISL_14081701, EPI_ISL_14081702, EPI_ISL_14083175, EPI_ISL_14083176, EPI_ISL_14083177, EPI_ISL_14083178, EPI_ISL_14083179, EPI_ISL_14083180, EPI_ISL_14083181, EPI_ISL_14083182, EPI_ISL_14083183, EPI_ISL_14083184                                                                                                                                                                                                                                                                                                                                                                                                                                                                                                                                                                                                                                                                                                                                                                                     | Oxford University Clinical Research Unit                                                 | Oxford University Clinical Research Unit                                                 | Cao,T.T., Dong,T.H., Nguyen,N.M., Huynh,D.T., Ho,C.Q., Nguyen,P.T., Nguyen,C.V., Phan,Q.T., Huynh,T.T., Luong,T.T., Nguyen,H.V., Duong,T.B., Duong,K.T., Tran,V.T. and Yacoub,S. |
| see above                                                                                                                                                                                                                                                                                                                                                                                                                                                                                                                                                                                                                                                                                                                                                                                                                                                                                                                                                                                                                                                                                                                                                  | Oxford University Clinical Research Unit                                                 | Oxford University Clinical Research Unit                                                 | Cao,T.T., Dong,T.H., Nguyen,N.M., Huynh,D.T., Ho,C.Q., Nguyen,P.T., Nguyen,C.V., Phan,Q.T., Huynh,T.T., Luong,T.T., Nguyen,H.V., Duong,T.B., Duong,K.T., Tran,V.T. and Yacoub,S. |
| EPI_ISL_14253126, EPI_ISL_14253359, EPI_ISL_14253360, EPI_ISL_14253571                                                                                                                                                                                                                                                                                                                                                                                                                                                                                                                                                                                                                                                                                                                                                                                                                                                                                                                                                                                                                                                                                     | ICMR-National Institute of Cholera and Enteric Diseases                                  | ICMR-National Institute of Cholera and Enteric Diseases                                  | Baskey,U., Verma,P. and Sadhukhan,P.C.                                                                                                                                           |
| EPI_ISL_14287342, EPI_ISL_14287343, EPI_ISL_14287344, EPI_ISL_14287345, EPI_ISL_14287346, EPI_ISL_14287620, EPI_ISL_14288925, EPI_ISL_14288926, EPI_ISL_14288927, EPI_ISL_14289595, EPI_ISL_14289596, EPI_ISL_14289597, EPI_ISL_14289598, EPI_ISL_14289599, EPI_ISL_14289600, EPI_ISL_14289601, EPI_ISL_14289602, EPI_ISL_14289603, EPI_ISL_14289604, EPI_ISL_14289605, EPI_ISL_14289606                                                                                                                                                                                                                                                                                                                                                                                                                                                                                                                                                                                                                                                                                                                                                                   | ICMR-National Institute of Cholera and Enteric Diseases                                  | ICMR-National Institute of Cholera and Enteric Diseases                                  | Baskey,U., Verma,P., Ghosh,A. and Sadhukhan,P.C.                                                                                                                                 |
| see above                                                                                                                                                                                                                                                                                                                                                                                                                                                                                                                                                                                                                                                                                                                                                                                                                                                                                                                                                                                                                                                                                                                                                  | ICMR-National Institute of Cholera and Enteric Diseases                                  | ICMR-National Institute of Cholera and Enteric Diseases                                  | Baskey,U., Verma,P., Ghosh,A. and Sadhukhan,P.C.                                                                                                                                 |
| EPI_ISL_14675766, EPI_ISL_14675767                                                                                                                                                                                                                                                                                                                                                                                                                                                                                                                                                                                                                                                                                                                                                                                                                                                                                                                                                                                                                                                                                                                         | Laboratory of Tropical Disease Control of Ministry of Education, Sun Yat-sen University, | Laboratory of Tropical Disease Control of Ministry of Education, Sun Yat-sen University, | Hu,M., Wu,T., Yang,Y., Chen,T., Hao,J., Wei,Y., Luo,T., Wu and Li,Y.P.                                                                                                           |
| EPI_ISL_14810174, EPI_ISL_14810175, EPI_ISL_14810176, EPI_ISL_14810177, EPI_ISL_14810178, EPI_ISL_14810179, EPI_ISL_14810180, EPI_ISL_14810181, EPI_ISL_14810182, EPI_ISL_14810273, EPI_ISL_14810368                                                                                                                                                                                                                                                                                                                                                                                                                                                                                                                                                                                                                                                                                                                                                                                                                                                                                                                                                       | National Institute of Cholera and Enteric Diseases                                       | National Institute of Cholera and Enteric Diseases                                       | Sadhukhan,P.C. and Verma,P.                                                                                                                                                      |
| see above                                                                                                                                                                                                                                                                                                                                                                                                                                                                                                                                                                                                                                                                                                                                                                                                                                                                                                                                                                                                                                                                                                                                                  | National Institute of Cholera and Enteric Diseases                                       | National Institute of Cholera and Enteric Diseases                                       | Sadhukhan,P.C. and Verma,P.                                                                                                                                                      |

| Diseases                                                                                                                                                                                                                                                                                                                                                                                                                                                                                                                                                                                                                                                                                                                                                                                                                                                                                                                                                                                                                                                                                                                                                                                                                                                                                                                                                                                                                                                                                                                                                                                                                                                                                                                                                                                                                                                                                                                                                                                                                                                                                                                                                                                                                                                                                                                                                                                                                                                                                                                                                                                             |                                                               |                                                               |                                                    |                                                                                                                                                                                  |  |
|------------------------------------------------------------------------------------------------------------------------------------------------------------------------------------------------------------------------------------------------------------------------------------------------------------------------------------------------------------------------------------------------------------------------------------------------------------------------------------------------------------------------------------------------------------------------------------------------------------------------------------------------------------------------------------------------------------------------------------------------------------------------------------------------------------------------------------------------------------------------------------------------------------------------------------------------------------------------------------------------------------------------------------------------------------------------------------------------------------------------------------------------------------------------------------------------------------------------------------------------------------------------------------------------------------------------------------------------------------------------------------------------------------------------------------------------------------------------------------------------------------------------------------------------------------------------------------------------------------------------------------------------------------------------------------------------------------------------------------------------------------------------------------------------------------------------------------------------------------------------------------------------------------------------------------------------------------------------------------------------------------------------------------------------------------------------------------------------------------------------------------------------------------------------------------------------------------------------------------------------------------------------------------------------------------------------------------------------------------------------------------------------------------------------------------------------------------------------------------------------------------------------------------------------------------------------------------------------------|---------------------------------------------------------------|---------------------------------------------------------------|----------------------------------------------------|----------------------------------------------------------------------------------------------------------------------------------------------------------------------------------|--|
| EPI_ISL_14818767                                                                                                                                                                                                                                                                                                                                                                                                                                                                                                                                                                                                                                                                                                                                                                                                                                                                                                                                                                                                                                                                                                                                                                                                                                                                                                                                                                                                                                                                                                                                                                                                                                                                                                                                                                                                                                                                                                                                                                                                                                                                                                                                                                                                                                                                                                                                                                                                                                                                                                                                                                                     | Bernhard Nocht Institute for Tropical Medicine (BNITM)        | Bernhard Nocht Institute for Tropical Medicine (BNITM)        |                                                    | Tchibozo,C., Houknonwanrin,G., Yadoulleton,A., Bialonski,A., Agboli,E., Luhken,R., Schmidt-Chanasit,J. and Jost,H.                                                               |  |
| EPI_ISL_14853337                                                                                                                                                                                                                                                                                                                                                                                                                                                                                                                                                                                                                                                                                                                                                                                                                                                                                                                                                                                                                                                                                                                                                                                                                                                                                                                                                                                                                                                                                                                                                                                                                                                                                                                                                                                                                                                                                                                                                                                                                                                                                                                                                                                                                                                                                                                                                                                                                                                                                                                                                                                     | Guangzhou Center for Disease Control and Prevention           | Guangzhou Center for Disease Control and Prevention           |                                                    | Su,W., Cao,Y. and Lu,W.                                                                                                                                                          |  |
| EPI_ISL_14907012, EPI_ISL_14907478, EPI_ISL_14907479, EPI_ISL_14907480, EPI_ISL_14907481, EPI_ISL_14907482, EPI_ISL_14907483, EPI_ISL_14907615, EPI_ISL_14907616, EPI_ISL_14907617, EPI_ISL_14907618, EPI_ISL_14907619, EPI_ISL_14907620, EPI_ISL_14907621, EPI_ISL_14908177, EPI_ISL_14908230, EPI_ISL_14908231, EPI_ISL_14908232                                                                                                                                                                                                                                                                                                                                                                                                                                                                                                                                                                                                                                                                                                                                                                                                                                                                                                                                                                                                                                                                                                                                                                                                                                                                                                                                                                                                                                                                                                                                                                                                                                                                                                                                                                                                                                                                                                                                                                                                                                                                                                                                                                                                                                                                   | see above                                                     | The National Environment Agency                               | The National Environment Agency                    | Hapuarachchi,H.C., Setoh,Y.X., Wong,J.C.C. and Ng,L.C.                                                                                                                           |  |
| EPI_ISL_14908638, EPI_ISL_14908639, EPI_ISL_14908640, EPI_ISL_14908641, EPI_ISL_14908642, EPI_ISL_14908643, EPI_ISL_14908644, EPI_ISL_14908645, EPI_ISL_14908646, EPI_ISL_14908647, EPI_ISL_14908648, EPI_ISL_14908649, EPI_ISL_14908650, EPI_ISL_14908651, EPI_ISL_14908652, EPI_ISL_14908653, EPI_ISL_14908654, EPI_ISL_14908655, EPI_ISL_14908656, EPI_ISL_14908657, EPI_ISL_14908658, EPI_ISL_14908659, EPI_ISL_14908660, EPI_ISL_14908661, EPI_ISL_14908662, EPI_ISL_14908663, EPI_ISL_14908664, EPI_ISL_14908665, EPI_ISL_14908666, EPI_ISL_14908667, EPI_ISL_14908668, EPI_ISL_14908669, EPI_ISL_14908670, EPI_ISL_14908671, EPI_ISL_14908672, EPI_ISL_14908673, EPI_ISL_14908674, EPI_ISL_14908675, EPI_ISL_14908676, EPI_ISL_14908677, EPI_ISL_14908678, EPI_ISL_14908679, EPI_ISL_14908680, EPI_ISL_14908681, EPI_ISL_14908682, EPI_ISL_14908683, EPI_ISL_14908684, EPI_ISL_14908685, EPI_ISL_14908686, EPI_ISL_14908687, EPI_ISL_14908688, EPI_ISL_14908689, EPI_ISL_14908690, EPI_ISL_14908691, EPI_ISL_14908692, EPI_ISL_14908693, EPI_ISL_14908694, EPI_ISL_14908695, EPI_ISL_14908696, EPI_ISL_14908697, EPI_ISL_14908698, EPI_ISL_14908699, EPI_ISL_14908700, EPI_ISL_14908701, EPI_ISL_14908702, EPI_ISL_14908703, EPI_ISL_14908704, EPI_ISL_14908705, EPI_ISL_14908706, EPI_ISL_14908707, EPI_ISL_14908708, EPI_ISL_14908709, EPI_ISL_14908710, EPI_ISL_14908711, EPI_ISL_14908712, EPI_ISL_14908713, EPI_ISL_14908714, EPI_ISL_14908715, EPI_ISL_14908716, EPI_ISL_14908717, EPI_ISL_14908718, EPI_ISL_14908719, EPI_ISL_14908720, EPI_ISL_14908721, EPI_ISL_14908722, EPI_ISL_14908723, EPI_ISL_14908724, EPI_ISL_14908725, EPI_ISL_14908726, EPI_ISL_14908727, EPI_ISL_14908728, EPI_ISL_14908729, EPI_ISL_14908730, EPI_ISL_14908731, EPI_ISL_14908732, EPI_ISL_14908733, EPI_ISL_14908734, EPI_ISL_14908735, EPI_ISL_14908736, EPI_ISL_14908737, EPI_ISL_14908738, EPI_ISL_14908739, EPI_ISL_14908740, EPI_ISL_14908741, EPI_ISL_14908742, EPI_ISL_14908743, EPI_ISL_14908744, EPI_ISL_14908745, EPI_ISL_14908746, EPI_ISL_14908747, EPI_ISL_14908748, EPI_ISL_14908749, EPI_ISL_14908750, EPI_ISL_14908751, EPI_ISL_14908752, EPI_ISL_14908753, EPI_ISL_14908754, EPI_ISL_14908755, EPI_ISL_14908756, EPI_ISL_14908757, EPI_ISL_14908758, EPI_ISL_14908759, EPI_ISL_14908760, EPI_ISL_14908761, EPI_ISL_14908762, EPI_ISL_14908763                                                                                                                                                                                                                                           | see above                                                     | Instituto Adolfo Lutz - Vector Transmission Diseases          | Instituto Adolfo Lutz - Strategic Laboratory       | Claudio Tavares Sacchi, Karoline Rodrigues Campos, Marlon Benedito Nascimento Santos, Alex Domingos Reis, Juliana da Silva Nogueira, Adriana Yurika Maeda                        |  |
| EPI_ISL_14908764                                                                                                                                                                                                                                                                                                                                                                                                                                                                                                                                                                                                                                                                                                                                                                                                                                                                                                                                                                                                                                                                                                                                                                                                                                                                                                                                                                                                                                                                                                                                                                                                                                                                                                                                                                                                                                                                                                                                                                                                                                                                                                                                                                                                                                                                                                                                                                                                                                                                                                                                                                                     | LACEN do Estado do Amazonas                                   | Instituto Adolfo Lutz - Strategic Laboratory                  |                                                    | Claudio Tavares Sacchi, Karoline Rodrigues Campos, Marlon Benedito Nascimento Santos, Alex Domingos Reis, Juliana da Silva Nogueira, Adriana Yurika Maeda                        |  |
| EPI_ISL_14908765, EPI_ISL_14908766, EPI_ISL_14908767, EPI_ISL_14908768, EPI_ISL_14908769, EPI_ISL_14908770, EPI_ISL_14908771, EPI_ISL_14908772, EPI_ISL_14908773, EPI_ISL_14908774, EPI_ISL_14908775, EPI_ISL_14908776, EPI_ISL_14908777, EPI_ISL_14908778, EPI_ISL_14908779, EPI_ISL_14908780, EPI_ISL_14908781, EPI_ISL_14908782, EPI_ISL_14908783, EPI_ISL_14908784, EPI_ISL_14908785, EPI_ISL_14908786, EPI_ISL_14908787, EPI_ISL_14908788, EPI_ISL_14908789, EPI_ISL_14908790, EPI_ISL_14908791, EPI_ISL_14908792, EPI_ISL_14908793, EPI_ISL_14908794, EPI_ISL_14908795, EPI_ISL_14908796, EPI_ISL_14908797, EPI_ISL_14908798, EPI_ISL_14908799, EPI_ISL_14908800, EPI_ISL_14908801, EPI_ISL_14908802, EPI_ISL_14908803, EPI_ISL_14908804, EPI_ISL_14908805, EPI_ISL_14908806, EPI_ISL_14908807, EPI_ISL_14908808, EPI_ISL_14908809, EPI_ISL_14908810, EPI_ISL_14908811, EPI_ISL_14908812, EPI_ISL_14908813, EPI_ISL_14908814, EPI_ISL_14908815, EPI_ISL_14908816, EPI_ISL_14908817, EPI_ISL_14908818, EPI_ISL_14908819, EPI_ISL_14908820, EPI_ISL_14908821, EPI_ISL_14908822, EPI_ISL_14908823, EPI_ISL_14908824, EPI_ISL_14908825, EPI_ISL_14908826, EPI_ISL_14908827, EPI_ISL_14908828, EPI_ISL_14908829, EPI_ISL_14908830, EPI_ISL_14908831, EPI_ISL_14908832, EPI_ISL_14908833, EPI_ISL_14908834, EPI_ISL_14908835, EPI_ISL_14908836, EPI_ISL_14908837, EPI_ISL_14908838, EPI_ISL_14908839, EPI_ISL_14908840, EPI_ISL_14908841, EPI_ISL_14908842, EPI_ISL_14908843, EPI_ISL_14908844, EPI_ISL_14908845, EPI_ISL_14908846, EPI_ISL_14908847, EPI_ISL_14908848, EPI_ISL_14908849, EPI_ISL_14908850, EPI_ISL_14908851, EPI_ISL_14908852, EPI_ISL_14908853, EPI_ISL_14908854, EPI_ISL_14908855, EPI_ISL_14908856, EPI_ISL_14908857, EPI_ISL_14908858, EPI_ISL_14908859, EPI_ISL_14908860, EPI_ISL_14908861, EPI_ISL_14908862, EPI_ISL_14908863, EPI_ISL_14908864, EPI_ISL_14908865, EPI_ISL_14908866, EPI_ISL_14908867, EPI_ISL_14908868, EPI_ISL_14908869, EPI_ISL_14908870, EPI_ISL_14908871, EPI_ISL_14908872, EPI_ISL_14908873, EPI_ISL_14908874, EPI_ISL_14908875, EPI_ISL_14908876, EPI_ISL_14908877, EPI_ISL_14908878, EPI_ISL_14908879, EPI_ISL_14908880, EPI_ISL_14908881, EPI_ISL_14908882, EPI_ISL_14908883, EPI_ISL_14908884, EPI_ISL_14908885, EPI_ISL_14908886, EPI_ISL_14908887, EPI_ISL_14908888, EPI_ISL_14908889, EPI_ISL_14908890, EPI_ISL_14908891, EPI_ISL_14908892, EPI_ISL_14908893, EPI_ISL_14908894, EPI_ISL_14908895, EPI_ISL_14908896, EPI_ISL_14908897, EPI_ISL_14908898, EPI_ISL_14908899, EPI_ISL_14908900, EPI_ISL_14908901, EPI_ISL_14908902, EPI_ISL_14908903 | see above                                                     | Instituto Adolfo Lutz - Vector Transmission Diseases          | Instituto Adolfo Lutz - Strategic Laboratory       | Claudio Tavares Sacchi, Karoline Rodrigues Campos, Marlon Benedito Nascimento Santos, Alex Domingos Reis, Juliana da Silva Nogueira, Adriana Yurika Maeda                        |  |
| EPI_ISL_14908904                                                                                                                                                                                                                                                                                                                                                                                                                                                                                                                                                                                                                                                                                                                                                                                                                                                                                                                                                                                                                                                                                                                                                                                                                                                                                                                                                                                                                                                                                                                                                                                                                                                                                                                                                                                                                                                                                                                                                                                                                                                                                                                                                                                                                                                                                                                                                                                                                                                                                                                                                                                     | Dengue Branch, Centers for Disease Control and Prevention     | Dengue Branch, Centers for Disease Control and Prevention     |                                                    | Santiago,G.A., Gonzalez-Morales,G., Charriez,K., Flores,B., Stanek,D., Morrison,A. and Munoz-Jordan,J.L.                                                                         |  |
| EPI_ISL_14916174, EPI_ISL_14916175, EPI_ISL_14916176, EPI_ISL_14916177, EPI_ISL_14916178, EPI_ISL_14916179, EPI_ISL_14916180, EPI_ISL_14916181, EPI_ISL_14916182, EPI_ISL_14916183, EPI_ISL_14916184, EPI_ISL_14916185                                                                                                                                                                                                                                                                                                                                                                                                                                                                                                                                                                                                                                                                                                                                                                                                                                                                                                                                                                                                                                                                                                                                                                                                                                                                                                                                                                                                                                                                                                                                                                                                                                                                                                                                                                                                                                                                                                                                                                                                                                                                                                                                                                                                                                                                                                                                                                               | see above                                                     | National Institute of Cholera and Enteric Diseases            | National Institute of Cholera and Enteric Diseases | Sadhukhan,P.C. and Verma,P.                                                                                                                                                      |  |
| EPI_ISL_14931901, EPI_ISL_14932897                                                                                                                                                                                                                                                                                                                                                                                                                                                                                                                                                                                                                                                                                                                                                                                                                                                                                                                                                                                                                                                                                                                                                                                                                                                                                                                                                                                                                                                                                                                                                                                                                                                                                                                                                                                                                                                                                                                                                                                                                                                                                                                                                                                                                                                                                                                                                                                                                                                                                                                                                                   | Punjab University                                             | Punjab University                                             |                                                    | Munir,R., Rafique,S., Ali,A., Idrees,M. and Amin,I.                                                                                                                              |  |
| EPI_ISL_14946121                                                                                                                                                                                                                                                                                                                                                                                                                                                                                                                                                                                                                                                                                                                                                                                                                                                                                                                                                                                                                                                                                                                                                                                                                                                                                                                                                                                                                                                                                                                                                                                                                                                                                                                                                                                                                                                                                                                                                                                                                                                                                                                                                                                                                                                                                                                                                                                                                                                                                                                                                                                     | Instituto Nacional de Salud                                   | Instituto Nacional de Salud                                   |                                                    | Rosales-Munar,A., Rivera,J., Rengifo,A., Diaz-Herrera,T.H., Parra,E., Laiton-Donato,K., Alvarez-Diaz,D.A., Usme-Ciro,J.A. and Caldas,M.L.                                        |  |
| EPI_ISL_15017943, EPI_ISL_15017944, EPI_ISL_15018597, EPI_ISL_15018598, EPI_ISL_15019070, EPI_ISL_15019071, EPI_ISL_15019072                                                                                                                                                                                                                                                                                                                                                                                                                                                                                                                                                                                                                                                                                                                                                                                                                                                                                                                                                                                                                                                                                                                                                                                                                                                                                                                                                                                                                                                                                                                                                                                                                                                                                                                                                                                                                                                                                                                                                                                                                                                                                                                                                                                                                                                                                                                                                                                                                                                                         | Oxford University Clinical Research Unit                      | Oxford University Clinical Research Unit                      |                                                    | Cao,T.T., Dong,T.H., Nguyen,N.M., Huynh,D.T., Ho,C.Q., Nguyen,P.T., Nguyen,C.V., Phan,Q.T., Huynh,T.T., Luong,T.T., Nguyen,H.V., Duong,T.B., Duong,K.T., Tran,V.T. and Yacoub,S. |  |
| EPI_ISL_15052681, EPI_ISL_15052682, EPI_ISL_15052683, EPI_ISL_15052684, EPI_ISL_15052685, EPI_ISL_15052686                                                                                                                                                                                                                                                                                                                                                                                                                                                                                                                                                                                                                                                                                                                                                                                                                                                                                                                                                                                                                                                                                                                                                                                                                                                                                                                                                                                                                                                                                                                                                                                                                                                                                                                                                                                                                                                                                                                                                                                                                                                                                                                                                                                                                                                                                                                                                                                                                                                                                           | Instituto Nacional de Salud                                   | Instituto Nacional de Salud                                   |                                                    | Rosales-Munar,A., Rivera,J., Rengifo,A., Diaz-Herrera,T.H., Parra,E., Laiton-Donato,K., Alvarez-Diaz,D.A., Usme-Ciro,J.A. and Caldas,M.L.                                        |  |
| EPI_ISL_15052687                                                                                                                                                                                                                                                                                                                                                                                                                                                                                                                                                                                                                                                                                                                                                                                                                                                                                                                                                                                                                                                                                                                                                                                                                                                                                                                                                                                                                                                                                                                                                                                                                                                                                                                                                                                                                                                                                                                                                                                                                                                                                                                                                                                                                                                                                                                                                                                                                                                                                                                                                                                     | Instituto Nacional de Salud                                   | Instituto Nacional de Salud                                   |                                                    | Rosales-Munar,A., Rivera,J., Rengifo,A., Diaz-Herrera,T., Parra,E., Laiton-Donato,K., Alvarez-Diaz,D., Usme-Ciro,J. and Caldas,M.                                                |  |
| EPI_ISL_15067517, EPI_ISL_15067890, EPI_ISL_15068082, EPI_ISL_15068185, EPI_ISL_15068186, EPI_ISL_15068187, EPI_ISL_15068188, EPI_ISL_15068201, EPI_ISL_15072557, EPI_ISL_15072558, EPI_ISL_15072559, EPI_ISL_15072669, EPI_ISL_15072670, EPI_ISL_15072713                                                                                                                                                                                                                                                                                                                                                                                                                                                                                                                                                                                                                                                                                                                                                                                                                                                                                                                                                                                                                                                                                                                                                                                                                                                                                                                                                                                                                                                                                                                                                                                                                                                                                                                                                                                                                                                                                                                                                                                                                                                                                                                                                                                                                                                                                                                                           | see above                                                     | Center for Disease Control and Prevention                     | Center for Disease Control and Prevention          | Guo,L., Xu,M., Chen,Q., Yang,B. and Wang,J.                                                                                                                                      |  |
| EPI_ISL_15078295, EPI_ISL_15078717, EPI_ISL_15078718, EPI_ISL_15078719, EPI_ISL_15078720, EPI_ISL_15078958, EPI_ISL_15079570, EPI_ISL_15079848, EPI_ISL_15079849, EPI_ISL_15079850, EPI_ISL_15079851, EPI_ISL_15082327, EPI_ISL_15083530, EPI_ISL_15083531, EPI_ISL_15083536, EPI_ISL_15083636, EPI_ISL_15083681, EPI_ISL_15083926, EPI_ISL_15083929, EPI_ISL_15083935, EPI_ISL_15084659, EPI_ISL_15085326, EPI_ISL_15085528, EPI_ISL_15085529, EPI_ISL_15088380, EPI_ISL_15088390, EPI_ISL_15088514, EPI_ISL_15088515, EPI_ISL_15088516, EPI_ISL_15088517, EPI_ISL_15088518, EPI_ISL_15088519, EPI_ISL_15088520, EPI_ISL_15088521, EPI_ISL_15088522, EPI_ISL_15088523, EPI_ISL_15088524, EPI_ISL_15088525, EPI_ISL_15088526                                                                                                                                                                                                                                                                                                                                                                                                                                                                                                                                                                                                                                                                                                                                                                                                                                                                                                                                                                                                                                                                                                                                                                                                                                                                                                                                                                                                                                                                                                                                                                                                                                                                                                                                                                                                                                                                         | see above                                                     | Oxford University Clinical Research Unit                      | Oxford University Clinical Research Unit           | Duong,K.T., Tran,V.T., Dong,T.H., Farrar,J., Tran,N.V., Tran,T.T., Gutzman,M.G., Wills,B.A. and Simmons,C.P.                                                                     |  |
| EPI_ISL_15292346, EPI_ISL_15292347, EPI_ISL_15292424, EPI_ISL_15292425, EPI_ISL_15292426                                                                                                                                                                                                                                                                                                                                                                                                                                                                                                                                                                                                                                                                                                                                                                                                                                                                                                                                                                                                                                                                                                                                                                                                                                                                                                                                                                                                                                                                                                                                                                                                                                                                                                                                                                                                                                                                                                                                                                                                                                                                                                                                                                                                                                                                                                                                                                                                                                                                                                             | see above                                                     | Institute for Medical Research                                | Infectious Disease Research Centre                 | Suppiah,J., Ramly,M.N. and Robert,F.                                                                                                                                             |  |
| EPI_ISL_15292427                                                                                                                                                                                                                                                                                                                                                                                                                                                                                                                                                                                                                                                                                                                                                                                                                                                                                                                                                                                                                                                                                                                                                                                                                                                                                                                                                                                                                                                                                                                                                                                                                                                                                                                                                                                                                                                                                                                                                                                                                                                                                                                                                                                                                                                                                                                                                                                                                                                                                                                                                                                     | Institute for Medical Research, National Institutes of Health | Institute for Medical Research, National Institutes of Health |                                                    | Suppiah,J., Ramly,M.N. and Robert,F.                                                                                                                                             |  |
| EPI_ISL_15292428, EPI_ISL_15292429                                                                                                                                                                                                                                                                                                                                                                                                                                                                                                                                                                                                                                                                                                                                                                                                                                                                                                                                                                                                                                                                                                                                                                                                                                                                                                                                                                                                                                                                                                                                                                                                                                                                                                                                                                                                                                                                                                                                                                                                                                                                                                                                                                                                                                                                                                                                                                                                                                                                                                                                                                   | Institute for Medical Research                                | Infectious Disease Research Centre                            |                                                    | Suppiah,J., Ramly,M.N. and Robert,F.                                                                                                                                             |  |
| EPI_ISL_15292430, EPI_ISL_15292431, EPI_ISL_15292432, EPI_ISL_15292433                                                                                                                                                                                                                                                                                                                                                                                                                                                                                                                                                                                                                                                                                                                                                                                                                                                                                                                                                                                                                                                                                                                                                                                                                                                                                                                                                                                                                                                                                                                                                                                                                                                                                                                                                                                                                                                                                                                                                                                                                                                                                                                                                                                                                                                                                                                                                                                                                                                                                                                               | Institute for Medical Research, National Institutes of Health | Institute for Medical Research, National Institutes of Health |                                                    | Suppiah,J., Ramly,M.N. and Robert,F.                                                                                                                                             |  |
| EPI_ISL_15292434                                                                                                                                                                                                                                                                                                                                                                                                                                                                                                                                                                                                                                                                                                                                                                                                                                                                                                                                                                                                                                                                                                                                                                                                                                                                                                                                                                                                                                                                                                                                                                                                                                                                                                                                                                                                                                                                                                                                                                                                                                                                                                                                                                                                                                                                                                                                                                                                                                                                                                                                                                                     | Institute for Medical Research                                | Infectious Disease Research Centre                            |                                                    | Suppiah,J., Ramly,M.N. and Robert,F.                                                                                                                                             |  |
| EPI_ISL_15314344                                                                                                                                                                                                                                                                                                                                                                                                                                                                                                                                                                                                                                                                                                                                                                                                                                                                                                                                                                                                                                                                                                                                                                                                                                                                                                                                                                                                                                                                                                                                                                                                                                                                                                                                                                                                                                                                                                                                                                                                                                                                                                                                                                                                                                                                                                                                                                                                                                                                                                                                                                                     | Institute for Medical Research, National Institutes of Health | Institute for Medical Research, National Institutes of Health |                                                    | Suppiah,J., Ramly,M.N. and Robert,F.                                                                                                                                             |  |
| EPI_ISL_15381632, EPI_ISL_15381633, EPI_ISL_15381634                                                                                                                                                                                                                                                                                                                                                                                                                                                                                                                                                                                                                                                                                                                                                                                                                                                                                                                                                                                                                                                                                                                                                                                                                                                                                                                                                                                                                                                                                                                                                                                                                                                                                                                                                                                                                                                                                                                                                                                                                                                                                                                                                                                                                                                                                                                                                                                                                                                                                                                                                 | Bangalore University                                          | Bangalore University                                          |                                                    | Doddamane,M. and Ramachandra,S.                                                                                                                                                  |  |
| EPI_ISL_15416610, EPI_ISL_15416611, EPI_ISL_15416612, EPI_ISL_15416613, EPI_ISL_15416928, EPI_ISL_15416930, EPI_ISL_15416931, EPI_ISL_15416983, EPI_ISL_15416984, EPI_ISL_15416985, EPI_ISL_15417893, EPI_ISL_15417894, EPI_ISL_15417895, EPI_ISL_15417896, EPI_ISL_15417897, EPI_ISL_15417898                                                                                                                                                                                                                                                                                                                                                                                                                                                                                                                                                                                                                                                                                                                                                                                                                                                                                                                                                                                                                                                                                                                                                                                                                                                                                                                                                                                                                                                                                                                                                                                                                                                                                                                                                                                                                                                                                                                                                                                                                                                                                                                                                                                                                                                                                                       | see above                                                     | Hangzhou Center for Disease Control and Prevention            | Hangzhou Center for Disease Control and Prevention | Yu,H.                                                                                                                                                                            |  |
| EPI_ISL_15417899, EPI_ISL_15417900                                                                                                                                                                                                                                                                                                                                                                                                                                                                                                                                                                                                                                                                                                                                                                                                                                                                                                                                                                                                                                                                                                                                                                                                                                                                                                                                                                                                                                                                                                                                                                                                                                                                                                                                                                                                                                                                                                                                                                                                                                                                                                                                                                                                                                                                                                                                                                                                                                                                                                                                                                   | Shenzhen Center for Disease Control and Prevention            | Shenzhen Center for Disease Control and Prevention            |                                                    | Yang,F.                                                                                                                                                                          |  |
| EPI_ISL_15417901, EPI_ISL_15417902, EPI_ISL_15417903, EPI_ISL_15417904, EPI_ISL_15417905, EPI_ISL_15417906, EPI_ISL_15417907, EPI_ISL_15417908, EPI_ISL_15417909, EPI_ISL_15417910, EPI_ISL_15417911, EPI_ISL_15417912, EPI_ISL_15417913, EPI_ISL_15417914, EPI_ISL_15417915, EPI_ISL_15417916, EPI_ISL_15417917, EPI_ISL_15417918, EPI_ISL_15417919, EPI_ISL_15417920, EPI_ISL_15417921, EPI_ISL_15417922, EPI_ISL_15417923, EPI_ISL_15417924, EPI_ISL_15417925, EPI_ISL_15417926, EPI_ISL_15417927, EPI_ISL_15417928, EPI_ISL_15417929, EPI_ISL_15417930, EPI_ISL_15417931, EPI_ISL_15417932, EPI_ISL_15417933, EPI_ISL_15417934, EPI_ISL_15417935, EPI_ISL_15417936, EPI_ISL_15417937, EPI_ISL_15417938, EPI_ISL_15417939, EPI_ISL_15417940, EPI_ISL_15417941, EPI_ISL_15417942, EPI_ISL_15417943, EPI_ISL_15417944, EPI_ISL_15417945, EPI_ISL_15417946, EPI_ISL_15417947, EPI_ISL_15419452, EPI_ISL_15420000, EPI_ISL_15420001, EPI_ISL_15420002, EPI_ISL_15420003, EPI_ISL_15420005, EPI_ISL_15420007, EPI_ISL_15420008                                                                                                                                                                                                                                                                                                                                                                                                                                                                                                                                                                                                                                                                                                                                                                                                                                                                                                                                                                                                                                                                                                                                                                                                                                                                                                                                                                                                                                                                                                                                                                         | see above                                                     | Hangzhou Center for Disease Control and Prevention            | Hangzhou Center for Disease Control and Prevention | Yu,H.                                                                                                                                                                            |  |
| EPI_ISL_15572066                                                                                                                                                                                                                                                                                                                                                                                                                                                                                                                                                                                                                                                                                                                                                                                                                                                                                                                                                                                                                                                                                                                                                                                                                                                                                                                                                                                                                                                                                                                                                                                                                                                                                                                                                                                                                                                                                                                                                                                                                                                                                                                                                                                                                                                                                                                                                                                                                                                                                                                                                                                     | Jashore University of Science and Technology                  | Jashore University of Science and Technology                  |                                                    | Rahman,M., Sarker,M.M.H. and Khan,S.                                                                                                                                             |  |
| EPI_ISL_15576656, EPI_ISL_15576657                                                                                                                                                                                                                                                                                                                                                                                                                                                                                                                                                                                                                                                                                                                                                                                                                                                                                                                                                                                                                                                                                                                                                                                                                                                                                                                                                                                                                                                                                                                                                                                                                                                                                                                                                                                                                                                                                                                                                                                                                                                                                                                                                                                                                                                                                                                                                                                                                                                                                                                                                                   | Jashore University of Science and Technology                  | Jashore University of Science and Technology                  |                                                    | Rahman,M.S., Sarker,M.M.H. and Khan,S.                                                                                                                                           |  |
| EPI_ISL_15609136, EPI_ISL_15609137, EPI_ISL_15609138, EPI_ISL_15609139                                                                                                                                                                                                                                                                                                                                                                                                                                                                                                                                                                                                                                                                                                                                                                                                                                                                                                                                                                                                                                                                                                                                                                                                                                                                                                                                                                                                                                                                                                                                                                                                                                                                                                                                                                                                                                                                                                                                                                                                                                                                                                                                                                                                                                                                                                                                                                                                                                                                                                                               | National Institute of Cholera and Enteric Diseases            | National Institute of Cholera and Enteric Diseases            |                                                    | Verma,P. and Sadhukhan,D.P.                                                                                                                                                      |  |
| EPI_ISL_15609140, EPI_ISL_15609141, EPI_ISL_15609145, EPI_ISL_15609146, EPI_ISL_15609147                                                                                                                                                                                                                                                                                                                                                                                                                                                                                                                                                                                                                                                                                                                                                                                                                                                                                                                                                                                                                                                                                                                                                                                                                                                                                                                                                                                                                                                                                                                                                                                                                                                                                                                                                                                                                                                                                                                                                                                                                                                                                                                                                                                                                                                                                                                                                                                                                                                                                                             | ICMR- National Institute of Cholera and Enteric Diseases      | ICMR- National Institute of Cholera and Enteric Diseases      |                                                    | Verma,P. and Sadhukhan,D.P.                                                                                                                                                      |  |
| EPI_ISL_15609148, EPI_ISL_15609149, EPI_ISL_15609150                                                                                                                                                                                                                                                                                                                                                                                                                                                                                                                                                                                                                                                                                                                                                                                                                                                                                                                                                                                                                                                                                                                                                                                                                                                                                                                                                                                                                                                                                                                                                                                                                                                                                                                                                                                                                                                                                                                                                                                                                                                                                                                                                                                                                                                                                                                                                                                                                                                                                                                                                 | National Institute of Cholera and Enteric Diseases            | National Institute of Cholera and Enteric Diseases            |                                                    | Verma,P. and Sadhukhan,D.P.                                                                                                                                                      |  |
| EPI_ISL_15693125, EPI_ISL_15693223, EPI_ISL_15693224, EPI_ISL_15693225, EPI_ISL_15693304, EPI_ISL_15693396, EPI_ISL_15693935, EPI_ISL_15693936, EPI_ISL_15693937, EPI_ISL_15693938, EPI_ISL_15694080, EPI_ISL_15694081, EPI_ISL_15694082, EPI_ISL_15694083, EPI_ISL_15694084, EPI_ISL_15694085, EPI_ISL_15694086, EPI_ISL_15694087, EPI_ISL_15694088, EPI_ISL_15694089, EPI_ISL_15694091, EPI_ISL_15694092, EPI_ISL_15694093, EPI_ISL_15694094, EPI_ISL_15694095, EPI_ISL_15694096, EPI_ISL_15694097, EPI_ISL_15694098, EPI_ISL_15694099, EPI_ISL_15694100, EPI_ISL_15694101, EPI_ISL_15694102, EPI_ISL_15694103, EPI_ISL_15694104, EPI_ISL_15694106, EPI_ISL_15694107, EPI_ISL_15694527, EPI_ISL_15694528                                                                                                                                                                                                                                                                                                                                                                                                                                                                                                                                                                                                                                                                                                                                                                                                                                                                                                                                                                                                                                                                                                                                                                                                                                                                                                                                                                                                                                                                                                                                                                                                                                                                                                                                                                                                                                                                                           | see above                                                     | Oxford University Clinical Research Unit                      | Oxford University Clinical Research Unit           | Duong,K.T.H., Tran,V.T., Dong,T.H.T., Tran,N.V., Tran,T., Wills,B.A. and Simmons,C.P.                                                                                            |  |
| EPI_ISL_15732740, EPI_ISL_15733266, EPI_ISL_15733891, EPI_ISL_15737306, EPI_ISL_15738309, EPI_ISL_15739460, EPI_ISL_15739461, EPI_ISL_15739462                                                                                                                                                                                                                                                                                                                                                                                                                                                                                                                                                                                                                                                                                                                                                                                                                                                                                                                                                                                                                                                                                                                                                                                                                                                                                                                                                                                                                                                                                                                                                                                                                                                                                                                                                                                                                                                                                                                                                                                                                                                                                                                                                                                                                                                                                                                                                                                                                                                       | see above                                                     | National Institute of Health                                  | National Institute of Health                       | Umair,M., Rehman,Z., Haider,S.A., Salman,M. and Ikram,A.                                                                                                                         |  |
| EPI_ISL_15739463, EPI_ISL_15739464, EPI_ISL_15739782, EPI_ISL_15739783, EPI_ISL_15739784, EPI_ISL_15739785, EPI_ISL_15739786, EPI_ISL_15739787, EPI_ISL_15739788, EPI_ISL_15739789, EPI_ISL_15739790, EPI_ISL_15739791, EPI_ISL_15739792                                                                                                                                                                                                                                                                                                                                                                                                                                                                                                                                                                                                                                                                                                                                                                                                                                                                                                                                                                                                                                                                                                                                                                                                                                                                                                                                                                                                                                                                                                                                                                                                                                                                                                                                                                                                                                                                                                                                                                                                                                                                                                                                                                                                                                                                                                                                                             | see above                                                     | Department of Virology                                        | Department of Virology                             | Sharma,V., Satapathy,P., Kang,M., Sarkar,S., Dhingra,S., Bora,I., Kaur,K., Goel,K., Aggarwal,A., Arora,N. and Ratho,R.K.                                                         |  |
| EPI_ISL_15823980                                                                                                                                                                                                                                                                                                                                                                                                                                                                                                                                                                                                                                                                                                                                                                                                                                                                                                                                                                                                                                                                                                                                                                                                                                                                                                                                                                                                                                                                                                                                                                                                                                                                                                                                                                                                                                                                                                                                                                                                                                                                                                                                                                                                                                                                                                                                                                                                                                                                                                                                                                                     | Institute of Medical Sciences                                 | Institute of Medical Sciences                                 |                                                    | Dinkar,A., Singh,J. and Prakash,P.                                                                                                                                               |  |
| EPI_ISL_15917022, EPI_ISL_15917023, EPI_ISL_15917114, EPI_ISL_15917153, EPI_ISL_15917154, EPI_ISL_15917736, EPI_ISL_15917737, EPI_ISL_15917798, EPI_ISL_15917799, EPI_ISL_15917800, EPI_ISL_15917801                                                                                                                                                                                                                                                                                                                                                                                                                                                                                                                                                                                                                                                                                                                                                                                                                                                                                                                                                                                                                                                                                                                                                                                                                                                                                                                                                                                                                                                                                                                                                                                                                                                                                                                                                                                                                                                                                                                                                                                                                                                                                                                                                                                                                                                                                                                                                                                                 | see above                                                     | National Public Health Center                                 | National Public Health Center                      | Nagy,O. and Takacs,M.                                                                                                                                                            |  |
| EPI_ISL_15923145, EPI_ISL_15926913, EPI_ISL_15926989                                                                                                                                                                                                                                                                                                                                                                                                                                                                                                                                                                                                                                                                                                                                                                                                                                                                                                                                                                                                                                                                                                                                                                                                                                                                                                                                                                                                                                                                                                                                                                                                                                                                                                                                                                                                                                                                                                                                                                                                                                                                                                                                                                                                                                                                                                                                                                                                                                                                                                                                                 | National Institute of Health                                  | National Institute of Health                                  |                                                    | Umair,M., Rehman,Z., Haider,S.A., Salman,M. and Ikram,A.                                                                                                                         |  |
| EPI_ISL_15952840, EPI_ISL_15952841, EPI_ISL_15952842                                                                                                                                                                                                                                                                                                                                                                                                                                                                                                                                                                                                                                                                                                                                                                                                                                                                                                                                                                                                                                                                                                                                                                                                                                                                                                                                                                                                                                                                                                                                                                                                                                                                                                                                                                                                                                                                                                                                                                                                                                                                                                                                                                                                                                                                                                                                                                                                                                                                                                                                                 | Bangalore University                                          | Bangalore University                                          |                                                    | Doddamane,M. and Ramachandra,S.                                                                                                                                                  |  |
| EPI_ISL_15997588, EPI_ISL_15997589, EPI_ISL_15997590, EPI_ISL_15997591, EPI_ISL_15997592, EPI_ISL_15997593, EPI_ISL_15997594, EPI_ISL_15997595, EPI_ISL_15997596, EPI_ISL_15997597, EPI_ISL_15997598, EPI_ISL_15997599, EPI_ISL_15997600                                                                                                                                                                                                                                                                                                                                                                                                                                                                                                                                                                                                                                                                                                                                                                                                                                                                                                                                                                                                                                                                                                                                                                                                                                                                                                                                                                                                                                                                                                                                                                                                                                                                                                                                                                                                                                                                                                                                                                                                                                                                                                                                                                                                                                                                                                                                                             | see above                                                     | Fundação Oswaldo Cruz - Instituto Leônidas e                  | Fundação Oswaldo Cruz - Instituto Leônidas e Maria | Nascimento,V.A., Souza,V.C., Goncalves,L., Nascimento,F., Mejia,M., Silva,D. and Naveca,F.G.                                                                                     |  |



|                                                                                                                                                                                                                                                                                                                                                                                                                                                                                                                                                                                                                                                                                                                                                                                                                                                                                                                                                                                                                                                                                                                                                                                                                                                                                                                                                                                                                                                                                                                                                                                                                                                                                                                                                                                                                                                                                                                                                                                                                                                                                                                                                                                                                                                                                                                                                                                                                                                                                                                                                                                                                                                                                                                                                                                                                                                                                                                                                                                                                                                                                                                                                                                                                                                                                                                                                                                                                                                                                                                                                                                                                                                                                                                                                                                                                                                                                                                                                                                                                                                                                                                                                                                                                                                                                                                                                                                                                                                                                                                                                                                                                                                                                                                                                                                                                                                                                                                                                                                                                                                                                                                                                                                                                                                                                                                                                                                                                                                                                                                                                                                                                                                                                                                                                                                                                                                                                                                                                                                                                                                                                                                                                                                                      |                                                                                                                              |                                                                                                                              |                                                                                                                                                                                                           |                                                                                                                                              |
|------------------------------------------------------------------------------------------------------------------------------------------------------------------------------------------------------------------------------------------------------------------------------------------------------------------------------------------------------------------------------------------------------------------------------------------------------------------------------------------------------------------------------------------------------------------------------------------------------------------------------------------------------------------------------------------------------------------------------------------------------------------------------------------------------------------------------------------------------------------------------------------------------------------------------------------------------------------------------------------------------------------------------------------------------------------------------------------------------------------------------------------------------------------------------------------------------------------------------------------------------------------------------------------------------------------------------------------------------------------------------------------------------------------------------------------------------------------------------------------------------------------------------------------------------------------------------------------------------------------------------------------------------------------------------------------------------------------------------------------------------------------------------------------------------------------------------------------------------------------------------------------------------------------------------------------------------------------------------------------------------------------------------------------------------------------------------------------------------------------------------------------------------------------------------------------------------------------------------------------------------------------------------------------------------------------------------------------------------------------------------------------------------------------------------------------------------------------------------------------------------------------------------------------------------------------------------------------------------------------------------------------------------------------------------------------------------------------------------------------------------------------------------------------------------------------------------------------------------------------------------------------------------------------------------------------------------------------------------------------------------------------------------------------------------------------------------------------------------------------------------------------------------------------------------------------------------------------------------------------------------------------------------------------------------------------------------------------------------------------------------------------------------------------------------------------------------------------------------------------------------------------------------------------------------------------------------------------------------------------------------------------------------------------------------------------------------------------------------------------------------------------------------------------------------------------------------------------------------------------------------------------------------------------------------------------------------------------------------------------------------------------------------------------------------------------------------------------------------------------------------------------------------------------------------------------------------------------------------------------------------------------------------------------------------------------------------------------------------------------------------------------------------------------------------------------------------------------------------------------------------------------------------------------------------------------------------------------------------------------------------------------------------------------------------------------------------------------------------------------------------------------------------------------------------------------------------------------------------------------------------------------------------------------------------------------------------------------------------------------------------------------------------------------------------------------------------------------------------------------------------------------------------------------------------------------------------------------------------------------------------------------------------------------------------------------------------------------------------------------------------------------------------------------------------------------------------------------------------------------------------------------------------------------------------------------------------------------------------------------------------------------------------------------------------------------------------------------------------------------------------------------------------------------------------------------------------------------------------------------------------------------------------------------------------------------------------------------------------------------------------------------------------------------------------------------------------------------------------------------------------------------------------------------------------------------------------|------------------------------------------------------------------------------------------------------------------------------|------------------------------------------------------------------------------------------------------------------------------|-----------------------------------------------------------------------------------------------------------------------------------------------------------------------------------------------------------|----------------------------------------------------------------------------------------------------------------------------------------------|
| EPI_ISL_17450876                                                                                                                                                                                                                                                                                                                                                                                                                                                                                                                                                                                                                                                                                                                                                                                                                                                                                                                                                                                                                                                                                                                                                                                                                                                                                                                                                                                                                                                                                                                                                                                                                                                                                                                                                                                                                                                                                                                                                                                                                                                                                                                                                                                                                                                                                                                                                                                                                                                                                                                                                                                                                                                                                                                                                                                                                                                                                                                                                                                                                                                                                                                                                                                                                                                                                                                                                                                                                                                                                                                                                                                                                                                                                                                                                                                                                                                                                                                                                                                                                                                                                                                                                                                                                                                                                                                                                                                                                                                                                                                                                                                                                                                                                                                                                                                                                                                                                                                                                                                                                                                                                                                                                                                                                                                                                                                                                                                                                                                                                                                                                                                                                                                                                                                                                                                                                                                                                                                                                                                                                                                                                                                                                                                     | Infection and Immunology, Translational Health Science and Technology Institute                                              | Infection and Immunology, Translational Health Science and Technology Institute                                              | Agrawal,T., Saraswat,S., Shashi,P., Ananthraj,A., Kumar,S., Chandele,A., Lodha,R., Singh,B. and Medigeshi,G.R.                                                                                            |                                                                                                                                              |
| EPI_ISL_17450877, EPI_ISL_17450878                                                                                                                                                                                                                                                                                                                                                                                                                                                                                                                                                                                                                                                                                                                                                                                                                                                                                                                                                                                                                                                                                                                                                                                                                                                                                                                                                                                                                                                                                                                                                                                                                                                                                                                                                                                                                                                                                                                                                                                                                                                                                                                                                                                                                                                                                                                                                                                                                                                                                                                                                                                                                                                                                                                                                                                                                                                                                                                                                                                                                                                                                                                                                                                                                                                                                                                                                                                                                                                                                                                                                                                                                                                                                                                                                                                                                                                                                                                                                                                                                                                                                                                                                                                                                                                                                                                                                                                                                                                                                                                                                                                                                                                                                                                                                                                                                                                                                                                                                                                                                                                                                                                                                                                                                                                                                                                                                                                                                                                                                                                                                                                                                                                                                                                                                                                                                                                                                                                                                                                                                                                                                                                                                                   | Infection and Immunology, Translational Health Science and Technology Institute                                              | Infection and Immunology, Translational Health Science and Technology Institute                                              | Maurya,R., Agrawal,T., Saraswat,S., Ananthraj,A., Chandele,A., Kumar,S., Kanakan,A., Chattopadhyay,P., Swaminathan,A., Saifi,S., Shashi,P., Pandey,R. and Medigeshi,G.R.                                  |                                                                                                                                              |
| EPI_ISL_17450879, EPI_ISL_17450880                                                                                                                                                                                                                                                                                                                                                                                                                                                                                                                                                                                                                                                                                                                                                                                                                                                                                                                                                                                                                                                                                                                                                                                                                                                                                                                                                                                                                                                                                                                                                                                                                                                                                                                                                                                                                                                                                                                                                                                                                                                                                                                                                                                                                                                                                                                                                                                                                                                                                                                                                                                                                                                                                                                                                                                                                                                                                                                                                                                                                                                                                                                                                                                                                                                                                                                                                                                                                                                                                                                                                                                                                                                                                                                                                                                                                                                                                                                                                                                                                                                                                                                                                                                                                                                                                                                                                                                                                                                                                                                                                                                                                                                                                                                                                                                                                                                                                                                                                                                                                                                                                                                                                                                                                                                                                                                                                                                                                                                                                                                                                                                                                                                                                                                                                                                                                                                                                                                                                                                                                                                                                                                                                                   | Infection and Immunology, Translational Health Science and Technology Institute                                              | Infection and Immunology, Translational Health Science and Technology Institute                                              | Agrawal,T., Saraswat,S., Shashi,P., Ananthraj,A., Kumar,S., Chandele,A., Lodha,R., Singh,B. and Medigeshi,G.R.                                                                                            |                                                                                                                                              |
| EPI_ISL_17450881                                                                                                                                                                                                                                                                                                                                                                                                                                                                                                                                                                                                                                                                                                                                                                                                                                                                                                                                                                                                                                                                                                                                                                                                                                                                                                                                                                                                                                                                                                                                                                                                                                                                                                                                                                                                                                                                                                                                                                                                                                                                                                                                                                                                                                                                                                                                                                                                                                                                                                                                                                                                                                                                                                                                                                                                                                                                                                                                                                                                                                                                                                                                                                                                                                                                                                                                                                                                                                                                                                                                                                                                                                                                                                                                                                                                                                                                                                                                                                                                                                                                                                                                                                                                                                                                                                                                                                                                                                                                                                                                                                                                                                                                                                                                                                                                                                                                                                                                                                                                                                                                                                                                                                                                                                                                                                                                                                                                                                                                                                                                                                                                                                                                                                                                                                                                                                                                                                                                                                                                                                                                                                                                                                                     | Infection and Immunology, Translational Health Science and Technology Institute                                              | Infection and Immunology, Translational Health Science and Technology Institute                                              | Maurya,R., Agrawal,T., Saraswat,S., Ananthraj,A., Chandele,A., Kumar,S., Kanakan,A., Chattopadhyay,P., Swaminathan,A., Saifi,S., Shashi,P., Pandey,R. and Medigeshi,G.R.                                  |                                                                                                                                              |
| EPI_ISL_17450882, EPI_ISL_17450883, EPI_ISL_17450884, EPI_ISL_17450885, EPI_ISL_17450886                                                                                                                                                                                                                                                                                                                                                                                                                                                                                                                                                                                                                                                                                                                                                                                                                                                                                                                                                                                                                                                                                                                                                                                                                                                                                                                                                                                                                                                                                                                                                                                                                                                                                                                                                                                                                                                                                                                                                                                                                                                                                                                                                                                                                                                                                                                                                                                                                                                                                                                                                                                                                                                                                                                                                                                                                                                                                                                                                                                                                                                                                                                                                                                                                                                                                                                                                                                                                                                                                                                                                                                                                                                                                                                                                                                                                                                                                                                                                                                                                                                                                                                                                                                                                                                                                                                                                                                                                                                                                                                                                                                                                                                                                                                                                                                                                                                                                                                                                                                                                                                                                                                                                                                                                                                                                                                                                                                                                                                                                                                                                                                                                                                                                                                                                                                                                                                                                                                                                                                                                                                                                                             | Infection and Immunology, Translational Health Science and Technology Institute                                              | Infection and Immunology, Translational Health Science and Technology Institute                                              | Agrawal,T., Saraswat,S., Shashi,P., Ananthraj,A., Kumar,S., Chandele,A., Lodha,R., Singh,B. and Medigeshi,G.R.                                                                                            |                                                                                                                                              |
| EPI_ISL_17450887, EPI_ISL_17450888, EPI_ISL_17450889, EPI_ISL_17450890                                                                                                                                                                                                                                                                                                                                                                                                                                                                                                                                                                                                                                                                                                                                                                                                                                                                                                                                                                                                                                                                                                                                                                                                                                                                                                                                                                                                                                                                                                                                                                                                                                                                                                                                                                                                                                                                                                                                                                                                                                                                                                                                                                                                                                                                                                                                                                                                                                                                                                                                                                                                                                                                                                                                                                                                                                                                                                                                                                                                                                                                                                                                                                                                                                                                                                                                                                                                                                                                                                                                                                                                                                                                                                                                                                                                                                                                                                                                                                                                                                                                                                                                                                                                                                                                                                                                                                                                                                                                                                                                                                                                                                                                                                                                                                                                                                                                                                                                                                                                                                                                                                                                                                                                                                                                                                                                                                                                                                                                                                                                                                                                                                                                                                                                                                                                                                                                                                                                                                                                                                                                                                                               | Infection and Immunology, Translational Health Science and Technology Institute                                              | Infection and Immunology, Translational Health Science and Technology Institute                                              | Maurya,R., Agrawal,T., Saraswat,S., Ananthraj,A., Chandele,A., Kumar,S., Kanakan,A., Chattopadhyay,P., Swaminathan,A., Saifi,S., Shashi,P., Pandey,R. and Medigeshi,G.R.                                  |                                                                                                                                              |
| EPI_ISL_17450891                                                                                                                                                                                                                                                                                                                                                                                                                                                                                                                                                                                                                                                                                                                                                                                                                                                                                                                                                                                                                                                                                                                                                                                                                                                                                                                                                                                                                                                                                                                                                                                                                                                                                                                                                                                                                                                                                                                                                                                                                                                                                                                                                                                                                                                                                                                                                                                                                                                                                                                                                                                                                                                                                                                                                                                                                                                                                                                                                                                                                                                                                                                                                                                                                                                                                                                                                                                                                                                                                                                                                                                                                                                                                                                                                                                                                                                                                                                                                                                                                                                                                                                                                                                                                                                                                                                                                                                                                                                                                                                                                                                                                                                                                                                                                                                                                                                                                                                                                                                                                                                                                                                                                                                                                                                                                                                                                                                                                                                                                                                                                                                                                                                                                                                                                                                                                                                                                                                                                                                                                                                                                                                                                                                     | Infection and Immunology, Translational Health Science and Technology Institute                                              | Infection and Immunology, Translational Health Science and Technology Institute                                              | Agrawal,T., Saraswat,S., Shashi,P., Ananthraj,A., Kumar,S., Chandele,A., Lodha,R., Singh,B. and Medigeshi,G.R.                                                                                            |                                                                                                                                              |
| EPI_ISL_17450892                                                                                                                                                                                                                                                                                                                                                                                                                                                                                                                                                                                                                                                                                                                                                                                                                                                                                                                                                                                                                                                                                                                                                                                                                                                                                                                                                                                                                                                                                                                                                                                                                                                                                                                                                                                                                                                                                                                                                                                                                                                                                                                                                                                                                                                                                                                                                                                                                                                                                                                                                                                                                                                                                                                                                                                                                                                                                                                                                                                                                                                                                                                                                                                                                                                                                                                                                                                                                                                                                                                                                                                                                                                                                                                                                                                                                                                                                                                                                                                                                                                                                                                                                                                                                                                                                                                                                                                                                                                                                                                                                                                                                                                                                                                                                                                                                                                                                                                                                                                                                                                                                                                                                                                                                                                                                                                                                                                                                                                                                                                                                                                                                                                                                                                                                                                                                                                                                                                                                                                                                                                                                                                                                                                     | Infection and Immunology, Translational Health Science and Technology Institute                                              | Infection and Immunology, Translational Health Science and Technology Institute                                              | Maurya,R., Agrawal,T., Saraswat,S., Ananthraj,A., Chandele,A., Kumar,S., Kanakan,A., Chattopadhyay,P., Swaminathan,A., Saifi,S., Shashi,P., Pandey,R. and Medigeshi,G.R.                                  |                                                                                                                                              |
| EPI_ISL_17450893                                                                                                                                                                                                                                                                                                                                                                                                                                                                                                                                                                                                                                                                                                                                                                                                                                                                                                                                                                                                                                                                                                                                                                                                                                                                                                                                                                                                                                                                                                                                                                                                                                                                                                                                                                                                                                                                                                                                                                                                                                                                                                                                                                                                                                                                                                                                                                                                                                                                                                                                                                                                                                                                                                                                                                                                                                                                                                                                                                                                                                                                                                                                                                                                                                                                                                                                                                                                                                                                                                                                                                                                                                                                                                                                                                                                                                                                                                                                                                                                                                                                                                                                                                                                                                                                                                                                                                                                                                                                                                                                                                                                                                                                                                                                                                                                                                                                                                                                                                                                                                                                                                                                                                                                                                                                                                                                                                                                                                                                                                                                                                                                                                                                                                                                                                                                                                                                                                                                                                                                                                                                                                                                                                                     | Infection and Immunology, Translational Health Science and Technology Institute                                              | Infection and Immunology, Translational Health Science and Technology Institute                                              | Maurya,R., Agrawal,T., Saraswat,S., Ananthraj,A., Chandele,A., Kumar,S., Kanakan,A., Chattopadhyay,P., Swaminathan,A., Saifi,S., Shashi,P., Pandey,R. and Medigeshi,G.R.                                  |                                                                                                                                              |
| EPI_ISL_17450894, EPI_ISL_17450895, EPI_ISL_17450896, EPI_ISL_17450897, EPI_ISL_17450898, EPI_ISL_17450899                                                                                                                                                                                                                                                                                                                                                                                                                                                                                                                                                                                                                                                                                                                                                                                                                                                                                                                                                                                                                                                                                                                                                                                                                                                                                                                                                                                                                                                                                                                                                                                                                                                                                                                                                                                                                                                                                                                                                                                                                                                                                                                                                                                                                                                                                                                                                                                                                                                                                                                                                                                                                                                                                                                                                                                                                                                                                                                                                                                                                                                                                                                                                                                                                                                                                                                                                                                                                                                                                                                                                                                                                                                                                                                                                                                                                                                                                                                                                                                                                                                                                                                                                                                                                                                                                                                                                                                                                                                                                                                                                                                                                                                                                                                                                                                                                                                                                                                                                                                                                                                                                                                                                                                                                                                                                                                                                                                                                                                                                                                                                                                                                                                                                                                                                                                                                                                                                                                                                                                                                                                                                           | Infection and Immunology, Translational Health Science and Technology Institute                                              | Infection and Immunology, Translational Health Science and Technology Institute                                              | Agrawal,T., Saraswat,S., Shashi,P., Ananthraj,A., Kumar,S., Chandele,A., Lodha,R., Singh,B. and Medigeshi,G.R.                                                                                            |                                                                                                                                              |
| EPI_ISL_17450900                                                                                                                                                                                                                                                                                                                                                                                                                                                                                                                                                                                                                                                                                                                                                                                                                                                                                                                                                                                                                                                                                                                                                                                                                                                                                                                                                                                                                                                                                                                                                                                                                                                                                                                                                                                                                                                                                                                                                                                                                                                                                                                                                                                                                                                                                                                                                                                                                                                                                                                                                                                                                                                                                                                                                                                                                                                                                                                                                                                                                                                                                                                                                                                                                                                                                                                                                                                                                                                                                                                                                                                                                                                                                                                                                                                                                                                                                                                                                                                                                                                                                                                                                                                                                                                                                                                                                                                                                                                                                                                                                                                                                                                                                                                                                                                                                                                                                                                                                                                                                                                                                                                                                                                                                                                                                                                                                                                                                                                                                                                                                                                                                                                                                                                                                                                                                                                                                                                                                                                                                                                                                                                                                                                     | Infection and Immunology, Translational Health Science and Technology Institute                                              | Infection and Immunology, Translational Health Science and Technology Institute                                              | Maurya,R., Agrawal,T., Saraswat,S., Ananthraj,A., Chandele,A., Kumar,S., Shashi,P., Singh,B., Lodha,R., Pandey,R. and Medigeshi,G.R.                                                                      |                                                                                                                                              |
| EPI_ISL_17450901, EPI_ISL_17450902                                                                                                                                                                                                                                                                                                                                                                                                                                                                                                                                                                                                                                                                                                                                                                                                                                                                                                                                                                                                                                                                                                                                                                                                                                                                                                                                                                                                                                                                                                                                                                                                                                                                                                                                                                                                                                                                                                                                                                                                                                                                                                                                                                                                                                                                                                                                                                                                                                                                                                                                                                                                                                                                                                                                                                                                                                                                                                                                                                                                                                                                                                                                                                                                                                                                                                                                                                                                                                                                                                                                                                                                                                                                                                                                                                                                                                                                                                                                                                                                                                                                                                                                                                                                                                                                                                                                                                                                                                                                                                                                                                                                                                                                                                                                                                                                                                                                                                                                                                                                                                                                                                                                                                                                                                                                                                                                                                                                                                                                                                                                                                                                                                                                                                                                                                                                                                                                                                                                                                                                                                                                                                                                                                   | Infection and Immunology, Translational Health Science and Technology Institute                                              | Infection and Immunology, Translational Health Science and Technology Institute                                              | Maurya,R., Agrawal,T., Saraswat,S., Ananthraj,A., Chandele,A., Kumar,S., Kanakan,A., Chattopadhyay,P., Swaminathan,A., Saifi,S., Shashi,P., Pandey,R. and Medigeshi,G.R.                                  |                                                                                                                                              |
| EPI_ISL_17450903, EPI_ISL_17450904                                                                                                                                                                                                                                                                                                                                                                                                                                                                                                                                                                                                                                                                                                                                                                                                                                                                                                                                                                                                                                                                                                                                                                                                                                                                                                                                                                                                                                                                                                                                                                                                                                                                                                                                                                                                                                                                                                                                                                                                                                                                                                                                                                                                                                                                                                                                                                                                                                                                                                                                                                                                                                                                                                                                                                                                                                                                                                                                                                                                                                                                                                                                                                                                                                                                                                                                                                                                                                                                                                                                                                                                                                                                                                                                                                                                                                                                                                                                                                                                                                                                                                                                                                                                                                                                                                                                                                                                                                                                                                                                                                                                                                                                                                                                                                                                                                                                                                                                                                                                                                                                                                                                                                                                                                                                                                                                                                                                                                                                                                                                                                                                                                                                                                                                                                                                                                                                                                                                                                                                                                                                                                                                                                   | Infection and Immunology, Translational Health Science and Technology Institute                                              | Infection and Immunology, Translational Health Science and Technology Institute                                              | Agrawal,T., Saraswat,S., Shashi,P., Ananthraj,A., Kumar,S., Chandele,A., Lodha,R., Singh,B. and Medigeshi,G.R.                                                                                            |                                                                                                                                              |
| EPI_ISL_17450905                                                                                                                                                                                                                                                                                                                                                                                                                                                                                                                                                                                                                                                                                                                                                                                                                                                                                                                                                                                                                                                                                                                                                                                                                                                                                                                                                                                                                                                                                                                                                                                                                                                                                                                                                                                                                                                                                                                                                                                                                                                                                                                                                                                                                                                                                                                                                                                                                                                                                                                                                                                                                                                                                                                                                                                                                                                                                                                                                                                                                                                                                                                                                                                                                                                                                                                                                                                                                                                                                                                                                                                                                                                                                                                                                                                                                                                                                                                                                                                                                                                                                                                                                                                                                                                                                                                                                                                                                                                                                                                                                                                                                                                                                                                                                                                                                                                                                                                                                                                                                                                                                                                                                                                                                                                                                                                                                                                                                                                                                                                                                                                                                                                                                                                                                                                                                                                                                                                                                                                                                                                                                                                                                                                     | Infection and Immunology, Translational Health Science and Technology Institute                                              | Infection and Immunology, Translational Health Science and Technology Institute                                              | Maurya,R., Agrawal,T., Saraswat,S., Ananthraj,A., Chandele,A., Kumar,S., Kanakan,A., Chattopadhyay,P., Swaminathan,A., Saifi,S., Shashi,P., Pandey,R. and Medigeshi,G.R.                                  |                                                                                                                                              |
| EPI_ISL_17450906                                                                                                                                                                                                                                                                                                                                                                                                                                                                                                                                                                                                                                                                                                                                                                                                                                                                                                                                                                                                                                                                                                                                                                                                                                                                                                                                                                                                                                                                                                                                                                                                                                                                                                                                                                                                                                                                                                                                                                                                                                                                                                                                                                                                                                                                                                                                                                                                                                                                                                                                                                                                                                                                                                                                                                                                                                                                                                                                                                                                                                                                                                                                                                                                                                                                                                                                                                                                                                                                                                                                                                                                                                                                                                                                                                                                                                                                                                                                                                                                                                                                                                                                                                                                                                                                                                                                                                                                                                                                                                                                                                                                                                                                                                                                                                                                                                                                                                                                                                                                                                                                                                                                                                                                                                                                                                                                                                                                                                                                                                                                                                                                                                                                                                                                                                                                                                                                                                                                                                                                                                                                                                                                                                                     | Infection and Immunology, Translational Health Science and Technology Institute                                              | Infection and Immunology, Translational Health Science and Technology Institute                                              | Agrawal,T., Saraswat,S., Shashi,P., Ananthraj,A., Kumar,S., Chandele,A., Lodha,R., Singh,B. and Medigeshi,G.R.                                                                                            |                                                                                                                                              |
| EPI_ISL_17450907                                                                                                                                                                                                                                                                                                                                                                                                                                                                                                                                                                                                                                                                                                                                                                                                                                                                                                                                                                                                                                                                                                                                                                                                                                                                                                                                                                                                                                                                                                                                                                                                                                                                                                                                                                                                                                                                                                                                                                                                                                                                                                                                                                                                                                                                                                                                                                                                                                                                                                                                                                                                                                                                                                                                                                                                                                                                                                                                                                                                                                                                                                                                                                                                                                                                                                                                                                                                                                                                                                                                                                                                                                                                                                                                                                                                                                                                                                                                                                                                                                                                                                                                                                                                                                                                                                                                                                                                                                                                                                                                                                                                                                                                                                                                                                                                                                                                                                                                                                                                                                                                                                                                                                                                                                                                                                                                                                                                                                                                                                                                                                                                                                                                                                                                                                                                                                                                                                                                                                                                                                                                                                                                                                                     | Infection and Immunology, Translational Health Science and Technology Institute                                              | Infection and Immunology, Translational Health Science and Technology Institute                                              | Kumar,P., Shashi,P., Singh,B., Verma,C.K., Tripathi,A., Chandele,A., Lodha,R. and Medigeshi,G.R.                                                                                                          |                                                                                                                                              |
| EPI_ISL_17450908, EPI_ISL_17450909                                                                                                                                                                                                                                                                                                                                                                                                                                                                                                                                                                                                                                                                                                                                                                                                                                                                                                                                                                                                                                                                                                                                                                                                                                                                                                                                                                                                                                                                                                                                                                                                                                                                                                                                                                                                                                                                                                                                                                                                                                                                                                                                                                                                                                                                                                                                                                                                                                                                                                                                                                                                                                                                                                                                                                                                                                                                                                                                                                                                                                                                                                                                                                                                                                                                                                                                                                                                                                                                                                                                                                                                                                                                                                                                                                                                                                                                                                                                                                                                                                                                                                                                                                                                                                                                                                                                                                                                                                                                                                                                                                                                                                                                                                                                                                                                                                                                                                                                                                                                                                                                                                                                                                                                                                                                                                                                                                                                                                                                                                                                                                                                                                                                                                                                                                                                                                                                                                                                                                                                                                                                                                                                                                   | Infection and Immunology, Translational Health Science and Technology Institute                                              | Infection and Immunology, Translational Health Science and Technology Institute                                              | Verma,C.K., Shashi,P., Singh,B., Kumar,P., Tripathi,A., Chandele,A., Lodha,R. and Medigeshi,G.R.                                                                                                          |                                                                                                                                              |
| EPI_ISL_17450910, EPI_ISL_17450911                                                                                                                                                                                                                                                                                                                                                                                                                                                                                                                                                                                                                                                                                                                                                                                                                                                                                                                                                                                                                                                                                                                                                                                                                                                                                                                                                                                                                                                                                                                                                                                                                                                                                                                                                                                                                                                                                                                                                                                                                                                                                                                                                                                                                                                                                                                                                                                                                                                                                                                                                                                                                                                                                                                                                                                                                                                                                                                                                                                                                                                                                                                                                                                                                                                                                                                                                                                                                                                                                                                                                                                                                                                                                                                                                                                                                                                                                                                                                                                                                                                                                                                                                                                                                                                                                                                                                                                                                                                                                                                                                                                                                                                                                                                                                                                                                                                                                                                                                                                                                                                                                                                                                                                                                                                                                                                                                                                                                                                                                                                                                                                                                                                                                                                                                                                                                                                                                                                                                                                                                                                                                                                                                                   | Infection and Immunology, Translational Health Science and Technology Institute                                              | Infection and Immunology, Translational Health Science and Technology Institute                                              | Maurya,R., Agrawal,T., Saraswat,S., Ananthraj,A., Chandele,A., Kumar,S., Kanakan,A., Chattopadhyay,P., Swaminathan,A., Saifi,S., Shashi,P., Pandey,R. and Medigeshi,G.R.                                  |                                                                                                                                              |
| EPI_ISL_17450912                                                                                                                                                                                                                                                                                                                                                                                                                                                                                                                                                                                                                                                                                                                                                                                                                                                                                                                                                                                                                                                                                                                                                                                                                                                                                                                                                                                                                                                                                                                                                                                                                                                                                                                                                                                                                                                                                                                                                                                                                                                                                                                                                                                                                                                                                                                                                                                                                                                                                                                                                                                                                                                                                                                                                                                                                                                                                                                                                                                                                                                                                                                                                                                                                                                                                                                                                                                                                                                                                                                                                                                                                                                                                                                                                                                                                                                                                                                                                                                                                                                                                                                                                                                                                                                                                                                                                                                                                                                                                                                                                                                                                                                                                                                                                                                                                                                                                                                                                                                                                                                                                                                                                                                                                                                                                                                                                                                                                                                                                                                                                                                                                                                                                                                                                                                                                                                                                                                                                                                                                                                                                                                                                                                     | Infection and Immunology, Translational Health Science and Technology Institute                                              | Infection and Immunology, Translational Health Science and Technology Institute                                              | Agrawal,T., Saraswat,S., Shashi,P., Ananthraj,A., Kumar,S., Chandele,A., Lodha,R., Singh,B. and Medigeshi,G.R.                                                                                            |                                                                                                                                              |
| EPI_ISL_17450913                                                                                                                                                                                                                                                                                                                                                                                                                                                                                                                                                                                                                                                                                                                                                                                                                                                                                                                                                                                                                                                                                                                                                                                                                                                                                                                                                                                                                                                                                                                                                                                                                                                                                                                                                                                                                                                                                                                                                                                                                                                                                                                                                                                                                                                                                                                                                                                                                                                                                                                                                                                                                                                                                                                                                                                                                                                                                                                                                                                                                                                                                                                                                                                                                                                                                                                                                                                                                                                                                                                                                                                                                                                                                                                                                                                                                                                                                                                                                                                                                                                                                                                                                                                                                                                                                                                                                                                                                                                                                                                                                                                                                                                                                                                                                                                                                                                                                                                                                                                                                                                                                                                                                                                                                                                                                                                                                                                                                                                                                                                                                                                                                                                                                                                                                                                                                                                                                                                                                                                                                                                                                                                                                                                     | Infection and Immunology, Translational Health Science and Technology Institute                                              | Infection and Immunology, Translational Health Science and Technology Institute                                              | Kumar,P., Shashi,P., Singh,B., Verma,C.K., Tripathi,A., Chandele,A., Lodha,R. and Medigeshi,G.R.                                                                                                          |                                                                                                                                              |
| EPI_ISL_17498037, EPI_ISL_17498038                                                                                                                                                                                                                                                                                                                                                                                                                                                                                                                                                                                                                                                                                                                                                                                                                                                                                                                                                                                                                                                                                                                                                                                                                                                                                                                                                                                                                                                                                                                                                                                                                                                                                                                                                                                                                                                                                                                                                                                                                                                                                                                                                                                                                                                                                                                                                                                                                                                                                                                                                                                                                                                                                                                                                                                                                                                                                                                                                                                                                                                                                                                                                                                                                                                                                                                                                                                                                                                                                                                                                                                                                                                                                                                                                                                                                                                                                                                                                                                                                                                                                                                                                                                                                                                                                                                                                                                                                                                                                                                                                                                                                                                                                                                                                                                                                                                                                                                                                                                                                                                                                                                                                                                                                                                                                                                                                                                                                                                                                                                                                                                                                                                                                                                                                                                                                                                                                                                                                                                                                                                                                                                                                                   | Center for devices and radiological health - US Food and Drug Administration                                                 | Center for devices and radiological health - US Food and Drug Administration                                                 | Rios,M., Fares-Gusmao,R., Volkova,E., Grinev,A., Assis,F., Chancey,C., Ok,S., Rocha,B., Sippert,E., Tallon,L., Sadzewicz,L., Vavikolanu,K., Mehta,A., Aluvathingal,J., Nadenila,S., Yan,Y. and Sichtig,H. |                                                                                                                                              |
| EPI_ISL_17498073, EPI_ISL_17498074, EPI_ISL_17498075, EPI_ISL_17498076, EPI_ISL_17498077, EPI_ISL_17498078, EPI_ISL_17498079, EPI_ISL_17498080, EPI_ISL_17498081, EPI_ISL_17498082, EPI_ISL_17498083, EPI_ISL_17498084, EPI_ISL_17498085, EPI_ISL_17498086, EPI_ISL_17498087, EPI_ISL_17498088, EPI_ISL_17498089, EPI_ISL_17498090, EPI_ISL_17498091, EPI_ISL_17498092, EPI_ISL_17498093, EPI_ISL_17498094, EPI_ISL_17498095, EPI_ISL_17498096, EPI_ISL_17498097, EPI_ISL_17498098, EPI_ISL_17498099, EPI_ISL_17498100, EPI_ISL_17498101, EPI_ISL_17498102, EPI_ISL_17498103, EPI_ISL_17498104, EPI_ISL_17498105, EPI_ISL_17498106, EPI_ISL_17498107, EPI_ISL_17498108, EPI_ISL_17498109, EPI_ISL_17498110, EPI_ISL_17498111, EPI_ISL_17498112, EPI_ISL_17498113, EPI_ISL_17498114, EPI_ISL_17498115, EPI_ISL_17498116, EPI_ISL_17498117, EPI_ISL_17498118, EPI_ISL_17498119, EPI_ISL_17498120, EPI_ISL_17498121, EPI_ISL_17498122, EPI_ISL_17498123, EPI_ISL_17498124, EPI_ISL_17498125, EPI_ISL_17498126, EPI_ISL_17498127, EPI_ISL_17498128, EPI_ISL_17498129, EPI_ISL_17498130, EPI_ISL_17498131, EPI_ISL_17498132, EPI_ISL_17498133, EPI_ISL_17498134, EPI_ISL_17498135, EPI_ISL_17498136, EPI_ISL_17498137, EPI_ISL_17498138, EPI_ISL_17498139, EPI_ISL_17498140, EPI_ISL_17498141, EPI_ISL_17498142, EPI_ISL_17498143, EPI_ISL_17498144, EPI_ISL_17498145, EPI_ISL_17498146, EPI_ISL_17498147, EPI_ISL_17498148, EPI_ISL_17498149, EPI_ISL_17498150, EPI_ISL_17498151, EPI_ISL_17498152, EPI_ISL_17498153, EPI_ISL_17498154, EPI_ISL_17498155, EPI_ISL_17498156, EPI_ISL_17498157, EPI_ISL_17498158, EPI_ISL_17498159, EPI_ISL_17498160                                                                                                                                                                                                                                                                                                                                                                                                                                                                                                                                                                                                                                                                                                                                                                                                                                                                                                                                                                                                                                                                                                                                                                                                                                                                                                                                                                                                                                                                                                                                                                                                                                                                                                                                                                                                                                                                                                                                                                                                                                                                                                                                                                                                                                                                                                                                                                                                                                                                                                                                                                                                                                                                                                                                                                                                                                                                                                                                                                                                                                                                                                                                                                                                                                                                                                                                                                                                                                                                                                                                                                                                                                                                                                                                                                                                                                                                                                                                                                                                                                                                                                                                                                                                                                                                                                                                                                                                                                                                                                                                                       | Centers for Disease Control and Prevention, Dengue Branch                                                                    | Centers for Disease Control and Prevention, Dengue Branch                                                                    | Santiago,G.A., Gonzalez-Morales,G., Flores,B., Charriez,K., Munoz-Jordan,J.L., Bunch,S., Cano,N., Jaber,R., Morrison,A., Panzera,C., Vergara,J., Zimler,R., Heberlein,L. and Kopp,E.                      |                                                                                                                                              |
| EPI_ISL_17498885                                                                                                                                                                                                                                                                                                                                                                                                                                                                                                                                                                                                                                                                                                                                                                                                                                                                                                                                                                                                                                                                                                                                                                                                                                                                                                                                                                                                                                                                                                                                                                                                                                                                                                                                                                                                                                                                                                                                                                                                                                                                                                                                                                                                                                                                                                                                                                                                                                                                                                                                                                                                                                                                                                                                                                                                                                                                                                                                                                                                                                                                                                                                                                                                                                                                                                                                                                                                                                                                                                                                                                                                                                                                                                                                                                                                                                                                                                                                                                                                                                                                                                                                                                                                                                                                                                                                                                                                                                                                                                                                                                                                                                                                                                                                                                                                                                                                                                                                                                                                                                                                                                                                                                                                                                                                                                                                                                                                                                                                                                                                                                                                                                                                                                                                                                                                                                                                                                                                                                                                                                                                                                                                                                                     | Infection and Immunology, Translational Health Science and Technology Institute                                              | Infection and Immunology, Translational Health Science and Technology Institute                                              | Verma,C.K., Shashi,P., Singh,B., Kumar,P., Tripathi,A., Chandele,A., Lodha,R. and Medigeshi,G.R.                                                                                                          |                                                                                                                                              |
| EPI_ISL_17498976, EPI_ISL_17498977, EPI_ISL_17498978, EPI_ISL_17498979, EPI_ISL_17498980, EPI_ISL_17498981, EPI_ISL_17498982, EPI_ISL_17498983, EPI_ISL_17498984, EPI_ISL_17498985, EPI_ISL_17498986, EPI_ISL_17498987, EPI_ISL_17498988                                                                                                                                                                                                                                                                                                                                                                                                                                                                                                                                                                                                                                                                                                                                                                                                                                                                                                                                                                                                                                                                                                                                                                                                                                                                                                                                                                                                                                                                                                                                                                                                                                                                                                                                                                                                                                                                                                                                                                                                                                                                                                                                                                                                                                                                                                                                                                                                                                                                                                                                                                                                                                                                                                                                                                                                                                                                                                                                                                                                                                                                                                                                                                                                                                                                                                                                                                                                                                                                                                                                                                                                                                                                                                                                                                                                                                                                                                                                                                                                                                                                                                                                                                                                                                                                                                                                                                                                                                                                                                                                                                                                                                                                                                                                                                                                                                                                                                                                                                                                                                                                                                                                                                                                                                                                                                                                                                                                                                                                                                                                                                                                                                                                                                                                                                                                                                                                                                                                                             | see above                                                                                                                    | Jilin Medical College                                                                                                        | Liang,C.                                                                                                                                                                                                  |                                                                                                                                              |
| EPI_ISL_17499049                                                                                                                                                                                                                                                                                                                                                                                                                                                                                                                                                                                                                                                                                                                                                                                                                                                                                                                                                                                                                                                                                                                                                                                                                                                                                                                                                                                                                                                                                                                                                                                                                                                                                                                                                                                                                                                                                                                                                                                                                                                                                                                                                                                                                                                                                                                                                                                                                                                                                                                                                                                                                                                                                                                                                                                                                                                                                                                                                                                                                                                                                                                                                                                                                                                                                                                                                                                                                                                                                                                                                                                                                                                                                                                                                                                                                                                                                                                                                                                                                                                                                                                                                                                                                                                                                                                                                                                                                                                                                                                                                                                                                                                                                                                                                                                                                                                                                                                                                                                                                                                                                                                                                                                                                                                                                                                                                                                                                                                                                                                                                                                                                                                                                                                                                                                                                                                                                                                                                                                                                                                                                                                                                                                     | National Institutes of Allergy and Infectious Diseases, Laboratory of Malaria and Vector Research                            | National Institutes of Allergy and Infectious Diseases, Laboratory of Malaria and Vector Research                            | Oum,M., Chea,S., Lay,S., Bohl,J.A., Yek,C. and Manning,J.E.                                                                                                                                               |                                                                                                                                              |
| EPI_ISL_17499127, EPI_ISL_17499128, EPI_ISL_17499129, EPI_ISL_17499130, EPI_ISL_17499131, EPI_ISL_17499132, EPI_ISL_17499133, EPI_ISL_17499134, EPI_ISL_17499135, EPI_ISL_17499136, EPI_ISL_17499137, EPI_ISL_17499138, EPI_ISL_17499139, EPI_ISL_17499140, EPI_ISL_17499141, EPI_ISL_17499142, EPI_ISL_17499143, EPI_ISL_17499144, EPI_ISL_17499145, EPI_ISL_17499146, EPI_ISL_17499147, EPI_ISL_17499148, EPI_ISL_17499149, EPI_ISL_17499150, EPI_ISL_17499151, EPI_ISL_17499152, EPI_ISL_17499153, EPI_ISL_17499154, EPI_ISL_17499155, EPI_ISL_17499156, EPI_ISL_17499157, EPI_ISL_17499158, EPI_ISL_17499159, EPI_ISL_17499160, EPI_ISL_17499161, EPI_ISL_17499162, EPI_ISL_17499163, EPI_ISL_17499164, EPI_ISL_17499165, EPI_ISL_17499166, EPI_ISL_17499167, EPI_ISL_17499168, EPI_ISL_17499169, EPI_ISL_17499170                                                                                                                                                                                                                                                                                                                                                                                                                                                                                                                                                                                                                                                                                                                                                                                                                                                                                                                                                                                                                                                                                                                                                                                                                                                                                                                                                                                                                                                                                                                                                                                                                                                                                                                                                                                                                                                                                                                                                                                                                                                                                                                                                                                                                                                                                                                                                                                                                                                                                                                                                                                                                                                                                                                                                                                                                                                                                                                                                                                                                                                                                                                                                                                                                                                                                                                                                                                                                                                                                                                                                                                                                                                                                                                                                                                                                                                                                                                                                                                                                                                                                                                                                                                                                                                                                                                                                                                                                                                                                                                                                                                                                                                                                                                                                                                                                                                                                                                                                                                                                                                                                                                                                                                                                                                                                                                                                                               | see above                                                                                                                    | U. S. Army Medical Component, Armed Forces Research Institute of Medical Sciences                                            | Binay Thapa,B., Gyetlshen,S., Klungthong,C., Zangmo,S., Wangchuk,S., Chinnawirotpisan,P., Manasatienki,W., Fernandez,S. and Jones,A.R.                                                                    |                                                                                                                                              |
| EPI_ISL_17568981, EPI_ISL_17568982                                                                                                                                                                                                                                                                                                                                                                                                                                                                                                                                                                                                                                                                                                                                                                                                                                                                                                                                                                                                                                                                                                                                                                                                                                                                                                                                                                                                                                                                                                                                                                                                                                                                                                                                                                                                                                                                                                                                                                                                                                                                                                                                                                                                                                                                                                                                                                                                                                                                                                                                                                                                                                                                                                                                                                                                                                                                                                                                                                                                                                                                                                                                                                                                                                                                                                                                                                                                                                                                                                                                                                                                                                                                                                                                                                                                                                                                                                                                                                                                                                                                                                                                                                                                                                                                                                                                                                                                                                                                                                                                                                                                                                                                                                                                                                                                                                                                                                                                                                                                                                                                                                                                                                                                                                                                                                                                                                                                                                                                                                                                                                                                                                                                                                                                                                                                                                                                                                                                                                                                                                                                                                                                                                   | General Sir John Kotelawala Defence University                                                                               | General Sir John Kotelawala Defence University                                                                               | Dassanayake,A.K.K., De Silva,D.A., Kariyawasam,C., De Silva,A., Fernando,A.N., Tippalagan,A. and Rajendran,A.                                                                                             |                                                                                                                                              |
| EPI_ISL_17572824, EPI_ISL_17572825, EPI_ISL_17572826, EPI_ISL_17572827, EPI_ISL_17572828, EPI_ISL_17572829                                                                                                                                                                                                                                                                                                                                                                                                                                                                                                                                                                                                                                                                                                                                                                                                                                                                                                                                                                                                                                                                                                                                                                                                                                                                                                                                                                                                                                                                                                                                                                                                                                                                                                                                                                                                                                                                                                                                                                                                                                                                                                                                                                                                                                                                                                                                                                                                                                                                                                                                                                                                                                                                                                                                                                                                                                                                                                                                                                                                                                                                                                                                                                                                                                                                                                                                                                                                                                                                                                                                                                                                                                                                                                                                                                                                                                                                                                                                                                                                                                                                                                                                                                                                                                                                                                                                                                                                                                                                                                                                                                                                                                                                                                                                                                                                                                                                                                                                                                                                                                                                                                                                                                                                                                                                                                                                                                                                                                                                                                                                                                                                                                                                                                                                                                                                                                                                                                                                                                                                                                                                                           | Unité de Mixte de Recherche, Processus Infectieux en Milieu Insulaire Tropical, Dynamique des Systèmes Infectieux Insulaires | Unité de Mixte de Recherche, Processus Infectieux en Milieu Insulaire Tropical, Dynamique des Systèmes Infectieux Insulaires | Hafia,S., Barbat,T., Winakona,A.D., Atyame,C., Bismocet,L., Bibi,J., Louange,M., Gedeon,J., De Santis,O., Falhaut,A., Cabie,A., Bertolotti,A. and Mavingui,P.                                             |                                                                                                                                              |
| EPI_ISL_17595688, EPI_ISL_17595689, EPI_ISL_17595691, EPI_ISL_17595692                                                                                                                                                                                                                                                                                                                                                                                                                                                                                                                                                                                                                                                                                                                                                                                                                                                                                                                                                                                                                                                                                                                                                                                                                                                                                                                                                                                                                                                                                                                                                                                                                                                                                                                                                                                                                                                                                                                                                                                                                                                                                                                                                                                                                                                                                                                                                                                                                                                                                                                                                                                                                                                                                                                                                                                                                                                                                                                                                                                                                                                                                                                                                                                                                                                                                                                                                                                                                                                                                                                                                                                                                                                                                                                                                                                                                                                                                                                                                                                                                                                                                                                                                                                                                                                                                                                                                                                                                                                                                                                                                                                                                                                                                                                                                                                                                                                                                                                                                                                                                                                                                                                                                                                                                                                                                                                                                                                                                                                                                                                                                                                                                                                                                                                                                                                                                                                                                                                                                                                                                                                                                                                               | Takeda Vaccines, Inc.                                                                                                        | Takeda Vaccines, Inc.                                                                                                        | Wallace,D.                                                                                                                                                                                                |                                                                                                                                              |
| EPI_ISL_17599631, EPI_ISL_17599632, EPI_ISL_17599633, EPI_ISL_17599634, EPI_ISL_17599635, EPI_ISL_17599636, EPI_ISL_17599637, EPI_ISL_17599638                                                                                                                                                                                                                                                                                                                                                                                                                                                                                                                                                                                                                                                                                                                                                                                                                                                                                                                                                                                                                                                                                                                                                                                                                                                                                                                                                                                                                                                                                                                                                                                                                                                                                                                                                                                                                                                                                                                                                                                                                                                                                                                                                                                                                                                                                                                                                                                                                                                                                                                                                                                                                                                                                                                                                                                                                                                                                                                                                                                                                                                                                                                                                                                                                                                                                                                                                                                                                                                                                                                                                                                                                                                                                                                                                                                                                                                                                                                                                                                                                                                                                                                                                                                                                                                                                                                                                                                                                                                                                                                                                                                                                                                                                                                                                                                                                                                                                                                                                                                                                                                                                                                                                                                                                                                                                                                                                                                                                                                                                                                                                                                                                                                                                                                                                                                                                                                                                                                                                                                                                                                       | ICMR- National Institute for Research in Environmental Health                                                                | ICMR- National Institute for Research in Environmental Health                                                                | Sarma,D.K., Rathod,L., Mishra,S., Das,D. and Prakash,A.                                                                                                                                                   |                                                                                                                                              |
| EPI_ISL_17599669, EPI_ISL_17599670, EPI_ISL_17599671, EPI_ISL_17599672, EPI_ISL_17599673, EPI_ISL_17599674, EPI_ISL_17599675, EPI_ISL_17599676, EPI_ISL_17599677, EPI_ISL_17599678, EPI_ISL_17599679, EPI_ISL_17599680, EPI_ISL_17599681, EPI_ISL_17599682, EPI_ISL_17599683, EPI_ISL_17599684, EPI_ISL_17599685, EPI_ISL_17599686, EPI_ISL_17599687, EPI_ISL_17599688, EPI_ISL_17599689, EPI_ISL_17599690, EPI_ISL_17599691, EPI_ISL_17599692, EPI_ISL_17599693, EPI_ISL_17599694, EPI_ISL_17599695, EPI_ISL_17599696, EPI_ISL_17599697, EPI_ISL_17599698, EPI_ISL_17599699, EPI_ISL_17599700, EPI_ISL_17599701, EPI_ISL_17599702, EPI_ISL_17599703, EPI_ISL_17599704, EPI_ISL_17599705, EPI_ISL_17599706, EPI_ISL_17599707, EPI_ISL_17599708, EPI_ISL_17599709, EPI_ISL_17599710, EPI_ISL_17599711, EPI_ISL_17599712, EPI_ISL_17599713, EPI_ISL_17599714, EPI_ISL_17599715, EPI_ISL_17599716, EPI_ISL_17599717, EPI_ISL_17599718, EPI_ISL_17599719, EPI_ISL_17599720, EPI_ISL_17599721, EPI_ISL_17599722, EPI_ISL_17599723, EPI_ISL_17599724, EPI_ISL_17599725, EPI_ISL_17599726, EPI_ISL_17599727, EPI_ISL_17599728, EPI_ISL_17599729, EPI_ISL_17599730, EPI_ISL_17599731, EPI_ISL_17599732, EPI_ISL_17599733, EPI_ISL_17599734, EPI_ISL_17599735, EPI_ISL_17599736, EPI_ISL_17599737, EPI_ISL_17599738, EPI_ISL_17599739, EPI_ISL_17599740, EPI_ISL_17599741, EPI_ISL_17599742, EPI_ISL_17599743, EPI_ISL_17599744, EPI_ISL_17599745, EPI_ISL_17599746, EPI_ISL_17599747, EPI_ISL_17599748, EPI_ISL_17599749, EPI_ISL_17599750, EPI_ISL_17599751, EPI_ISL_17599752, EPI_ISL_17599753, EPI_ISL_17599754, EPI_ISL_17599755, EPI_ISL_17599756, EPI_ISL_17599757, EPI_ISL_17599758, EPI_ISL_17599759, EPI_ISL_17599760, EPI_ISL_17599761, EPI_ISL_17599762, EPI_ISL_17599763, EPI_ISL_17599764, EPI_ISL_17599765, EPI_ISL_17599766, EPI_ISL_17599767, EPI_ISL_17599768, EPI_ISL_17599769, EPI_ISL_17599770, EPI_ISL_17599771, EPI_ISL_17599772, EPI_ISL_17599773, EPI_ISL_17599774, EPI_ISL_17599775, EPI_ISL_17599776, EPI_ISL_17599777, EPI_ISL_17599778, EPI_ISL_17599779, EPI_ISL_17599780, EPI_ISL_17599781, EPI_ISL_17599782, EPI_ISL_17599783, EPI_ISL_17599784, EPI_ISL_17599785, EPI_ISL_17599786, EPI_ISL_17599787, EPI_ISL_17599788, EPI_ISL_17599789, EPI_ISL_17599790, EPI_ISL_17599791, EPI_ISL_17599792, EPI_ISL_17599793, EPI_ISL_17599794, EPI_ISL_17599795, EPI_ISL_17599796, EPI_ISL_17599797, EPI_ISL_17599798, EPI_ISL_17599799, EPI_ISL_17599800, EPI_ISL_17599801, EPI_ISL_17599802, EPI_ISL_17599803, EPI_ISL_17599804, EPI_ISL_17599805, EPI_ISL_17599806, EPI_ISL_17599807, EPI_ISL_17599808, EPI_ISL_17599809, EPI_ISL_17599810, EPI_ISL_17599811, EPI_ISL_17599812, EPI_ISL_17599813, EPI_ISL_17599814, EPI_ISL_17599815, EPI_ISL_17599816, EPI_ISL_17599817, EPI_ISL_17599818, EPI_ISL_17599819, EPI_ISL_17599820, EPI_ISL_17599821, EPI_ISL_17599822, EPI_ISL_17599823, EPI_ISL_17599824, EPI_ISL_17599825, EPI_ISL_17599826, EPI_ISL_17599827, EPI_ISL_17599828, EPI_ISL_17599829, EPI_ISL_17599830, EPI_ISL_17599831, EPI_ISL_17599832, EPI_ISL_17599833, EPI_ISL_17599834, EPI_ISL_17599835, EPI_ISL_17599836, EPI_ISL_17599837, EPI_ISL_17599838, EPI_ISL_17599839, EPI_ISL_17599840, EPI_ISL_17599841, EPI_ISL_17599842, EPI_ISL_17599843, EPI_ISL_17599844, EPI_ISL_17599845, EPI_ISL_17599846, EPI_ISL_17599847, EPI_ISL_17599848, EPI_ISL_17599849, EPI_ISL_17599850, EPI_ISL_17599851, EPI_ISL_17599852, EPI_ISL_17599853, EPI_ISL_17599854, EPI_ISL_17599855, EPI_ISL_17599856, EPI_ISL_17599857, EPI_ISL_17599858, EPI_ISL_17599859, EPI_ISL_17599860, EPI_ISL_17599861, EPI_ISL_17599862, EPI_ISL_17599863, EPI_ISL_17599864, EPI_ISL_17599865, EPI_ISL_17599866, EPI_ISL_17599867, EPI_ISL_17599868, EPI_ISL_17599869, EPI_ISL_17599870, EPI_ISL_17599871, EPI_ISL_17599872, EPI_ISL_17599873, EPI_ISL_17599874, EPI_ISL_17599875, EPI_ISL_17599876, EPI_ISL_17599877, EPI_ISL_17599878, EPI_ISL_17599879, EPI_ISL_17599880, EPI_ISL_17599881, EPI_ISL_17599882, EPI_ISL_17599883, EPI_ISL_17599884, EPI_ISL_17599885, EPI_ISL_17599886, EPI_ISL_17599887, EPI_ISL_17599888, EPI_ISL_17599889, EPI_ISL_17599890, EPI_ISL_17599891, EPI_ISL_17599892, EPI_ISL_17599893, EPI_ISL_17599894, EPI_ISL_17599895, EPI_ISL_17599896, EPI_ISL_17599897, EPI_ISL_17599898, EPI_ISL_17599899, EPI_ISL_17599900, EPI_ISL_17599901, EPI_ISL_17599902, EPI_ISL_17599903, EPI_ISL_17599904, EPI_ISL_17599905, EPI_ISL_17599906, EPI_ISL_17599907, EPI_ISL_17599908, EPI_ISL_17599909, EPI_ISL_17599910, EPI_ISL_17599911, EPI_ISL_17599912, EPI_ISL_17599913, EPI_ISL_17599914, EPI_ISL_17599915, EPI_ISL_17599916, EPI_ISL_17599917, EPI_ISL_17599918, EPI_ISL_17599919, EPI_ISL_17599920, EPI_ISL_17599921, EPI_ISL_17599922, EPI_ISL_17599923, EPI_ISL_17599924, EPI_ISL_17599925, EPI_ISL_17599926, EPI_ISL_17599927, EPI_ISL_17599928, EPI_ISL_17599929, EPI_ISL_17599930, EPI_ISL_17599931, EPI_ISL_17599932, EPI_ISL_17599933, EPI_ISL_17599934, EPI_ISL_17599935, EPI_ISL_17599936, EPI_ISL_17599937, EPI_ISL_17599938, EPI_ISL_17599939, EPI_ISL_17599940, EPI_ISL_17599941, EPI_ISL_17599942, EPI_ISL_17599943, EPI_ISL_17599944, EPI_ISL_17599945, EPI_ISL_17599946, EPI_ISL_17599947, EPI_ISL_17599948, EPI_ISL_17599949, EPI_ISL_17599950, EPI_ISL_17599951, EPI_ISL_17599952, EPI_ISL_17599953, EPI_ISL_17599954, EPI_ISL_17599955, EPI_ISL_17599956, EPI_ISL_17599957, EPI_ISL_17599958, EPI_ISL_17599959, EPI_ISL_17599960, EPI_ISL_17599961, EPI_ISL_17599962, EPI_ISL_17599963, EPI_ISL_17599964, EPI_ISL_17599965, EPI_ISL_17599966, EPI_ISL_17599967, EPI_ISL_17599968, EPI_ISL_17599969, EPI_ISL_17599970, EPI_ISL_17599971, EPI_ISL_17599972, EPI_ISL_17599973, EPI_ISL_17599974, EPI_ISL_17599975, EPI_ISL_17599976, EPI_ISL_17599977, EPI_ISL_17599978, EPI_ISL_17599979, EPI_ISL_17599980, EPI_ISL_17599981, EPI_ISL_17599982, EPI_ISL_17599983, EPI_ISL_17599984, EPI_ISL_17599985, EPI_ISL_17599986, EPI_ISL_17599987, EPI_ISL_17599988, EPI_ISL_17599989, EPI_ISL_17599990, EPI_ISL_17599991, EPI_ISL_17599992, EPI_ISL_17599993, EPI_ISL_17599994, EPI_ISL_17599995, EPI_ISL_17599996, EPI_ISL_17599997, EPI_ISL_17599998, EPI_ISL_17599999 | see above                                                                                                                    | National Health Laboratory                                                                                                   | National Health Laboratory                                                                                                                                                                                | Kelly,M.E., Msafiri,F., Affara,M., Gehre,F., Moreni,N., Mghamba,J., Misinzo,G., Gatei,W., Whistler,T., Joachim,A., Lema,N. and Santiago,G.A. |
| EPI_ISL_17600403                                                                                                                                                                                                                                                                                                                                                                                                                                                                                                                                                                                                                                                                                                                                                                                                                                                                                                                                                                                                                                                                                                                                                                                                                                                                                                                                                                                                                                                                                                                                                                                                                                                                                                                                                                                                                                                                                                                                                                                                                                                                                                                                                                                                                                                                                                                                                                                                                                                                                                                                                                                                                                                                                                                                                                                                                                                                                                                                                                                                                                                                                                                                                                                                                                                                                                                                                                                                                                                                                                                                                                                                                                                                                                                                                                                                                                                                                                                                                                                                                                                                                                                                                                                                                                                                                                                                                                                                                                                                                                                                                                                                                                                                                                                                                                                                                                                                                                                                                                                                                                                                                                                                                                                                                                                                                                                                                                                                                                                                                                                                                                                                                                                                                                                                                                                                                                                                                                                                                                                                                                                                                                                                                                                     | Universidade de Cordoba                                                                                                      | Universidade de Cordoba                                                                                                      | Rivero,R., Paternina,D., Tique,V. and Mattar,S.                                                                                                                                                           |                                                                                                                                              |
| EPI_ISL_17600404                                                                                                                                                                                                                                                                                                                                                                                                                                                                                                                                                                                                                                                                                                                                                                                                                                                                                                                                                                                                                                                                                                                                                                                                                                                                                                                                                                                                                                                                                                                                                                                                                                                                                                                                                                                                                                                                                                                                                                                                                                                                                                                                                                                                                                                                                                                                                                                                                                                                                                                                                                                                                                                                                                                                                                                                                                                                                                                                                                                                                                                                                                                                                                                                                                                                                                                                                                                                                                                                                                                                                                                                                                                                                                                                                                                                                                                                                                                                                                                                                                                                                                                                                                                                                                                                                                                                                                                                                                                                                                                                                                                                                                                                                                                                                                                                                                                                                                                                                                                                                                                                                                                                                                                                                                                                                                                                                                                                                                                                                                                                                                                                                                                                                                                                                                                                                                                                                                                                                                                                                                                                                                                                                                                     | Centers for Disease Control and Prevention, Dengue Branch                                                                    | Centers for Disease Control and Prevention, Dengue Branch                                                                    | Santiago,G.A., Gonzalez-Morales,G.L., Charriez,K.N., Flores,B., Chow,A., Newsom,M., Mendoza,S., Poujivaiva,K., Fitzpatrick,K. and Munoz-Jordan,J.L.                                                       |                                                                                                                                              |
| EPI_ISL_17600405                                                                                                                                                                                                                                                                                                                                                                                                                                                                                                                                                                                                                                                                                                                                                                                                                                                                                                                                                                                                                                                                                                                                                                                                                                                                                                                                                                                                                                                                                                                                                                                                                                                                                                                                                                                                                                                                                                                                                                                                                                                                                                                                                                                                                                                                                                                                                                                                                                                                                                                                                                                                                                                                                                                                                                                                                                                                                                                                                                                                                                                                                                                                                                                                                                                                                                                                                                                                                                                                                                                                                                                                                                                                                                                                                                                                                                                                                                                                                                                                                                                                                                                                                                                                                                                                                                                                                                                                                                                                                                                                                                                                                                                                                                                                                                                                                                                                                                                                                                                                                                                                                                                                                                                                                                                                                                                                                                                                                                                                                                                                                                                                                                                                                                                                                                                                                                                                                                                                                                                                                                                                                                                                                                                     | Centers for Disease Control and Prevention,                                                                                  | Centers for Disease Control and Prevention, Dengue                                                                           | Santiago,G.A., Gonzalez-Morales,G., Flores,B., Charriez,K.N., Falcon,J. and Munoz-Jordan,J.L.                                                                                                             |                                                                                                                                              |



| Diseases                                                                                                                                                                                                                                                                                                                                                                                                                                                                                                                                                                                                                                                                                                                                                                                                                                                                                                                                                                                                                                                                                                                                                                                                                                                                                                                                                                                                                                                                                                                                                                                                                                                                                                                                                                                                                                                                                                                                                                                                                                                                                                                                                                                                                                                                                                                                                                                                                                                                                                                                                                                                                                                                                                                                                                                                                                                                                                                                                                                                                                                                                                                                                                                                                                                                                                                                                                                                                                                                                                                                                                                                                                                                                                                                                                                                                                                                                                                                                                                                                                                                                                                                                                                                                                                                                                                                                                                                                                                                                                                                                                                                                                                                                                                                                                                                                                                                                                                                                                                                                                                                                                                                                                                                                                                                                                                                                                                                                                                                                                                                                                                                                                                                                                                                                                                                                                                                                                                                                                                                                                                                                                                                                                                                                                                                                                                                                                                                                                                                                                                                                                                                                                                                                                                                                                                                                                                                                                                                                                                                                                                                                                                                                                                                                                                                                                                                                                                                                                                                                                                                                                                                                                                                                                                                                                                                                                                                                                                                                                                                                                                                                                                                                                                                                                                                                                                                                                                                                                                                                                                                                                                                                                                                                                                                                                                                                                                                                                                                                                                                                                                                                                                                                                                                                                                                                                                                                                                                                                                                                                                                                                                                                                                                                                                                                                                                                                                                                                                                                                                                                                                                                                                                                                                                                                                                                                                                                                                                                                                                                                                                                                                                                                                                                                                                                                                                                                                                                                                                                                                                                                                                                                                                                                                                   |                                                                                                          |                                                                                                                      |                                                                                                                                                                                                                                                                                                                   |                                                                                                           |  |
|------------------------------------------------------------------------------------------------------------------------------------------------------------------------------------------------------------------------------------------------------------------------------------------------------------------------------------------------------------------------------------------------------------------------------------------------------------------------------------------------------------------------------------------------------------------------------------------------------------------------------------------------------------------------------------------------------------------------------------------------------------------------------------------------------------------------------------------------------------------------------------------------------------------------------------------------------------------------------------------------------------------------------------------------------------------------------------------------------------------------------------------------------------------------------------------------------------------------------------------------------------------------------------------------------------------------------------------------------------------------------------------------------------------------------------------------------------------------------------------------------------------------------------------------------------------------------------------------------------------------------------------------------------------------------------------------------------------------------------------------------------------------------------------------------------------------------------------------------------------------------------------------------------------------------------------------------------------------------------------------------------------------------------------------------------------------------------------------------------------------------------------------------------------------------------------------------------------------------------------------------------------------------------------------------------------------------------------------------------------------------------------------------------------------------------------------------------------------------------------------------------------------------------------------------------------------------------------------------------------------------------------------------------------------------------------------------------------------------------------------------------------------------------------------------------------------------------------------------------------------------------------------------------------------------------------------------------------------------------------------------------------------------------------------------------------------------------------------------------------------------------------------------------------------------------------------------------------------------------------------------------------------------------------------------------------------------------------------------------------------------------------------------------------------------------------------------------------------------------------------------------------------------------------------------------------------------------------------------------------------------------------------------------------------------------------------------------------------------------------------------------------------------------------------------------------------------------------------------------------------------------------------------------------------------------------------------------------------------------------------------------------------------------------------------------------------------------------------------------------------------------------------------------------------------------------------------------------------------------------------------------------------------------------------------------------------------------------------------------------------------------------------------------------------------------------------------------------------------------------------------------------------------------------------------------------------------------------------------------------------------------------------------------------------------------------------------------------------------------------------------------------------------------------------------------------------------------------------------------------------------------------------------------------------------------------------------------------------------------------------------------------------------------------------------------------------------------------------------------------------------------------------------------------------------------------------------------------------------------------------------------------------------------------------------------------------------------------------------------------------------------------------------------------------------------------------------------------------------------------------------------------------------------------------------------------------------------------------------------------------------------------------------------------------------------------------------------------------------------------------------------------------------------------------------------------------------------------------------------------------------------------------------------------------------------------------------------------------------------------------------------------------------------------------------------------------------------------------------------------------------------------------------------------------------------------------------------------------------------------------------------------------------------------------------------------------------------------------------------------------------------------------------------------------------------------------------------------------------------------------------------------------------------------------------------------------------------------------------------------------------------------------------------------------------------------------------------------------------------------------------------------------------------------------------------------------------------------------------------------------------------------------------------------------------------------------------------------------------------------------------------------------------------------------------------------------------------------------------------------------------------------------------------------------------------------------------------------------------------------------------------------------------------------------------------------------------------------------------------------------------------------------------------------------------------------------------------------------------------------------------------------------------------------------------------------------------------------------------------------------------------------------------------------------------------------------------------------------------------------------------------------------------------------------------------------------------------------------------------------------------------------------------------------------------------------------------------------------------------------------------------------------------------------------------------------------------------------------------------------------------------------------------------------------------------------------------------------------------------------------------------------------------------------------------------------------------------------------------------------------------------------------------------------------------------------------------------------------------------------------------------------------------------------------------------------------------------------------------------------------------------------------------------------------------------------------------------------------------------------------------------------------------------------------------------------------------------------------------------------------------------------------------------------------------------------------------------------------------------------------------------------------------------------------------------------------------------------------------------------------------------------------------------------------------------------------------------------------------------------------------------------------------------------------------------------------------------------------------------------------------------------------------------------------------------------------------------------------------------------------------------------------------------------------------------------------------------------------------------------------------------------------------------------------------------------------------------------------------------------------------------------------------------------------------------------------------------------------------------------------------------------------------------------------------------------------------------------------------------------------------------------------------------------------------------------------------------------------------------------------------------------------------------------------------------------------------------------------------------------------------------------------------------------------------------------------------------------------------------------------------------------------------------------------------------------------------------------------------------------------------------------------------------------------------------------------------------------------------------------------------------------------------------------------------------------------------------------------------------------------------------------------------------------------------------------------------------------------------------------------------------------------------------------------------------------------------------------------------------------------------------------------------------------------------------------------------------------------------------------------------------------------------------------------------------------------------------|----------------------------------------------------------------------------------------------------------|----------------------------------------------------------------------------------------------------------------------|-------------------------------------------------------------------------------------------------------------------------------------------------------------------------------------------------------------------------------------------------------------------------------------------------------------------|-----------------------------------------------------------------------------------------------------------|--|
| EPI_ISL_17600872                                                                                                                                                                                                                                                                                                                                                                                                                                                                                                                                                                                                                                                                                                                                                                                                                                                                                                                                                                                                                                                                                                                                                                                                                                                                                                                                                                                                                                                                                                                                                                                                                                                                                                                                                                                                                                                                                                                                                                                                                                                                                                                                                                                                                                                                                                                                                                                                                                                                                                                                                                                                                                                                                                                                                                                                                                                                                                                                                                                                                                                                                                                                                                                                                                                                                                                                                                                                                                                                                                                                                                                                                                                                                                                                                                                                                                                                                                                                                                                                                                                                                                                                                                                                                                                                                                                                                                                                                                                                                                                                                                                                                                                                                                                                                                                                                                                                                                                                                                                                                                                                                                                                                                                                                                                                                                                                                                                                                                                                                                                                                                                                                                                                                                                                                                                                                                                                                                                                                                                                                                                                                                                                                                                                                                                                                                                                                                                                                                                                                                                                                                                                                                                                                                                                                                                                                                                                                                                                                                                                                                                                                                                                                                                                                                                                                                                                                                                                                                                                                                                                                                                                                                                                                                                                                                                                                                                                                                                                                                                                                                                                                                                                                                                                                                                                                                                                                                                                                                                                                                                                                                                                                                                                                                                                                                                                                                                                                                                                                                                                                                                                                                                                                                                                                                                                                                                                                                                                                                                                                                                                                                                                                                                                                                                                                                                                                                                                                                                                                                                                                                                                                                                                                                                                                                                                                                                                                                                                                                                                                                                                                                                                                                                                                                                                                                                                                                                                                                                                                                                                                                                                                                                                                                                           | Laboratory of Malaria and Vector Research, National Institute of Allergy and Infectious Diseases         | Laboratory of Malaria and Vector Research, National Institute of Allergy and Infectious Diseases                     | Bohl,J.A., Lay,S., Chea,S., Ah Yong,V., Parker,D.M., Gallagher,S., Fintzi,J., Man,S., Ponce,A., Sreng,S., Kong,D., Oliveira,F., Kalantar,K., Tan,M., Fahs Bender,L., Sheu,J., Neff,N., Detweiler,A.M., Yek,C., Ly,S., Sath,R., Huch,C., Kry,H., Leang,R., Huy,R., Lon,C., Tato,C.M., DeRisi,J.L. and Manning,J.E. |                                                                                                           |  |
| EPI_ISL_17600873                                                                                                                                                                                                                                                                                                                                                                                                                                                                                                                                                                                                                                                                                                                                                                                                                                                                                                                                                                                                                                                                                                                                                                                                                                                                                                                                                                                                                                                                                                                                                                                                                                                                                                                                                                                                                                                                                                                                                                                                                                                                                                                                                                                                                                                                                                                                                                                                                                                                                                                                                                                                                                                                                                                                                                                                                                                                                                                                                                                                                                                                                                                                                                                                                                                                                                                                                                                                                                                                                                                                                                                                                                                                                                                                                                                                                                                                                                                                                                                                                                                                                                                                                                                                                                                                                                                                                                                                                                                                                                                                                                                                                                                                                                                                                                                                                                                                                                                                                                                                                                                                                                                                                                                                                                                                                                                                                                                                                                                                                                                                                                                                                                                                                                                                                                                                                                                                                                                                                                                                                                                                                                                                                                                                                                                                                                                                                                                                                                                                                                                                                                                                                                                                                                                                                                                                                                                                                                                                                                                                                                                                                                                                                                                                                                                                                                                                                                                                                                                                                                                                                                                                                                                                                                                                                                                                                                                                                                                                                                                                                                                                                                                                                                                                                                                                                                                                                                                                                                                                                                                                                                                                                                                                                                                                                                                                                                                                                                                                                                                                                                                                                                                                                                                                                                                                                                                                                                                                                                                                                                                                                                                                                                                                                                                                                                                                                                                                                                                                                                                                                                                                                                                                                                                                                                                                                                                                                                                                                                                                                                                                                                                                                                                                                                                                                                                                                                                                                                                                                                                                                                                                                                                                                                                           | Laboratory of Malaria and Vector Research, National Institute of Allergy and Infectious Diseases         | Laboratory of Malaria and Vector Research, National Institute of Allergy and Infectious Diseases                     |                                                                                                                                                                                                                                                                                                                   | Oum,M., Lay,S., Chea,S., Bohl,J.A., Yek,C. and Manning,J.E.                                               |  |
| EPI_ISL_17600874                                                                                                                                                                                                                                                                                                                                                                                                                                                                                                                                                                                                                                                                                                                                                                                                                                                                                                                                                                                                                                                                                                                                                                                                                                                                                                                                                                                                                                                                                                                                                                                                                                                                                                                                                                                                                                                                                                                                                                                                                                                                                                                                                                                                                                                                                                                                                                                                                                                                                                                                                                                                                                                                                                                                                                                                                                                                                                                                                                                                                                                                                                                                                                                                                                                                                                                                                                                                                                                                                                                                                                                                                                                                                                                                                                                                                                                                                                                                                                                                                                                                                                                                                                                                                                                                                                                                                                                                                                                                                                                                                                                                                                                                                                                                                                                                                                                                                                                                                                                                                                                                                                                                                                                                                                                                                                                                                                                                                                                                                                                                                                                                                                                                                                                                                                                                                                                                                                                                                                                                                                                                                                                                                                                                                                                                                                                                                                                                                                                                                                                                                                                                                                                                                                                                                                                                                                                                                                                                                                                                                                                                                                                                                                                                                                                                                                                                                                                                                                                                                                                                                                                                                                                                                                                                                                                                                                                                                                                                                                                                                                                                                                                                                                                                                                                                                                                                                                                                                                                                                                                                                                                                                                                                                                                                                                                                                                                                                                                                                                                                                                                                                                                                                                                                                                                                                                                                                                                                                                                                                                                                                                                                                                                                                                                                                                                                                                                                                                                                                                                                                                                                                                                                                                                                                                                                                                                                                                                                                                                                                                                                                                                                                                                                                                                                                                                                                                                                                                                                                                                                                                                                                                                                                                                           | Laboratory of Malaria and Vector Research, National Institute of Allergy and Infectious Diseases         | Laboratory of Malaria and Vector Research, National Institute of Allergy and Infectious Diseases                     | Bohl,J.A., Lay,S., Chea,S., Ah Yong,V., Parker,D.M., Gallagher,S., Fintzi,J., Man,S., Ponce,A., Sreng,S., Kong,D., Oliveira,F., Kalantar,K., Tan,M., Fahs Bender,L., Sheu,J., Neff,N., Detweiler,A.M., Yek,C., Ly,S., Sath,R., Huch,C., Kry,H., Leang,R., Huy,R., Lon,C., Tato,C.M., DeRisi,J.L. and Manning,J.E. |                                                                                                           |  |
| EPI_ISL_17600888, EPI_ISL_17600889, EPI_ISL_17600890, EPI_ISL_17600891, EPI_ISL_17600892, EPI_ISL_17600893, EPI_ISL_17600894, EPI_ISL_17600895, EPI_ISL_17600896                                                                                                                                                                                                                                                                                                                                                                                                                                                                                                                                                                                                                                                                                                                                                                                                                                                                                                                                                                                                                                                                                                                                                                                                                                                                                                                                                                                                                                                                                                                                                                                                                                                                                                                                                                                                                                                                                                                                                                                                                                                                                                                                                                                                                                                                                                                                                                                                                                                                                                                                                                                                                                                                                                                                                                                                                                                                                                                                                                                                                                                                                                                                                                                                                                                                                                                                                                                                                                                                                                                                                                                                                                                                                                                                                                                                                                                                                                                                                                                                                                                                                                                                                                                                                                                                                                                                                                                                                                                                                                                                                                                                                                                                                                                                                                                                                                                                                                                                                                                                                                                                                                                                                                                                                                                                                                                                                                                                                                                                                                                                                                                                                                                                                                                                                                                                                                                                                                                                                                                                                                                                                                                                                                                                                                                                                                                                                                                                                                                                                                                                                                                                                                                                                                                                                                                                                                                                                                                                                                                                                                                                                                                                                                                                                                                                                                                                                                                                                                                                                                                                                                                                                                                                                                                                                                                                                                                                                                                                                                                                                                                                                                                                                                                                                                                                                                                                                                                                                                                                                                                                                                                                                                                                                                                                                                                                                                                                                                                                                                                                                                                                                                                                                                                                                                                                                                                                                                                                                                                                                                                                                                                                                                                                                                                                                                                                                                                                                                                                                                                                                                                                                                                                                                                                                                                                                                                                                                                                                                                                                                                                                                                                                                                                                                                                                                                                                                                                                                                                                                                                                                           | Virology, Oswaldo Cruz Foundation                                                                        | Virology, Oswaldo Cruz Foundation                                                                                    |                                                                                                                                                                                                                                                                                                                   | Mendonca,M.C.L., Cavalcanti,A.C., Camargo,A.C., Rodrigues,C.D., Fabri,A.A., Santos,C.C. and Filippis,A.M. |  |
| EPI_ISL_17600897, EPI_ISL_17600898, EPI_ISL_17600899, EPI_ISL_17600900, EPI_ISL_17600901, EPI_ISL_17600902, EPI_ISL_17600903, EPI_ISL_17600904, EPI_ISL_17600905                                                                                                                                                                                                                                                                                                                                                                                                                                                                                                                                                                                                                                                                                                                                                                                                                                                                                                                                                                                                                                                                                                                                                                                                                                                                                                                                                                                                                                                                                                                                                                                                                                                                                                                                                                                                                                                                                                                                                                                                                                                                                                                                                                                                                                                                                                                                                                                                                                                                                                                                                                                                                                                                                                                                                                                                                                                                                                                                                                                                                                                                                                                                                                                                                                                                                                                                                                                                                                                                                                                                                                                                                                                                                                                                                                                                                                                                                                                                                                                                                                                                                                                                                                                                                                                                                                                                                                                                                                                                                                                                                                                                                                                                                                                                                                                                                                                                                                                                                                                                                                                                                                                                                                                                                                                                                                                                                                                                                                                                                                                                                                                                                                                                                                                                                                                                                                                                                                                                                                                                                                                                                                                                                                                                                                                                                                                                                                                                                                                                                                                                                                                                                                                                                                                                                                                                                                                                                                                                                                                                                                                                                                                                                                                                                                                                                                                                                                                                                                                                                                                                                                                                                                                                                                                                                                                                                                                                                                                                                                                                                                                                                                                                                                                                                                                                                                                                                                                                                                                                                                                                                                                                                                                                                                                                                                                                                                                                                                                                                                                                                                                                                                                                                                                                                                                                                                                                                                                                                                                                                                                                                                                                                                                                                                                                                                                                                                                                                                                                                                                                                                                                                                                                                                                                                                                                                                                                                                                                                                                                                                                                                                                                                                                                                                                                                                                                                                                                                                                                                                                                                                           | Virus Laboratory, Indian Council of Medical Research, National Institute of Cholera and Enteric Diseases | Virus Laboratory, Indian Council of Medical Research, National Institute of Cholera and Enteric Diseases             |                                                                                                                                                                                                                                                                                                                   | Baskey,U., Verma,P., Ghosh,A. and Sadhukhan,P.C.                                                          |  |
| EPI_ISL_17609476                                                                                                                                                                                                                                                                                                                                                                                                                                                                                                                                                                                                                                                                                                                                                                                                                                                                                                                                                                                                                                                                                                                                                                                                                                                                                                                                                                                                                                                                                                                                                                                                                                                                                                                                                                                                                                                                                                                                                                                                                                                                                                                                                                                                                                                                                                                                                                                                                                                                                                                                                                                                                                                                                                                                                                                                                                                                                                                                                                                                                                                                                                                                                                                                                                                                                                                                                                                                                                                                                                                                                                                                                                                                                                                                                                                                                                                                                                                                                                                                                                                                                                                                                                                                                                                                                                                                                                                                                                                                                                                                                                                                                                                                                                                                                                                                                                                                                                                                                                                                                                                                                                                                                                                                                                                                                                                                                                                                                                                                                                                                                                                                                                                                                                                                                                                                                                                                                                                                                                                                                                                                                                                                                                                                                                                                                                                                                                                                                                                                                                                                                                                                                                                                                                                                                                                                                                                                                                                                                                                                                                                                                                                                                                                                                                                                                                                                                                                                                                                                                                                                                                                                                                                                                                                                                                                                                                                                                                                                                                                                                                                                                                                                                                                                                                                                                                                                                                                                                                                                                                                                                                                                                                                                                                                                                                                                                                                                                                                                                                                                                                                                                                                                                                                                                                                                                                                                                                                                                                                                                                                                                                                                                                                                                                                                                                                                                                                                                                                                                                                                                                                                                                                                                                                                                                                                                                                                                                                                                                                                                                                                                                                                                                                                                                                                                                                                                                                                                                                                                                                                                                                                                                                                                                                           | Center for Disease Control and Prevention of Henan Province                                              | Center for Disease Control and Prevention of Henan Province                                                          |                                                                                                                                                                                                                                                                                                                   | Li,D.X. and Li,Y.                                                                                         |  |
| EPI_ISL_17609477                                                                                                                                                                                                                                                                                                                                                                                                                                                                                                                                                                                                                                                                                                                                                                                                                                                                                                                                                                                                                                                                                                                                                                                                                                                                                                                                                                                                                                                                                                                                                                                                                                                                                                                                                                                                                                                                                                                                                                                                                                                                                                                                                                                                                                                                                                                                                                                                                                                                                                                                                                                                                                                                                                                                                                                                                                                                                                                                                                                                                                                                                                                                                                                                                                                                                                                                                                                                                                                                                                                                                                                                                                                                                                                                                                                                                                                                                                                                                                                                                                                                                                                                                                                                                                                                                                                                                                                                                                                                                                                                                                                                                                                                                                                                                                                                                                                                                                                                                                                                                                                                                                                                                                                                                                                                                                                                                                                                                                                                                                                                                                                                                                                                                                                                                                                                                                                                                                                                                                                                                                                                                                                                                                                                                                                                                                                                                                                                                                                                                                                                                                                                                                                                                                                                                                                                                                                                                                                                                                                                                                                                                                                                                                                                                                                                                                                                                                                                                                                                                                                                                                                                                                                                                                                                                                                                                                                                                                                                                                                                                                                                                                                                                                                                                                                                                                                                                                                                                                                                                                                                                                                                                                                                                                                                                                                                                                                                                                                                                                                                                                                                                                                                                                                                                                                                                                                                                                                                                                                                                                                                                                                                                                                                                                                                                                                                                                                                                                                                                                                                                                                                                                                                                                                                                                                                                                                                                                                                                                                                                                                                                                                                                                                                                                                                                                                                                                                                                                                                                                                                                                                                                                                                                                                           | Centers for Disease Control and Prevention, Arboviral Diseases Branch                                    | Centers for Disease Control and Prevention, Arboviral Diseases Branch                                                |                                                                                                                                                                                                                                                                                                                   | Hughes,H.R. and Russell,B.J.                                                                              |  |
| EPI_ISL_17609844                                                                                                                                                                                                                                                                                                                                                                                                                                                                                                                                                                                                                                                                                                                                                                                                                                                                                                                                                                                                                                                                                                                                                                                                                                                                                                                                                                                                                                                                                                                                                                                                                                                                                                                                                                                                                                                                                                                                                                                                                                                                                                                                                                                                                                                                                                                                                                                                                                                                                                                                                                                                                                                                                                                                                                                                                                                                                                                                                                                                                                                                                                                                                                                                                                                                                                                                                                                                                                                                                                                                                                                                                                                                                                                                                                                                                                                                                                                                                                                                                                                                                                                                                                                                                                                                                                                                                                                                                                                                                                                                                                                                                                                                                                                                                                                                                                                                                                                                                                                                                                                                                                                                                                                                                                                                                                                                                                                                                                                                                                                                                                                                                                                                                                                                                                                                                                                                                                                                                                                                                                                                                                                                                                                                                                                                                                                                                                                                                                                                                                                                                                                                                                                                                                                                                                                                                                                                                                                                                                                                                                                                                                                                                                                                                                                                                                                                                                                                                                                                                                                                                                                                                                                                                                                                                                                                                                                                                                                                                                                                                                                                                                                                                                                                                                                                                                                                                                                                                                                                                                                                                                                                                                                                                                                                                                                                                                                                                                                                                                                                                                                                                                                                                                                                                                                                                                                                                                                                                                                                                                                                                                                                                                                                                                                                                                                                                                                                                                                                                                                                                                                                                                                                                                                                                                                                                                                                                                                                                                                                                                                                                                                                                                                                                                                                                                                                                                                                                                                                                                                                                                                                                                                                                                                           | Laboratório Central do Estado do Paraná                                                                  | Instituto Leonidas e Maria Deane, FioCruz                                                                            | Presibella,M., Marques,N.F., Riediger,I.M., Victor Costa de Souza, Goncalves,L., Silva,D., Fernanda Oliveira do Nascimento, Mejia,M., Nascimento,V. and Naveca,F.                                                                                                                                                 |                                                                                                           |  |
| EPI_ISL_17609855, EPI_ISL_17609856                                                                                                                                                                                                                                                                                                                                                                                                                                                                                                                                                                                                                                                                                                                                                                                                                                                                                                                                                                                                                                                                                                                                                                                                                                                                                                                                                                                                                                                                                                                                                                                                                                                                                                                                                                                                                                                                                                                                                                                                                                                                                                                                                                                                                                                                                                                                                                                                                                                                                                                                                                                                                                                                                                                                                                                                                                                                                                                                                                                                                                                                                                                                                                                                                                                                                                                                                                                                                                                                                                                                                                                                                                                                                                                                                                                                                                                                                                                                                                                                                                                                                                                                                                                                                                                                                                                                                                                                                                                                                                                                                                                                                                                                                                                                                                                                                                                                                                                                                                                                                                                                                                                                                                                                                                                                                                                                                                                                                                                                                                                                                                                                                                                                                                                                                                                                                                                                                                                                                                                                                                                                                                                                                                                                                                                                                                                                                                                                                                                                                                                                                                                                                                                                                                                                                                                                                                                                                                                                                                                                                                                                                                                                                                                                                                                                                                                                                                                                                                                                                                                                                                                                                                                                                                                                                                                                                                                                                                                                                                                                                                                                                                                                                                                                                                                                                                                                                                                                                                                                                                                                                                                                                                                                                                                                                                                                                                                                                                                                                                                                                                                                                                                                                                                                                                                                                                                                                                                                                                                                                                                                                                                                                                                                                                                                                                                                                                                                                                                                                                                                                                                                                                                                                                                                                                                                                                                                                                                                                                                                                                                                                                                                                                                                                                                                                                                                                                                                                                                                                                                                                                                                                                                                                                         | King George's Medical University, Department of Microbiology                                             | King George's Medical University, Department of Microbiology                                                         |                                                                                                                                                                                                                                                                                                                   | Prakash,O.                                                                                                |  |
| EPI_ISL_17609857, EPI_ISL_17609858, EPI_ISL_17609859, EPI_ISL_17609860, EPI_ISL_17609861, EPI_ISL_17609862, EPI_ISL_17609863, EPI_ISL_17609864, EPI_ISL_17609865, EPI_ISL_17609866, EPI_ISL_17609867, EPI_ISL_17609868, EPI_ISL_17609869, EPI_ISL_17609870, EPI_ISL_17609871, EPI_ISL_17609872, EPI_ISL_17609873, EPI_ISL_17609874, EPI_ISL_17609875, EPI_ISL_17609876, EPI_ISL_17609877, EPI_ISL_17609878, EPI_ISL_17609879, EPI_ISL_17609880, EPI_ISL_17609881, EPI_ISL_17609882, EPI_ISL_17609883, EPI_ISL_17609884, EPI_ISL_17609885, EPI_ISL_17609886, EPI_ISL_17609887, EPI_ISL_17609888, EPI_ISL_17609889, EPI_ISL_17609890, EPI_ISL_17609891, EPI_ISL_17609892, EPI_ISL_17609893, EPI_ISL_17609894, EPI_ISL_17609895, EPI_ISL_17609896, EPI_ISL_17609897, EPI_ISL_17609898, EPI_ISL_17609899, EPI_ISL_17609900, EPI_ISL_17609901, EPI_ISL_17609902, EPI_ISL_17609903, EPI_ISL_17609904, EPI_ISL_17609905, EPI_ISL_17609906, EPI_ISL_17609907, EPI_ISL_17609908, EPI_ISL_17609909, EPI_ISL_17609910, EPI_ISL_17609911, EPI_ISL_17609912, EPI_ISL_17609913, EPI_ISL_17609914, EPI_ISL_17609915, EPI_ISL_17609916, EPI_ISL_17609917, EPI_ISL_17609918, EPI_ISL_17609919, EPI_ISL_17609920, EPI_ISL_17609921, EPI_ISL_17609922, EPI_ISL_17609923, EPI_ISL_17609924, EPI_ISL_17609925, EPI_ISL_17609926, EPI_ISL_17609927, EPI_ISL_17609928, EPI_ISL_17609929, EPI_ISL_17609930, EPI_ISL_17609931, EPI_ISL_17609932, EPI_ISL_17609933, EPI_ISL_17609934, EPI_ISL_17609935, EPI_ISL_17609936, EPI_ISL_17609937, EPI_ISL_17609938, EPI_ISL_17609939, EPI_ISL_17609940, EPI_ISL_17609941, EPI_ISL_17609942, EPI_ISL_17609943, EPI_ISL_17609944, EPI_ISL_17609945, EPI_ISL_17609946, EPI_ISL_17609947, EPI_ISL_17609948, EPI_ISL_17609949, EPI_ISL_17609950, EPI_ISL_17609951, EPI_ISL_17609952, EPI_ISL_17609953, EPI_ISL_17609954, EPI_ISL_17609955, EPI_ISL_17609956, EPI_ISL_17609957, EPI_ISL_17609958, EPI_ISL_17609959, EPI_ISL_17609960, EPI_ISL_17609961, EPI_ISL_17609962, EPI_ISL_17609963, EPI_ISL_17609964, EPI_ISL_17609965, EPI_ISL_17609966, EPI_ISL_17609967, EPI_ISL_17609968, EPI_ISL_17609969, EPI_ISL_17609970, EPI_ISL_17609971, EPI_ISL_17609972, EPI_ISL_17609973, EPI_ISL_17609974, EPI_ISL_17609975, EPI_ISL_17609976, EPI_ISL_17609977, EPI_ISL_17609978, EPI_ISL_17609979, EPI_ISL_17609980, EPI_ISL_17609981, EPI_ISL_17609982, EPI_ISL_17609983, EPI_ISL_17609984, EPI_ISL_17609985, EPI_ISL_17609986, EPI_ISL_17609987, EPI_ISL_17609988, EPI_ISL_17609989, EPI_ISL_17609990, EPI_ISL_17609991, EPI_ISL_17609992, EPI_ISL_17609993, EPI_ISL_17609994, EPI_ISL_17609995, EPI_ISL_17609996, EPI_ISL_17609997, EPI_ISL_17609998, EPI_ISL_17609999, EPI_ISL_17610000, EPI_ISL_17610001, EPI_ISL_17610002, EPI_ISL_17610003, EPI_ISL_17610004, EPI_ISL_17610005, EPI_ISL_17610006, EPI_ISL_17610007, EPI_ISL_17610008, EPI_ISL_17610009, EPI_ISL_17610010, EPI_ISL_17610011, EPI_ISL_17610012, EPI_ISL_17610013, EPI_ISL_17610014, EPI_ISL_17610015, EPI_ISL_17610016, EPI_ISL_17610017, EPI_ISL_17610018, EPI_ISL_17610019, EPI_ISL_17610020, EPI_ISL_17610021, EPI_ISL_17610022, EPI_ISL_17610023, EPI_ISL_17610024, EPI_ISL_17610025, EPI_ISL_17610026, EPI_ISL_17610027, EPI_ISL_17610028, EPI_ISL_17610029, EPI_ISL_17610030, EPI_ISL_17610031, EPI_ISL_17610032, EPI_ISL_17610033, EPI_ISL_17610034, EPI_ISL_17610035, EPI_ISL_17610036, EPI_ISL_17610037, EPI_ISL_17610038, EPI_ISL_17610039, EPI_ISL_17610040, EPI_ISL_17610041, EPI_ISL_17610042, EPI_ISL_17610043, EPI_ISL_17610044, EPI_ISL_17610045, EPI_ISL_17610046, EPI_ISL_17610047, EPI_ISL_17610048, EPI_ISL_17610049, EPI_ISL_17610050, EPI_ISL_17610051, EPI_ISL_17610052, EPI_ISL_17610053, EPI_ISL_17610054, EPI_ISL_17610055, EPI_ISL_17610056, EPI_ISL_17610057, EPI_ISL_17610058, EPI_ISL_17610059, EPI_ISL_17610060, EPI_ISL_17610061, EPI_ISL_17610062, EPI_ISL_17610063, EPI_ISL_17610064, EPI_ISL_17610065, EPI_ISL_17610066, EPI_ISL_17610067, EPI_ISL_17610068, EPI_ISL_17610069, EPI_ISL_17610070, EPI_ISL_17610071, EPI_ISL_17610072, EPI_ISL_17610073, EPI_ISL_17610074, EPI_ISL_17610075, EPI_ISL_17610076, EPI_ISL_17610077, EPI_ISL_17610078, EPI_ISL_17610079, EPI_ISL_17610080, EPI_ISL_17610081, EPI_ISL_17610082, EPI_ISL_17610083, EPI_ISL_17610084, EPI_ISL_17610085, EPI_ISL_17610086, EPI_ISL_17610087, EPI_ISL_17610088, EPI_ISL_17610089, EPI_ISL_17610090, EPI_ISL_17610091, EPI_ISL_17610092, EPI_ISL_17610093, EPI_ISL_17610094, EPI_ISL_17610095, EPI_ISL_17610096, EPI_ISL_17610097, EPI_ISL_17610098, EPI_ISL_17610099, EPI_ISL_17610100, EPI_ISL_17610101, EPI_ISL_17610102, EPI_ISL_17610103, EPI_ISL_17610104, EPI_ISL_17610105, EPI_ISL_17610106, EPI_ISL_17610107, EPI_ISL_17610108, EPI_ISL_17610109, EPI_ISL_17610110, EPI_ISL_17610111, EPI_ISL_17610112, EPI_ISL_17610113, EPI_ISL_17610114, EPI_ISL_17610115, EPI_ISL_17610116, EPI_ISL_17610117, EPI_ISL_17610118, EPI_ISL_17610119, EPI_ISL_17610120, EPI_ISL_17610121, EPI_ISL_17610122, EPI_ISL_17610123, EPI_ISL_17610124, EPI_ISL_17610125, EPI_ISL_17610126, EPI_ISL_17610127, EPI_ISL_17610128, EPI_ISL_17610129, EPI_ISL_17610130, EPI_ISL_17610131, EPI_ISL_17610132, EPI_ISL_17610133, EPI_ISL_17610134, EPI_ISL_17610135, EPI_ISL_17610136, EPI_ISL_17610137, EPI_ISL_17610138, EPI_ISL_17610139, EPI_ISL_17610140, EPI_ISL_17610141, EPI_ISL_17610142, EPI_ISL_17610143, EPI_ISL_17610144, EPI_ISL_17610145, EPI_ISL_17610146, EPI_ISL_17610147, EPI_ISL_17610148, EPI_ISL_17610149, EPI_ISL_17610150, EPI_ISL_17610151, EPI_ISL_17610152, EPI_ISL_17610153, EPI_ISL_17610154, EPI_ISL_17610155, EPI_ISL_17610156, EPI_ISL_17610157, EPI_ISL_17610158, EPI_ISL_17610159, EPI_ISL_17610160, EPI_ISL_17610161, EPI_ISL_17610162, EPI_ISL_17610163, EPI_ISL_17610164, EPI_ISL_17610165, EPI_ISL_17610166, EPI_ISL_17610167, EPI_ISL_17610168, EPI_ISL_17610169, EPI_ISL_17610170, EPI_ISL_17610171, EPI_ISL_17610172, EPI_ISL_17610173, EPI_ISL_17610174, EPI_ISL_17610175, EPI_ISL_17610176, EPI_ISL_17610177, EPI_ISL_17610178, EPI_ISL_17610179, EPI_ISL_17610180, EPI_ISL_17610181, EPI_ISL_17610182, EPI_ISL_17610183, EPI_ISL_17610184, EPI_ISL_17610185, EPI_ISL_17610186, EPI_ISL_17610187, EPI_ISL_17610188, EPI_ISL_17610189, EPI_ISL_17610190, EPI_ISL_17610191, EPI_ISL_17610192, EPI_ISL_17610193, EPI_ISL_17610194, EPI_ISL_17610195, EPI_ISL_17610196, EPI_ISL_17610197, EPI_ISL_17610198, EPI_ISL_17610199, EPI_ISL_17610200, EPI_ISL_17610201, EPI_ISL_17610202, EPI_ISL_17610203, EPI_ISL_17610204, EPI_ISL_17610205, EPI_ISL_17610206, EPI_ISL_17610207, EPI_ISL_17610208, EPI_ISL_17610209, EPI_ISL_17610210, EPI_ISL_17610211, EPI_ISL_17610212, EPI_ISL_17610213, EPI_ISL_17610214, EPI_ISL_17610215, EPI_ISL_17610216, EPI_ISL_17610217, EPI_ISL_17610218, EPI_ISL_17610219, EPI_ISL_17610220, EPI_ISL_17610221, EPI_ISL_17610222, EPI_ISL_17610223, EPI_ISL_17610224, EPI_ISL_17610225, EPI_ISL_17610226, EPI_ISL_17610227, EPI_ISL_17610228, EPI_ISL_17610229, EPI_ISL_17610230, EPI_ISL_17610231, EPI_ISL_17610232, EPI_ISL_17610233, EPI_ISL_17610234, EPI_ISL_17610235, EPI_ISL_17610236, EPI_ISL_17610237, EPI_ISL_17610238, EPI_ISL_17610239, EPI_ISL_17610240, EPI_ISL_17610241, EPI_ISL_17610242, EPI_ISL_17610243, EPI_ISL_17610244, EPI_ISL_17610245, EPI_ISL_17610246, EPI_ISL_17610247, EPI_ISL_17610248, EPI_ISL_17610249, EPI_ISL_17610250, EPI_ISL_17610251, EPI_ISL_17610252, EPI_ISL_17610253, EPI_ISL_17610254, EPI_ISL_17610255, EPI_ISL_17610256, EPI_ISL_17610257, EPI_ISL_17610258, EPI_ISL_17610259, EPI_ISL_17610260, EPI_ISL_17610261, EPI_ISL_17610262, EPI_ISL_17610263, EPI_ISL_17610264, EPI_ISL_17610265, EPI_ISL_17610266, EPI_ISL_17610267, EPI_ISL_17610268, EPI_ISL_17610269, EPI_ISL_17610270, EPI_ISL_17610271, EPI_ISL_17610272, EPI_ISL_17610273, EPI_ISL_17610274, EPI_ISL_17610275, EPI_ISL_17610276, EPI_ISL_17610277, EPI_ISL_17610278, EPI_ISL_17610279, EPI_ISL_17610280, EPI_ISL_17610281, EPI_ISL_17610282, EPI_ISL_17610283, EPI_ISL_17610284, EPI_ISL_17610285, EPI_ISL_17610286, EPI_ISL_17610287, EPI_ISL_17610288, EPI_ISL_17610289, EPI_ISL_17610290, EPI_ISL_17610291, EPI_ISL_17610292, EPI_ISL_17610293, EPI_ISL_17610294, EPI_ISL_17610295, EPI_ISL_17610296, EPI_ISL_17610297, EPI_ISL_17610298, EPI_ISL_17610299, EPI_ISL_17610300, EPI_ISL_17610301, EPI_ISL_17610302, EPI_ISL_17610303, EPI_ISL_17610304, EPI_ISL_17610305, EPI_ISL_17610306, EPI_ISL_17610307, EPI_ISL_17610308, EPI_ISL_17610309, EPI_ISL_17610310, EPI_ISL_17610311, EPI_ISL_17610312, EPI_ISL_17610313, EPI_ISL_17610314, EPI_ISL_17610315, EPI_ISL_17610316, EPI_ISL_17610317, EPI_ISL_17610318, EPI_ISL_17610319, EPI_ISL_17610320, EPI_ISL_17610321, EPI_ISL_17610322, EPI_ISL_17610323, EPI_ISL_17610324, EPI_ISL_17610325, EPI_ISL_17610326, EPI_ISL_17610327, EPI_ISL_17610328, EPI_ISL_17610329, EPI_ISL_17610330, EPI_ISL_17610331, EPI_ISL_17610332, EPI_ISL_17610333, EPI_ISL_17610334, EPI_ISL_17610335, EPI_ISL_17610336, EPI_ISL_17610337, EPI_ISL_17610338, EPI_ISL_17610339, EPI_ISL_17610340, EPI_ISL_17610341, EPI_ISL_17610342, EPI_ISL_17610343, EPI_ISL_17610344, EPI_ISL_17610345, EPI_ISL_17610346, EPI_ISL_17610347, EPI_ISL_17610348, EPI_ISL_17610349, EPI_ISL_17610350, EPI_ISL_17610351, EPI_ISL_17610352, EPI_ISL_17610353, EPI_ISL_17610354, EPI_ISL_17610355, EPI_ISL_17610356, EPI_ISL_17610357, EPI_ISL_17610358, EPI_ISL_17610359, EPI_ISL_17610360, EPI_ISL_17610361, EPI_ISL_17610362, EPI_ISL_17610363, EPI_ISL_17610364, EPI_ISL_17610365, EPI_ISL_17610366, EPI_ISL_17610367, EPI_ISL_17610368, EPI_ISL_17610369, EPI_ISL_17610370, EPI_ISL_17610371, EPI_ISL_17610372, EPI_ISL_17610373, EPI_ISL_17610374, EPI_ISL_17610375, EPI_ISL_17610376, EPI_ISL_17610377, EPI_ISL_17610378, EPI_ISL_17610379, EPI_ISL_17610380, EPI_ISL_17610381, EPI_ISL_17610382, EPI_ISL_17610383, EPI_ISL_17610384, EPI_ISL_17610385, EPI_ISL_17610386, EPI_ISL_17610387, EPI_ISL_17610388, EPI_ISL_17610389, EPI_ISL_17610390, EPI_ISL_17610391, EPI_ISL_17610392, EPI_ISL_17610393, EPI_ISL_17610394, EPI_ISL_17610395, EPI_ISL_17610396, EPI_ISL_17610397, EPI_ISL_17610398, EPI_ISL_17610399, EPI_ISL_17610400, EPI_ISL_17610401, EPI_ISL_17610402, EPI_ISL_17610403, EPI_ISL_17610404, EPI_ISL_17610405, EPI_ISL_17610406, EPI_ISL_17610407, EPI_ISL_17610408, EPI_ISL_17610409, EPI_ISL_17610410, EPI_ISL_17610411, EPI_ISL_17610412, EPI_ISL_17610413, EPI_ISL_17610414, EPI_ISL_17610415, EPI_ISL_17610416, EPI_ISL_17610417, EPI_ISL_17610418, EPI_ISL_17610419, EPI_ISL_17610420, EPI_ISL_17610421, EPI_ISL_17610422, EPI_ISL_17610423, EPI_ISL_17610424, EPI_ISL_17610425, EPI_ISL_17610426, EPI_ISL_17610427, EPI_ISL_17610428, EPI_ISL_17610429, EPI_ISL_17610430, EPI_ISL_17610431, EPI_ISL_17610432, EPI_ISL_17610433, EPI_ISL_17610434, EPI_ISL_17610435, EPI_ISL_17610436, EPI_ISL_17610437, EPI_ISL_17610438, EPI_ISL_17610439, EPI_ISL_17610440, EPI_ISL_17610441, EPI_ISL_17610442, EPI_ISL_17610443, EPI_ISL_17610444, EPI_ISL_17610445, EPI_ISL_17610446, EPI_ISL_17610447, EPI_ISL_17610448, EPI_ISL_17610449, EPI_ISL_17610450, EPI_ISL_17610451, EPI_ISL_17610452, EPI_ISL_17610453, EPI_ISL_17610454 |                                                                                                          |                                                                                                                      |                                                                                                                                                                                                                                                                                                                   |                                                                                                           |  |
| see above                                                                                                                                                                                                                                                                                                                                                                                                                                                                                                                                                                                                                                                                                                                                                                                                                                                                                                                                                                                                                                                                                                                                                                                                                                                                                                                                                                                                                                                                                                                                                                                                                                                                                                                                                                                                                                                                                                                                                                                                                                                                                                                                                                                                                                                                                                                                                                                                                                                                                                                                                                                                                                                                                                                                                                                                                                                                                                                                                                                                                                                                                                                                                                                                                                                                                                                                                                                                                                                                                                                                                                                                                                                                                                                                                                                                                                                                                                                                                                                                                                                                                                                                                                                                                                                                                                                                                                                                                                                                                                                                                                                                                                                                                                                                                                                                                                                                                                                                                                                                                                                                                                                                                                                                                                                                                                                                                                                                                                                                                                                                                                                                                                                                                                                                                                                                                                                                                                                                                                                                                                                                                                                                                                                                                                                                                                                                                                                                                                                                                                                                                                                                                                                                                                                                                                                                                                                                                                                                                                                                                                                                                                                                                                                                                                                                                                                                                                                                                                                                                                                                                                                                                                                                                                                                                                                                                                                                                                                                                                                                                                                                                                                                                                                                                                                                                                                                                                                                                                                                                                                                                                                                                                                                                                                                                                                                                                                                                                                                                                                                                                                                                                                                                                                                                                                                                                                                                                                                                                                                                                                                                                                                                                                                                                                                                                                                                                                                                                                                                                                                                                                                                                                                                                                                                                                                                                                                                                                                                                                                                                                                                                                                                                                                                                                                                                                                                                                                                                                                                                                                                                                                                                                                                                                                  | London School of Hygiene and Tropical Medicine                                                           | London School of Hygiene and Tropical Medicine                                                                       | Ashall,J., Shah,S., Biggs,J.R., Chang,R., Jafari,Y., Brady,O.J., Mai,H.K., Lien,L.T., Thai,H.D., Nhuyen,H.A.T., Anh,D., Iwasaki,C., Kitamura,N., Van Lock,M., Herrera-Taracena,G., Rasschaert,F., Van Wesenbeeck,L., Yoshida,L.-M., Hafalla,J.C.R., Hue,S. and Hibberd,M.L.                                       |                                                                                                           |  |
| EPI_ISL_17610808, EPI_ISL_17610809, EPI_ISL_17610810, EPI_ISL_17610811, EPI_ISL_17610812, EPI_ISL_17610813, EPI_ISL_17610814, EPI_ISL_17610815, EPI_ISL_17610816, EPI_ISL_17610817, EPI_ISL_17610818, EPI_ISL_17610819, EPI_ISL_17610820, EPI_ISL_17610821, EPI_ISL_17610822, EPI_ISL_17610823, EPI_ISL_17610824                                                                                                                                                                                                                                                                                                                                                                                                                                                                                                                                                                                                                                                                                                                                                                                                                                                                                                                                                                                                                                                                                                                                                                                                                                                                                                                                                                                                                                                                                                                                                                                                                                                                                                                                                                                                                                                                                                                                                                                                                                                                                                                                                                                                                                                                                                                                                                                                                                                                                                                                                                                                                                                                                                                                                                                                                                                                                                                                                                                                                                                                                                                                                                                                                                                                                                                                                                                                                                                                                                                                                                                                                                                                                                                                                                                                                                                                                                                                                                                                                                                                                                                                                                                                                                                                                                                                                                                                                                                                                                                                                                                                                                                                                                                                                                                                                                                                                                                                                                                                                                                                                                                                                                                                                                                                                                                                                                                                                                                                                                                                                                                                                                                                                                                                                                                                                                                                                                                                                                                                                                                                                                                                                                                                                                                                                                                                                                                                                                                                                                                                                                                                                                                                                                                                                                                                                                                                                                                                                                                                                                                                                                                                                                                                                                                                                                                                                                                                                                                                                                                                                                                                                                                                                                                                                                                                                                                                                                                                                                                                                                                                                                                                                                                                                                                                                                                                                                                                                                                                                                                                                                                                                                                                                                                                                                                                                                                                                                                                                                                                                                                                                                                                                                                                                                                                                                                                                                                                                                                                                                                                                                                                                                                                                                                                                                                                                                                                                                                                                                                                                                                                                                                                                                                                                                                                                                                                                                                                                                                                                                                                                                                                                                                                                                                                                                                                                                                                                           | see above                                                                                                | Sapporo Medical University, School of Medicine, Department of Hygiene                                                | Jahan,A., Shyamal,K., Aung,M.S. and Kobayashi,N.                                                                                                                                                                                                                                                                  |                                                                                                           |  |
| EPI_ISL_17611178, EPI_ISL_17611179, EPI_ISL_17611180, EPI_ISL_17611181, EPI_ISL_17611182, EPI_ISL_17611183                                                                                                                                                                                                                                                                                                                                                                                                                                                                                                                                                                                                                                                                                                                                                                                                                                                                                                                                                                                                                                                                                                                                                                                                                                                                                                                                                                                                                                                                                                                                                                                                                                                                                                                                                                                                                                                                                                                                                                                                                                                                                                                                                                                                                                                                                                                                                                                                                                                                                                                                                                                                                                                                                                                                                                                                                                                                                                                                                                                                                                                                                                                                                                                                                                                                                                                                                                                                                                                                                                                                                                                                                                                                                                                                                                                                                                                                                                                                                                                                                                                                                                                                                                                                                                                                                                                                                                                                                                                                                                                                                                                                                                                                                                                                                                                                                                                                                                                                                                                                                                                                                                                                                                                                                                                                                                                                                                                                                                                                                                                                                                                                                                                                                                                                                                                                                                                                                                                                                                                                                                                                                                                                                                                                                                                                                                                                                                                                                                                                                                                                                                                                                                                                                                                                                                                                                                                                                                                                                                                                                                                                                                                                                                                                                                                                                                                                                                                                                                                                                                                                                                                                                                                                                                                                                                                                                                                                                                                                                                                                                                                                                                                                                                                                                                                                                                                                                                                                                                                                                                                                                                                                                                                                                                                                                                                                                                                                                                                                                                                                                                                                                                                                                                                                                                                                                                                                                                                                                                                                                                                                                                                                                                                                                                                                                                                                                                                                                                                                                                                                                                                                                                                                                                                                                                                                                                                                                                                                                                                                                                                                                                                                                                                                                                                                                                                                                                                                                                                                                                                                                                                                                                 | University of Nebraska Medical Center, Department of Environmental, Agricultural and Occupational Health | University of Nebraska Medical Center, Department of Environmental, Agricultural and Occupational Health             | Agbodzi,B., Youssouf,B.S., Simo,F.B.N., Kumordjie,S., Yeboah,C., Mosore,M.-T., Bentil,R.E., Attram,N., Nimo-Paintsil,S., Fox,A.T., Bonney,J.H.K., Ampofo,W., Sanders,T., Wiley,M.R., Demanou,M. and Letizia,A.G.                                                                                                  |                                                                                                           |  |
| EPI_ISL_17611185                                                                                                                                                                                                                                                                                                                                                                                                                                                                                                                                                                                                                                                                                                                                                                                                                                                                                                                                                                                                                                                                                                                                                                                                                                                                                                                                                                                                                                                                                                                                                                                                                                                                                                                                                                                                                                                                                                                                                                                                                                                                                                                                                                                                                                                                                                                                                                                                                                                                                                                                                                                                                                                                                                                                                                                                                                                                                                                                                                                                                                                                                                                                                                                                                                                                                                                                                                                                                                                                                                                                                                                                                                                                                                                                                                                                                                                                                                                                                                                                                                                                                                                                                                                                                                                                                                                                                                                                                                                                                                                                                                                                                                                                                                                                                                                                                                                                                                                                                                                                                                                                                                                                                                                                                                                                                                                                                                                                                                                                                                                                                                                                                                                                                                                                                                                                                                                                                                                                                                                                                                                                                                                                                                                                                                                                                                                                                                                                                                                                                                                                                                                                                                                                                                                                                                                                                                                                                                                                                                                                                                                                                                                                                                                                                                                                                                                                                                                                                                                                                                                                                                                                                                                                                                                                                                                                                                                                                                                                                                                                                                                                                                                                                                                                                                                                                                                                                                                                                                                                                                                                                                                                                                                                                                                                                                                                                                                                                                                                                                                                                                                                                                                                                                                                                                                                                                                                                                                                                                                                                                                                                                                                                                                                                                                                                                                                                                                                                                                                                                                                                                                                                                                                                                                                                                                                                                                                                                                                                                                                                                                                                                                                                                                                                                                                                                                                                                                                                                                                                                                                                                                                                                                                                                                           | Uppsala University, Zoonosis Science Center                                                              | Uppsala University, Zoonosis Science Center                                                                          | Nguyen-Tien,T., Ling,J. and Lindahl,J.                                                                                                                                                                                                                                                                            |                                                                                                           |  |
| EPI_ISL_17611186                                                                                                                                                                                                                                                                                                                                                                                                                                                                                                                                                                                                                                                                                                                                                                                                                                                                                                                                                                                                                                                                                                                                                                                                                                                                                                                                                                                                                                                                                                                                                                                                                                                                                                                                                                                                                                                                                                                                                                                                                                                                                                                                                                                                                                                                                                                                                                                                                                                                                                                                                                                                                                                                                                                                                                                                                                                                                                                                                                                                                                                                                                                                                                                                                                                                                                                                                                                                                                                                                                                                                                                                                                                                                                                                                                                                                                                                                                                                                                                                                                                                                                                                                                                                                                                                                                                                                                                                                                                                                                                                                                                                                                                                                                                                                                                                                                                                                                                                                                                                                                                                                                                                                                                                                                                                                                                                                                                                                                                                                                                                                                                                                                                                                                                                                                                                                                                                                                                                                                                                                                                                                                                                                                                                                                                                                                                                                                                                                                                                                                                                                                                                                                                                                                                                                                                                                                                                                                                                                                                                                                                                                                                                                                                                                                                                                                                                                                                                                                                                                                                                                                                                                                                                                                                                                                                                                                                                                                                                                                                                                                                                                                                                                                                                                                                                                                                                                                                                                                                                                                                                                                                                                                                                                                                                                                                                                                                                                                                                                                                                                                                                                                                                                                                                                                                                                                                                                                                                                                                                                                                                                                                                                                                                                                                                                                                                                                                                                                                                                                                                                                                                                                                                                                                                                                                                                                                                                                                                                                                                                                                                                                                                                                                                                                                                                                                                                                                                                                                                                                                                                                                                                                                                                                                           | Virus Laboratory, Indian Council of Medical Research, National Institute of Cholera and Enteric Diseases | Virus Laboratory, Indian Council of Medical Research, National Institute of Cholera and Enteric Diseases             | Baskey,U., Verma,P., Ghosh,A. and Sadhukhan,P.C.                                                                                                                                                                                                                                                                  |                                                                                                           |  |
| EPI_ISL_17658722                                                                                                                                                                                                                                                                                                                                                                                                                                                                                                                                                                                                                                                                                                                                                                                                                                                                                                                                                                                                                                                                                                                                                                                                                                                                                                                                                                                                                                                                                                                                                                                                                                                                                                                                                                                                                                                                                                                                                                                                                                                                                                                                                                                                                                                                                                                                                                                                                                                                                                                                                                                                                                                                                                                                                                                                                                                                                                                                                                                                                                                                                                                                                                                                                                                                                                                                                                                                                                                                                                                                                                                                                                                                                                                                                                                                                                                                                                                                                                                                                                                                                                                                                                                                                                                                                                                                                                                                                                                                                                                                                                                                                                                                                                                                                                                                                                                                                                                                                                                                                                                                                                                                                                                                                                                                                                                                                                                                                                                                                                                                                                                                                                                                                                                                                                                                                                                                                                                                                                                                                                                                                                                                                                                                                                                                                                                                                                                                                                                                                                                                                                                                                                                                                                                                                                                                                                                                                                                                                                                                                                                                                                                                                                                                                                                                                                                                                                                                                                                                                                                                                                                                                                                                                                                                                                                                                                                                                                                                                                                                                                                                                                                                                                                                                                                                                                                                                                                                                                                                                                                                                                                                                                                                                                                                                                                                                                                                                                                                                                                                                                                                                                                                                                                                                                                                                                                                                                                                                                                                                                                                                                                                                                                                                                                                                                                                                                                                                                                                                                                                                                                                                                                                                                                                                                                                                                                                                                                                                                                                                                                                                                                                                                                                                                                                                                                                                                                                                                                                                                                                                                                                                                                                                                                           | Yanbian University                                                                                       | Yanbian University                                                                                                   | Li,C.                                                                                                                                                                                                                                                                                                             |                                                                                                           |  |
| EPI_ISL_17658723, EPI_ISL_17658724, EPI_ISL_17658725, EPI_ISL_17658726, EPI_ISL_17658727, EPI_ISL_17658728                                                                                                                                                                                                                                                                                                                                                                                                                                                                                                                                                                                                                                                                                                                                                                                                                                                                                                                                                                                                                                                                                                                                                                                                                                                                                                                                                                                                                                                                                                                                                                                                                                                                                                                                                                                                                                                                                                                                                                                                                                                                                                                                                                                                                                                                                                                                                                                                                                                                                                                                                                                                                                                                                                                                                                                                                                                                                                                                                                                                                                                                                                                                                                                                                                                                                                                                                                                                                                                                                                                                                                                                                                                                                                                                                                                                                                                                                                                                                                                                                                                                                                                                                                                                                                                                                                                                                                                                                                                                                                                                                                                                                                                                                                                                                                                                                                                                                                                                                                                                                                                                                                                                                                                                                                                                                                                                                                                                                                                                                                                                                                                                                                                                                                                                                                                                                                                                                                                                                                                                                                                                                                                                                                                                                                                                                                                                                                                                                                                                                                                                                                                                                                                                                                                                                                                                                                                                                                                                                                                                                                                                                                                                                                                                                                                                                                                                                                                                                                                                                                                                                                                                                                                                                                                                                                                                                                                                                                                                                                                                                                                                                                                                                                                                                                                                                                                                                                                                                                                                                                                                                                                                                                                                                                                                                                                                                                                                                                                                                                                                                                                                                                                                                                                                                                                                                                                                                                                                                                                                                                                                                                                                                                                                                                                                                                                                                                                                                                                                                                                                                                                                                                                                                                                                                                                                                                                                                                                                                                                                                                                                                                                                                                                                                                                                                                                                                                                                                                                                                                                                                                                                                                 | Department of Epidemiology of Microbial Diseases, Yale School of Public Health                           | Department of Epidemiology of Microbial Diseases, Yale School of Public Health                                       | Vogels,C.B.F., Breban,M.I., Chaguza,C., Hill,V., Paul,L., Michael,S., Bunch,S., Cano,N., Jaber,R., Morrison,A., Panzera,C., Stryker,I., Vergara,J., Zimler,R., Kopp,E., Herberlein,L. and Grubaugh,N.D.                                                                                                           |                                                                                                           |  |
| EPI_ISL_17658729, EPI_ISL_17658730, EPI_ISL_17658731, EPI_ISL_17658732, EPI_ISL_17658733, EPI_ISL_17658734, EPI_ISL_17658735, EPI_ISL_17658736, EPI_ISL_17658737, EPI_ISL_17658738, EPI_ISL_17658739, EPI_ISL_17658740, EPI_ISL_17658741                                                                                                                                                                                                                                                                                                                                                                                                                                                                                                                                                                                                                                                                                                                                                                                                                                                                                                                                                                                                                                                                                                                                                                                                                                                                                                                                                                                                                                                                                                                                                                                                                                                                                                                                                                                                                                                                                                                                                                                                                                                                                                                                                                                                                                                                                                                                                                                                                                                                                                                                                                                                                                                                                                                                                                                                                                                                                                                                                                                                                                                                                                                                                                                                                                                                                                                                                                                                                                                                                                                                                                                                                                                                                                                                                                                                                                                                                                                                                                                                                                                                                                                                                                                                                                                                                                                                                                                                                                                                                                                                                                                                                                                                                                                                                                                                                                                                                                                                                                                                                                                                                                                                                                                                                                                                                                                                                                                                                                                                                                                                                                                                                                                                                                                                                                                                                                                                                                                                                                                                                                                                                                                                                                                                                                                                                                                                                                                                                                                                                                                                                                                                                                                                                                                                                                                                                                                                                                                                                                                                                                                                                                                                                                                                                                                                                                                                                                                                                                                                                                                                                                                                                                                                                                                                                                                                                                                                                                                                                                                                                                                                                                                                                                                                                                                                                                                                                                                                                                                                                                                                                                                                                                                                                                                                                                                                                                                                                                                                                                                                                                                                                                                                                                                                                                                                                                                                                                                                                                                                                                                                                                                                                                                                                                                                                                                                                                                                                                                                                                                                                                                                                                                                                                                                                                                                                                                                                                                                                                                                                                                                                                                                                                                                                                                                                                                                                                                                                                                                                                   | see above                                                                                                | Institute of Medical Biology, Chinese Academy of Medical Sciences, Peking Union Medical College, Tsinghua University | Zhou,Y., Zhou,Y., Liyang,S., Wang,P., An,J. and Liu,H.                                                                                                                                                                                                                                                            |                                                                                                           |  |
| EPI_ISL_17658742                                                                                                                                                                                                                                                                                                                                                                                                                                                                                                                                                                                                                                                                                                                                                                                                                                                                                                                                                                                                                                                                                                                                                                                                                                                                                                                                                                                                                                                                                                                                                                                                                                                                                                                                                                                                                                                                                                                                                                                                                                                                                                                                                                                                                                                                                                                                                                                                                                                                                                                                                                                                                                                                                                                                                                                                                                                                                                                                                                                                                                                                                                                                                                                                                                                                                                                                                                                                                                                                                                                                                                                                                                                                                                                                                                                                                                                                                                                                                                                                                                                                                                                                                                                                                                                                                                                                                                                                                                                                                                                                                                                                                                                                                                                                                                                                                                                                                                                                                                                                                                                                                                                                                                                                                                                                                                                                                                                                                                                                                                                                                                                                                                                                                                                                                                                                                                                                                                                                                                                                                                                                                                                                                                                                                                                                                                                                                                                                                                                                                                                                                                                                                                                                                                                                                                                                                                                                                                                                                                                                                                                                                                                                                                                                                                                                                                                                                                                                                                                                                                                                                                                                                                                                                                                                                                                                                                                                                                                                                                                                                                                                                                                                                                                                                                                                                                                                                                                                                                                                                                                                                                                                                                                                                                                                                                                                                                                                                                                                                                                                                                                                                                                                                                                                                                                                                                                                                                                                                                                                                                                                                                                                                                                                                                                                                                                                                                                                                                                                                                                                                                                                                                                                                                                                                                                                                                                                                                                                                                                                                                                                                                                                                                                                                                                                                                                                                                                                                                                                                                                                                                                                                                                                                                                           | National Institutes of Health, National Center for Biotechnology Information                             | National Institutes of Health, National Center for Biotechnology Information                                         | Osatomi,K. and Sumiyoshi,H.                                                                                                                                                                                                                                                                                       |                                                                                                           |  |
| EPI_ISL_17658743                                                                                                                                                                                                                                                                                                                                                                                                                                                                                                                                                                                                                                                                                                                                                                                                                                                                                                                                                                                                                                                                                                                                                                                                                                                                                                                                                                                                                                                                                                                                                                                                                                                                                                                                                                                                                                                                                                                                                                                                                                                                                                                                                                                                                                                                                                                                                                                                                                                                                                                                                                                                                                                                                                                                                                                                                                                                                                                                                                                                                                                                                                                                                                                                                                                                                                                                                                                                                                                                                                                                                                                                                                                                                                                                                                                                                                                                                                                                                                                                                                                                                                                                                                                                                                                                                                                                                                                                                                                                                                                                                                                                                                                                                                                                                                                                                                                                                                                                                                                                                                                                                                                                                                                                                                                                                                                                                                                                                                                                                                                                                                                                                                                                                                                                                                                                                                                                                                                                                                                                                                                                                                                                                                                                                                                                                                                                                                                                                                                                                                                                                                                                                                                                                                                                                                                                                                                                                                                                                                                                                                                                                                                                                                                                                                                                                                                                                                                                                                                                                                                                                                                                                                                                                                                                                                                                                                                                                                                                                                                                                                                                                                                                                                                                                                                                                                                                                                                                                                                                                                                                                                                                                                                                                                                                                                                                                                                                                                                                                                                                                                                                                                                                                                                                                                                                                                                                                                                                                                                                                                                                                                                                                                                                                                                                                                                                                                                                                                                                                                                                                                                                                                                                                                                                                                                                                                                                                                                                                                                                                                                                                                                                                                                                                                                                                                                                                                                                                                                                                                                                                                                                                                                                                                                           | National Institutes of Health, National Center for Biotechnology Information                             | National Institutes of Health, National Center for Biotechnology Information                                         | Durbin,A.P., Karron,R.A., Sun,W., Vaughn,D.W., Reynolds,M.J., Perreault,J.R., Thumar,B., Men,R., Lai,C.J., Elkins,W.R., Chanock,R.M., Murphy,B.R. and Whitehead,S.S.                                                                                                                                              |                                                                                                           |  |
| EPI_ISL_17658986                                                                                                                                                                                                                                                                                                                                                                                                                                                                                                                                                                                                                                                                                                                                                                                                                                                                                                                                                                                                                                                                                                                                                                                                                                                                                                                                                                                                                                                                                                                                                                                                                                                                                                                                                                                                                                                                                                                                                                                                                                                                                                                                                                                                                                                                                                                                                                                                                                                                                                                                                                                                                                                                                                                                                                                                                                                                                                                                                                                                                                                                                                                                                                                                                                                                                                                                                                                                                                                                                                                                                                                                                                                                                                                                                                                                                                                                                                                                                                                                                                                                                                                                                                                                                                                                                                                                                                                                                                                                                                                                                                                                                                                                                                                                                                                                                                                                                                                                                                                                                                                                                                                                                                                                                                                                                                                                                                                                                                                                                                                                                                                                                                                                                                                                                                                                                                                                                                                                                                                                                                                                                                                                                                                                                                                                                                                                                                                                                                                                                                                                                                                                                                                                                                                                                                                                                                                                                                                                                                                                                                                                                                                                                                                                                                                                                                                                                                                                                                                                                                                                                                                                                                                                                                                                                                                                                                                                                                                                                                                                                                                                                                                                                                                                                                                                                                                                                                                                                                                                                                                                                                                                                                                                                                                                                                                                                                                                                                                                                                                                                                                                                                                                                                                                                                                                                                                                                                                                                                                                                                                                                                                                                                                                                                                                                                                                                                                                                                                                                                                                                                                                                                                                                                                                                                                                                                                                                                                                                                                                                                                                                                                                                                                                                                                                                                                                                                                                                                                                                                                                                                                                                                                                                                                           | Virology Unit, Institut Pasteur de Dakar                                                                 | Virology Unit, Institut Pasteur de Dakar                                                                             | Lagare,A., Faye,M., Fintan,G., Fall,G., Ousmane,H., Ibrahim,E.T., Diagne,M.M., Amadou,S., Sankhe,S., Ibrahim,L., Seini,H., Faye,O. and Jambou,R.                                                                                                                                                                  |                                                                                                           |  |
| EPI_ISL_17658987                                                                                                                                                                                                                                                                                                                                                                                                                                                                                                                                                                                                                                                                                                                                                                                                                                                                                                                                                                                                                                                                                                                                                                                                                                                                                                                                                                                                                                                                                                                                                                                                                                                                                                                                                                                                                                                                                                                                                                                                                                                                                                                                                                                                                                                                                                                                                                                                                                                                                                                                                                                                                                                                                                                                                                                                                                                                                                                                                                                                                                                                                                                                                                                                                                                                                                                                                                                                                                                                                                                                                                                                                                                                                                                                                                                                                                                                                                                                                                                                                                                                                                                                                                                                                                                                                                                                                                                                                                                                                                                                                                                                                                                                                                                                                                                                                                                                                                                                                                                                                                                                                                                                                                                                                                                                                                                                                                                                                                                                                                                                                                                                                                                                                                                                                                                                                                                                                                                                                                                                                                                                                                                                                                                                                                                                                                                                                                                                                                                                                                                                                                                                                                                                                                                                                                                                                                                                                                                                                                                                                                                                                                                                                                                                                                                                                                                                                                                                                                                                                                                                                                                                                                                                                                                                                                                                                                                                                                                                                                                                                                                                                                                                                                                                                                                                                                                                                                                                                                                                                                                                                                                                                                                                                                                                                                                                                                                                                                                                                                                                                                                                                                                                                                                                                                                                                                                                                                                                                                                                                                                                                                                                                                                                                                                                                                                                                                                                                                                                                                                                                                                                                                                                                                                                                                                                                                                                                                                                                                                                                                                                                                                                                                                                                                                                                                                                                                                                                                                                                                                                                                                                                                                                                                                           | Department of Microbiology, Calcutta School of Tropical Medicine                                         | Department of Microbiology, Calcutta School of Tropical Medicine                                                     | Tripathi,A. and Mukherjee,S.                                                                                                                                                                                                                                                                                      |                                                                                                           |  |
| EPI_ISL_17658988                                                                                                                                                                                                                                                                                                                                                                                                                                                                                                                                                                                                                                                                                                                                                                                                                                                                                                                                                                                                                                                                                                                                                                                                                                                                                                                                                                                                                                                                                                                                                                                                                                                                                                                                                                                                                                                                                                                                                                                                                                                                                                                                                                                                                                                                                                                                                                                                                                                                                                                                                                                                                                                                                                                                                                                                                                                                                                                                                                                                                                                                                                                                                                                                                                                                                                                                                                                                                                                                                                                                                                                                                                                                                                                                                                                                                                                                                                                                                                                                                                                                                                                                                                                                                                                                                                                                                                                                                                                                                                                                                                                                                                                                                                                                                                                                                                                                                                                                                                                                                                                                                                                                                                                                                                                                                                                                                                                                                                                                                                                                                                                                                                                                                                                                                                                                                                                                                                                                                                                                                                                                                                                                                                                                                                                                                                                                                                                                                                                                                                                                                                                                                                                                                                                                                                                                                                                                                                                                                                                                                                                                                                                                                                                                                                                                                                                                                                                                                                                                                                                                                                                                                                                                                                                                                                                                                                                                                                                                                                                                                                                                                                                                                                                                                                                                                                                                                                                                                                                                                                                                                                                                                                                                                                                                                                                                                                                                                                                                                                                                                                                                                                                                                                                                                                                                                                                                                                                                                                                                                                                                                                                                                                                                                                                                                                                                                                                                                                                                                                                                                                                                                                                                                                                                                                                                                                                                                                                                                                                                                                                                                                                                                                                                                                                                                                                                                                                                                                                                                                                                                                                                                                                                                                                           | Virology Unit, Institut Pasteur de Dakar                                                                 | Virology Unit, Institut Pasteur de Dakar                                                                             | Dieng,I.                                                                                                                                                                                                                                                                                                          |                                                                                                           |  |
| EPI_ISL_17658989                                                                                                                                                                                                                                                                                                                                                                                                                                                                                                                                                                                                                                                                                                                                                                                                                                                                                                                                                                                                                                                                                                                                                                                                                                                                                                                                                                                                                                                                                                                                                                                                                                                                                                                                                                                                                                                                                                                                                                                                                                                                                                                                                                                                                                                                                                                                                                                                                                                                                                                                                                                                                                                                                                                                                                                                                                                                                                                                                                                                                                                                                                                                                                                                                                                                                                                                                                                                                                                                                                                                                                                                                                                                                                                                                                                                                                                                                                                                                                                                                                                                                                                                                                                                                                                                                                                                                                                                                                                                                                                                                                                                                                                                                                                                                                                                                                                                                                                                                                                                                                                                                                                                                                                                                                                                                                                                                                                                                                                                                                                                                                                                                                                                                                                                                                                                                                                                                                                                                                                                                                                                                                                                                                                                                                                                                                                                                                                                                                                                                                                                                                                                                                                                                                                                                                                                                                                                                                                                                                                                                                                                                                                                                                                                                                                                                                                                                                                                                                                                                                                                                                                                                                                                                                                                                                                                                                                                                                                                                                                                                                                                                                                                                                                                                                                                                                                                                                                                                                                                                                                                                                                                                                                                                                                                                                                                                                                                                                                                                                                                                                                                                                                                                                                                                                                                                                                                                                                                                                                                                                                                                                                                                                                                                                                                                                                                                                                                                                                                                                                                                                                                                                                                                                                                                                                                                                                                                                                                                                                                                                                                                                                                                                                                                                                                                                                                                                                                                                                                                                                                                                                                                                                                                                                           | Department of Microbiology, King George's Medical University                                             | Department of Microbiology, King George's Medical University                                                         | Mallikarjun,K., Santhosh,K.S. and Puneeth,T.G.                                                                                                                                                                                                                                                                    |                                                                                                           |  |
| EPI_ISL_17673145, EPI_ISL_17673146, EPI_ISL_17673147, EPI_ISL_17673148, EPI_ISL_17673149, EPI_ISL_17673150                                                                                                                                                                                                                                                                                                                                                                                                                                                                                                                                                                                                                                                                                                                                                                                                                                                                                                                                                                                                                                                                                                                                                                                                                                                                                                                                                                                                                                                                                                                                                                                                                                                                                                                                                                                                                                                                                                                                                                                                                                                                                                                                                                                                                                                                                                                                                                                                                                                                                                                                                                                                                                                                                                                                                                                                                                                                                                                                                                                                                                                                                                                                                                                                                                                                                                                                                                                                                                                                                                                                                                                                                                                                                                                                                                                                                                                                                                                                                                                                                                                                                                                                                                                                                                                                                                                                                                                                                                                                                                                                                                                                                                                                                                                                                                                                                                                                                                                                                                                                                                                                                                                                                                                                                                                                                                                                                                                                                                                                                                                                                                                                                                                                                                                                                                                                                                                                                                                                                                                                                                                                                                                                                                                                                                                                                                                                                                                                                                                                                                                                                                                                                                                                                                                                                                                                                                                                                                                                                                                                                                                                                                                                                                                                                                                                                                                                                                                                                                                                                                                                                                                                                                                                                                                                                                                                                                                                                                                                                                                                                                                                                                                                                                                                                                                                                                                                                                                                                                                                                                                                                                                                                                                                                                                                                                                                                                                                                                                                                                                                                                                                                                                                                                                                                                                                                                                                                                                                                                                                                                                                                                                                                                                                                                                                                                                                                                                                                                                                                                                                                                                                                                                                                                                                                                                                                                                                                                                                                                                                                                                                                                                                                                                                                                                                                                                                                                                                                                                                                                                                                                                                                                 | Instituto Adolfo Lutz - Strategic Laboratory                                                             | Instituto Adolfo Lutz - Strategic Laboratory                                                                         | Claudio Tavares Sacchi, Karoline Rodrigues Campos, Marlon Benedito Nascimento Santos, Juliana Silva Nogueira                                                                                                                                                                                                      |                                                                                                           |  |
| EPI_ISL_17673494                                                                                                                                                                                                                                                                                                                                                                                                                                                                                                                                                                                                                                                                                                                                                                                                                                                                                                                                                                                                                                                                                                                                                                                                                                                                                                                                                                                                                                                                                                                                                                                                                                                                                                                                                                                                                                                                                                                                                                                                                                                                                                                                                                                                                                                                                                                                                                                                                                                                                                                                                                                                                                                                                                                                                                                                                                                                                                                                                                                                                                                                                                                                                                                                                                                                                                                                                                                                                                                                                                                                                                                                                                                                                                                                                                                                                                                                                                                                                                                                                                                                                                                                                                                                                                                                                                                                                                                                                                                                                                                                                                                                                                                                                                                                                                                                                                                                                                                                                                                                                                                                                                                                                                                                                                                                                                                                                                                                                                                                                                                                                                                                                                                                                                                                                                                                                                                                                                                                                                                                                                                                                                                                                                                                                                                                                                                                                                                                                                                                                                                                                                                                                                                                                                                                                                                                                                                                                                                                                                                                                                                                                                                                                                                                                                                                                                                                                                                                                                                                                                                                                                                                                                                                                                                                                                                                                                                                                                                                                                                                                                                                                                                                                                                                                                                                                                                                                                                                                                                                                                                                                                                                                                                                                                                                                                                                                                                                                                                                                                                                                                                                                                                                                                                                                                                                                                                                                                                                                                                                                                                                                                                                                                                                                                                                                                                                                                                                                                                                                                                                                                                                                                                                                                                                                                                                                                                                                                                                                                                                                                                                                                                                                                                                                                                                                                                                                                                                                                                                                                                                                                                                                                                                                                                           | Vector-borne Diseases Laboratory, Instituto Adolfo Lutz                                                  | Vector-borne Diseases Laboratory, Instituto Adolfo Lutz                                                              | Cunha,M.S., de Moura Coletti,T., Guerra,I.M., Ponce,C.C., Fernandes,N.C.C.A., Resio,R.A., Claro,I.M., Salles,F., Lima Neto,D.F. and Sabino,E.                                                                                                                                                                     |                                                                                                           |  |
| EPI_ISL_17673495                                                                                                                                                                                                                                                                                                                                                                                                                                                                                                                                                                                                                                                                                                                                                                                                                                                                                                                                                                                                                                                                                                                                                                                                                                                                                                                                                                                                                                                                                                                                                                                                                                                                                                                                                                                                                                                                                                                                                                                                                                                                                                                                                                                                                                                                                                                                                                                                                                                                                                                                                                                                                                                                                                                                                                                                                                                                                                                                                                                                                                                                                                                                                                                                                                                                                                                                                                                                                                                                                                                                                                                                                                                                                                                                                                                                                                                                                                                                                                                                                                                                                                                                                                                                                                                                                                                                                                                                                                                                                                                                                                                                                                                                                                                                                                                                                                                                                                                                                                                                                                                                                                                                                                                                                                                                                                                                                                                                                                                                                                                                                                                                                                                                                                                                                                                                                                                                                                                                                                                                                                                                                                                                                                                                                                                                                                                                                                                                                                                                                                                                                                                                                                                                                                                                                                                                                                                                                                                                                                                                                                                                                                                                                                                                                                                                                                                                                                                                                                                                                                                                                                                                                                                                                                                                                                                                                                                                                                                                                                                                                                                                                                                                                                                                                                                                                                                                                                                                                                                                                                                                                                                                                                                                                                                                                                                                                                                                                                                                                                                                                                                                                                                                                                                                                                                                                                                                                                                                                                                                                                                                                                                                                                                                                                                                                                                                                                                                                                                                                                                                                                                                                                                                                                                                                                                                                                                                                                                                                                                                                                                                                                                                                                                                                                                                                                                                                                                                                                                                                                                                                                                                                                                                                                                           | Instituto Adolfo Lutz - Strategic Laboratory                                                             | Instituto Adolfo Lutz - Strategic Laboratory                                                                         | Sacchi,C.T., Campos,K.R., Santos,M.B., Reis,A.D., Nogueira,J.S. and Maeda,A.Y.                                                                                                                                                                                                                                    |                                                                                                           |  |
| EPI_ISL_17673496, EPI_ISL_17673497, EPI_ISL_17673498, EPI_ISL_17673499, EPI_ISL_17673500, EPI_ISL_17673501, EPI_ISL_17673502, EPI_ISL_17673503, EPI_ISL_17673504, EPI_ISL_17673505, EPI_ISL_17673506, EPI_IS                                                                                                                                                                                                                                                                                                                                                                                                                                                                                                                                                                                                                                                                                                                                                                                                                                                                                                                                                                                                                                                                                                                                                                                                                                                                                                                                                                                                                                                                                                                                                                                                                                                                                                                                                                                                                                                                                                                                                                                                                                                                                                                                                                                                                                                                                                                                                                                                                                                                                                                                                                                                                                                                                                                                                                                                                                                                                                                                                                                                                                                                                                                                                                                                                                                                                                                                                                                                                                                                                                                                                                                                                                                                                                                                                                                                                                                                                                                                                                                                                                                                                                                                                                                                                                                                                                                                                                                                                                                                                                                                                                                                                                                                                                                                                                                                                                                                                                                                                                                                                                                                                                                                                                                                                                                                                                                                                                                                                                                                                                                                                                                                                                                                                                                                                                                                                                                                                                                                                                                                                                                                                                                                                                                                                                                                                                                                                                                                                                                                                                                                                                                                                                                                                                                                                                                                                                                                                                                                                                                                                                                                                                                                                                                                                                                                                                                                                                                                                                                                                                                                                                                                                                                                                                                                                                                                                                                                                                                                                                                                                                                                                                                                                                                                                                                                                                                                                                                                                                                                                                                                                                                                                                                                                                                                                                                                                                                                                                                                                                                                                                                                                                                                                                                                                                                                                                                                                                                                                                                                                                                                                                                                                                                                                                                                                                                                                                                                                                                                                                                                                                                                                                                                                                                                                                                                                                                                                                                                                                                                                                                                                                                                                                                                                                                                                                                                                                                                                                                                                                                               |                                                                                                          |                                                                                                                      |                                                                                                                                                                                                                                                                                                                   |                                                                                                           |  |







| Cysneiros (LACEN-GO)                                                                                                                                                                                                                                                                                                                                                                                                                                             |                                                                                                          | Cysneiros (LACEN-GO)                                                                                     |  |                                                                                                                                                                                  |
|------------------------------------------------------------------------------------------------------------------------------------------------------------------------------------------------------------------------------------------------------------------------------------------------------------------------------------------------------------------------------------------------------------------------------------------------------------------|----------------------------------------------------------------------------------------------------------|----------------------------------------------------------------------------------------------------------|--|----------------------------------------------------------------------------------------------------------------------------------------------------------------------------------|
| EPI_ISL_17884850, EPI_ISL_17884851, EPI_ISL_17884852, EPI_ISL_17884853, EPI_ISL_17884854, EPI_ISL_17884855, EPI_ISL_17884856, EPI_ISL_17884857, EPI_ISL_17884858, EPI_ISL_17884859, EPI_ISL_17884860, EPI_ISL_17884861, EPI_ISL_17884862, EPI_ISL_17884863, EPI_ISL_17884864, EPI_ISL_17884865, EPI_ISL_17884866, EPI_ISL_17884867, EPI_ISL_17884868, EPI_ISL_17884869, EPI_ISL_17884870, EPI_ISL_17884871                                                       |                                                                                                          |                                                                                                          |  |                                                                                                                                                                                  |
| see above                                                                                                                                                                                                                                                                                                                                                                                                                                                        | Coordenacao Geral da Laboratorio em Saude Publica                                                        | Coordenacao Geral da Laboratorio em Saude Publica                                                        |  | Ribeiro,G., Parise,D., Paiva,A., Franz,H., Junior,W. and Arcanjo,A.R.                                                                                                            |
| EPI_ISL_17884872                                                                                                                                                                                                                                                                                                                                                                                                                                                 | Virus Laboratory, Indian Council of Medical Research, National Institute of Cholera and Enteric Diseases | Virus Laboratory, Indian Council of Medical Research, National Institute of Cholera and Enteric Diseases |  | Baskey,U., Verma,P., Ghosh,A. and Sadhukhan,P.C.                                                                                                                                 |
| EPI_ISL_17959701, EPI_ISL_17959702, EPI_ISL_17959703, EPI_ISL_17959704, EPI_ISL_17959705, EPI_ISL_17959706, EPI_ISL_17959707, EPI_ISL_17959708, EPI_ISL_17959709, EPI_ISL_17959710, EPI_ISL_17959711, EPI_ISL_17959712, EPI_ISL_17959713, EPI_ISL_17959714, EPI_ISL_17959715, EPI_ISL_17959716, EPI_ISL_17959718, EPI_ISL_17959719, EPI_ISL_17959720, EPI_ISL_17959722, EPI_ISL_17959723, EPI_ISL_17959724, EPI_ISL_17959725, EPI_ISL_17959726                   |                                                                                                          |                                                                                                          |  |                                                                                                                                                                                  |
| see above                                                                                                                                                                                                                                                                                                                                                                                                                                                        | Institute of Microbiology, Universidad San Francisco de Quito                                            | Institute of Microbiology, Universidad San Francisco de Quito                                            |  | Sully Márquez, Gwenyth Lee, Bernardo Gutiérrez, Joseph Eisenberg, Gabriel Trueba, Josefina Coloma                                                                                |
| EPI_ISL_17975657, EPI_ISL_17975658, EPI_ISL_17975659, EPI_ISL_17975660, EPI_ISL_17975661, EPI_ISL_17975662, EPI_ISL_17975663, EPI_ISL_17975664, EPI_ISL_17975665, EPI_ISL_17975666, EPI_ISL_17975667, EPI_ISL_17975668, EPI_ISL_17975669, EPI_ISL_17975670, EPI_ISL_17975671, EPI_ISL_17975672, EPI_ISL_17975673, EPI_ISL_17975674, EPI_ISL_17975675, EPI_ISL_17975676, EPI_ISL_17975677, EPI_ISL_17975678, EPI_ISL_17975679, EPI_ISL_17975680, EPI_ISL_17975681 |                                                                                                          |                                                                                                          |  |                                                                                                                                                                                  |
| see above                                                                                                                                                                                                                                                                                                                                                                                                                                                        | Gandhi Medical College                                                                                   | Gandhi Medical College                                                                                   |  | Agarwal,A., Ganvir,R., Kale,D., Chaurasia,D. and Kapoor,G.                                                                                                                       |
| EPI_ISL_17975682, EPI_ISL_17975683, EPI_ISL_17975684, EPI_ISL_17975685, EPI_ISL_17975686, EPI_ISL_17975687, EPI_ISL_17975688, EPI_ISL_17975689, EPI_ISL_17975690, EPI_ISL_17975691, EPI_ISL_17975692, EPI_ISL_17975693, EPI_ISL_17975694, EPI_ISL_17975695, EPI_ISL_17975696, EPI_ISL_17975697, EPI_ISL_17975698, EPI_ISL_17975699                                                                                                                               |                                                                                                          |                                                                                                          |  | Mengeshu,M., Tayachew,A., Tsega,D., Hailu,D., Abeje,D., Seyoum,T., Adnew,B., Konde,A., Biru,M., Agunie,A., Asrat,Y., Wossen,M., Gelanew,T., Piantadosi,A., Mihret,A. and Mulu,A. |
| see above                                                                                                                                                                                                                                                                                                                                                                                                                                                        | Armauer Hansen Research Institute                                                                        | Armauer Hansen Research Institute                                                                        |  |                                                                                                                                                                                  |
| EPI_ISL_17976304, EPI_ISL_17977444                                                                                                                                                                                                                                                                                                                                                                                                                               | Instituto de Investigaciones Biológicas del Tropic, Universidad de Córdoba                               | Instituto de Investigaciones Biológicas del Tropic, Universidad de Córdoba                               |  | Ricardo Rivero, Daniela Paternina, Vaneza Tique, Salim Mattar                                                                                                                    |
| EPI_ISL_17980694, EPI_ISL_17980695, EPI_ISL_17980696, EPI_ISL_17980697, EPI_ISL_17980698, EPI_ISL_17980699, EPI_ISL_17980700, EPI_ISL_17980701, EPI_ISL_17980702, EPI_ISL_17980703, EPI_ISL_17980704, EPI_ISL_17980705                                                                                                                                                                                                                                           |                                                                                                          |                                                                                                          |  |                                                                                                                                                                                  |
| see above                                                                                                                                                                                                                                                                                                                                                                                                                                                        | Department of Microbiology                                                                               | Department of Microbiology                                                                               |  | Okada,W., Kasuya,F., Harada,S., Kumagai,R., Amano,A., Hasegawa,M., Miyake,H., Nagashima,M. and Sadamasu,K.                                                                       |
| EPI_ISL_17980809, EPI_ISL_17980810                                                                                                                                                                                                                                                                                                                                                                                                                               | Hospital Maternidade Sao Jose (Guaraciaba Do Norte)                                                      | Laboratório Central de Saúde Pública do Ceará                                                            |  | Tayna da Silva Fiuzza, Vânia Angélica Feitosa Viana, Shirlene Telmos Silva de Lima                                                                                               |
| EPI_ISL_17980811                                                                                                                                                                                                                                                                                                                                                                                                                                                 | Laboratorio De Patologia Clínica De Morada Nova                                                          | Laboratório Central de Saúde Pública do Ceará                                                            |  | Tayna da Silva Fiuzza, Vânia Angélica Feitosa Viana, Shirlene Telmos Silva de Lima                                                                                               |
| EPI_ISL_17980812                                                                                                                                                                                                                                                                                                                                                                                                                                                 | Hospital Municipal Jaime Osterno (Marco)                                                                 | Laboratório Central de Saúde Pública do Ceará                                                            |  | Tayna da Silva Fiuzza, Vânia Angélica Feitosa Viana, Shirlene Telmos Silva de Lima                                                                                               |
| EPI_ISL_17980813                                                                                                                                                                                                                                                                                                                                                                                                                                                 | Centro De Saude De Bela Cruzfns(Bela Cruz)                                                               | Laboratório Central de Saúde Pública do Ceará                                                            |  | Tayna da Silva Fiuzza, Vânia Angélica Feitosa Viana, Shirlene Telmos Silva de Lima                                                                                               |
| EPI_ISL_17980814                                                                                                                                                                                                                                                                                                                                                                                                                                                 | Hospital Municipal De Jaguaribe                                                                          | Laboratório Central de Saúde Pública do Ceará                                                            |  | Tayna da Silva Fiuzza, Vânia Angélica Feitosa Viana, Shirlene Telmos Silva de Lima                                                                                               |
| EPI_ISL_17980815, EPI_ISL_17980816, EPI_ISL_17980817, EPI_ISL_17980818, EPI_ISL_17980819, EPI_ISL_17980820, EPI_ISL_17980821, EPI_ISL_17980822, EPI_ISL_17980823, EPI_ISL_17980824, EPI_ISL_17980825, EPI_ISL_17980826, EPI_ISL_17980827                                                                                                                                                                                                                         |                                                                                                          |                                                                                                          |  |                                                                                                                                                                                  |
| see above                                                                                                                                                                                                                                                                                                                                                                                                                                                        | Centro De Saude De Bela Cruzfns(Bela Cruz)                                                               | Laboratório Central de Saúde Pública do Ceará                                                            |  | Tayna da Silva Fiuzza, Vânia Angélica Feitosa Viana, Shirlene Telmos Silva de Lima                                                                                               |
| EPI_ISL_17980828                                                                                                                                                                                                                                                                                                                                                                                                                                                 | Lab De Analises Clinicas De Cruz                                                                         | Laboratório Central de Saúde Pública do Ceará                                                            |  | Tayna da Silva Fiuzza, Vânia Angélica Feitosa Viana, Shirlene Telmos Silva de Lima                                                                                               |
| EPI_ISL_17980829                                                                                                                                                                                                                                                                                                                                                                                                                                                 | Hosp Munic Dr Deoclecio Lima Verde (Limoeiro)                                                            | Laboratório Central de Saúde Pública do Ceará                                                            |  | Tayna da Silva Fiuzza, Vânia Angélica Feitosa Viana, Shirlene Telmos Silva de Lima                                                                                               |
| EPI_ISL_17980830                                                                                                                                                                                                                                                                                                                                                                                                                                                 | Centro De Saude De Bela Cruzfns(Bela Cruz)                                                               | Laboratório Central de Saúde Pública do Ceará                                                            |  | Tayna da Silva Fiuzza, Vânia Angélica Feitosa Viana, Shirlene Telmos Silva de Lima                                                                                               |
| EPI_ISL_17980831, EPI_ISL_17980832                                                                                                                                                                                                                                                                                                                                                                                                                               | Hospital Municipal De Jaguaribe                                                                          | Laboratório Central de Saúde Pública do Ceará                                                            |  | Tayna da Silva Fiuzza, Vânia Angélica Feitosa Viana, Shirlene Telmos Silva de Lima                                                                                               |
| EPI_ISL_17980833                                                                                                                                                                                                                                                                                                                                                                                                                                                 | Centro De Saude De Bela Cruzfns(Bela Cruz)                                                               | Laboratório Central de Saúde Pública do Ceará                                                            |  | Tayna da Silva Fiuzza, Vânia Angélica Feitosa Viana, Shirlene Telmos Silva de Lima                                                                                               |
| EPI_ISL_17980834, EPI_ISL_17980835, EPI_ISL_17980836, EPI_ISL_17980837                                                                                                                                                                                                                                                                                                                                                                                           | Hospital Municipal De Jaguaribe                                                                          | Laboratório Central de Saúde Pública do Ceará                                                            |  | Tayna da Silva Fiuzza, Vânia Angélica Feitosa Viana, Shirlene Telmos Silva de Lima                                                                                               |
| EPI_ISL_17980838, EPI_ISL_17980839, EPI_ISL_17980840, EPI_ISL_17980841, EPI_ISL_17980842, EPI_ISL_17980843, EPI_ISL_17980844, EPI_ISL_17980845, EPI_ISL_17980846, EPI_ISL_17980847, EPI_ISL_17980848                                                                                                                                                                                                                                                             |                                                                                                          |                                                                                                          |  |                                                                                                                                                                                  |
| see above                                                                                                                                                                                                                                                                                                                                                                                                                                                        | Centro De Saude De Bela Cruzfns(Bela Cruz)                                                               | Laboratório Central de Saúde Pública do Ceará                                                            |  | Tayna da Silva Fiuzza, Vânia Angélica Feitosa Viana, Shirlene Telmos Silva de Lima                                                                                               |
| EPI_ISL_17980849                                                                                                                                                                                                                                                                                                                                                                                                                                                 | Hospital Infantil Albert Sabin (Fortaleza)                                                               | Laboratório Central de Saúde Pública do Ceará                                                            |  | Tayna da Silva Fiuzza, Vânia Angélica Feitosa Viana, Shirlene Telmos Silva de Lima                                                                                               |
| EPI_ISL_17983067                                                                                                                                                                                                                                                                                                                                                                                                                                                 | LACEN de Tocantins                                                                                       | Instituto Adolfo Lutz - Strategic Laboratory                                                             |  | Claudio Tavares Sacchi, Karoline Rodrigues Campos, Marlon Benedito Nascimento Santos, Franciano Dias Pereira Cardoso                                                             |
| EPI_ISL_17983068, EPI_ISL_17983069, EPI_ISL_17983070, EPI_ISL_17983071                                                                                                                                                                                                                                                                                                                                                                                           | LACEN de Sergipe                                                                                         | Instituto Adolfo Lutz - Strategic Laboratory                                                             |  | Claudio Tavares Sacchi, Karoline Rodrigues Campos, Marlon Benedito Nascimento Santos, Gabriela Vasconcelos Brito Bezerra                                                         |
| EPI_ISL_17983072, EPI_ISL_17983073, EPI_ISL_17983074, EPI_ISL_17983075, EPI_ISL_17983076, EPI_ISL_17983077, EPI_ISL_17983078, EPI_ISL_17983079, EPI_ISL_17983080, EPI_ISL_17983081, EPI_ISL_17983082, EPI_ISL_17983083, EPI_ISL_17983084, EPI_ISL_17983085, EPI_ISL_17983086, EPI_ISL_17983087                                                                                                                                                                   |                                                                                                          |                                                                                                          |  |                                                                                                                                                                                  |
| see above                                                                                                                                                                                                                                                                                                                                                                                                                                                        | Instituto Adolfo Lutz                                                                                    | Instituto Adolfo Lutz - Strategic Laboratory                                                             |  | Claudio Tavares Sacchi, Karoline Rodrigues Campos, Marlon Benedito Nascimento Santos, Juliana Silva Nogueira                                                                     |
| EPI_ISL_17983088, EPI_ISL_17983089, EPI_ISL_17983090, EPI_ISL_17983091                                                                                                                                                                                                                                                                                                                                                                                           | LACEN de Sergipe                                                                                         | Instituto Adolfo Lutz - Strategic Laboratory                                                             |  | Claudio Tavares Sacchi, Karoline Rodrigues Campos, Marlon Benedito Nascimento Santos, Gabriela Vasconcelos Brito Bezerra                                                         |
| EPI_ISL_17983092, EPI_ISL_17983093, EPI_ISL_17983094                                                                                                                                                                                                                                                                                                                                                                                                             | LACEN de Tocantins                                                                                       | Instituto Adolfo Lutz - Strategic Laboratory                                                             |  | Claudio Tavares Sacchi, Karoline Rodrigues Campos, Marlon Benedito Nascimento Santos, Franciano Dias Pereira Cardoso                                                             |
| EPI_ISL_17983095                                                                                                                                                                                                                                                                                                                                                                                                                                                 | LACEN de Tocantins                                                                                       | Instituto Adolfo Lutz - Strategic Laboratory                                                             |  | Claudio Tavares Sacchi, Karoline Rodrigues Campos, Marlon Benedito Nascimento Santos, Gabriela Vasconcelos Brito Bezerra                                                         |
| EPI_ISL_18001716                                                                                                                                                                                                                                                                                                                                                                                                                                                 | Armauer Hansen Research Institute                                                                        | Armauer Hansen Research Institute                                                                        |  | Mengeshu,M., Tayachew,A., Tsega,D., Hailu,D., Abeje,D., Seyoum,T., Adnew,B., Konde,A., Biru,M., Agunie,A., Asrat,Y., Wossen,M., Gelanew,T., Piantadosi,A., Mihret,A. and Mulu,A. |
| EPI_ISL_18001717, EPI_ISL_18001718, EPI_ISL_18001719, EPI_ISL_18001720, EPI_ISL_18001721, EPI_ISL_18001722, EPI_ISL_18001723, EPI_ISL_18001724, EPI_ISL_18001725, EPI_ISL_18001726, EPI_ISL_18001727, EPI_ISL_18001728                                                                                                                                                                                                                                           |                                                                                                          |                                                                                                          |  |                                                                                                                                                                                  |
| see above                                                                                                                                                                                                                                                                                                                                                                                                                                                        | Department of Microbiology                                                                               | Department of Microbiology                                                                               |  | Okada,W., Kasuya,F., Harada,S., Kumagai,R., Amano,A., Hasegawa,M., Miyake,H., Nagashima,M. and Sadamasu,K.                                                                       |
| EPI_ISL_18001729, EPI_ISL_18001730, EPI_ISL_18001731, EPI_ISL_18001732, EPI_ISL_18001733, EPI_ISL_18001734, EPI_ISL_18001735, EPI_ISL_18001736, EPI_ISL_18001737, EPI_ISL_18001738, EPI_ISL_18001739, EPI_ISL_18001740, EPI_ISL_18001741, EPI_ISL_18001742, EPI_ISL_18001743, EPI_ISL_18001744, EPI_ISL_18001745                                                                                                                                                 |                                                                                                          |                                                                                                          |  |                                                                                                                                                                                  |
| see above                                                                                                                                                                                                                                                                                                                                                                                                                                                        | Gandhi Medical College                                                                                   | Gandhi Medical College                                                                                   |  | Agarwal,A., Ganvir,R., Kale,D., Chaurasia,D. and Kapoor,G.                                                                                                                       |
| EPI_ISL_18007204, EPI_ISL_18007205, EPI_ISL_18007206, EPI_ISL_18007207, EPI_ISL_18007208, EPI_ISL_18007209, EPI_ISL_18007210, EPI_ISL_18007211, EPI_ISL_18007212                                                                                                                                                                                                                                                                                                 |                                                                                                          |                                                                                                          |  |                                                                                                                                                                                  |
| EPI_ISL_18007213                                                                                                                                                                                                                                                                                                                                                                                                                                                 | Centro Nacional de Enfermedades Tropicales                                                               | Centro Nacional de Enfermedades Tropicales                                                               |  | Roca,Y., Baronti,C., Revollo,R.J., Cook,S., Loayza,R., Ninove,L., Fernandez,R.T., Flores,J.V., Herve,J.P. and de Lamballerie,X.                                                  |
|                                                                                                                                                                                                                                                                                                                                                                                                                                                                  | Department of Virology and Immunity, Guangzhou Center for Disease Control and Prevention                 | Department of Virology and Immunity, Guangzhou Center for Disease Control and Prevention                 |  | Su,W., Lu,W. and Cao,Y.                                                                                                                                                          |
| EPI_ISL_18009962, EPI_ISL_18009963                                                                                                                                                                                                                                                                                                                                                                                                                               | LACEN-AL                                                                                                 | Laboratório Central de Saúde Pública do Ceará                                                            |  | Tayna da Silva Fiuzza, Vânia Angélica Feitosa Viana, Shirlene Telmos Silva de Lima                                                                                               |
| EPI_ISL_18009964                                                                                                                                                                                                                                                                                                                                                                                                                                                 | LACEN-MA                                                                                                 | Laboratório Central de Saúde Pública do Ceará                                                            |  | Tayna da Silva Fiuzza, Vânia Angélica Feitosa Viana, Shirlene Telmos Silva de Lima on behalf of LACEN-MA                                                                         |
| EPI_ISL_18009965                                                                                                                                                                                                                                                                                                                                                                                                                                                 | Unidade Mista Dr Edmar Da Costa Barroso (Pacatuba)                                                       | Laboratório Central de Saúde Pública do Ceará                                                            |  | Tayna da Silva Fiuzza, Vânia Angélica Feitosa Viana, Shirlene Telmos Silva de Lima                                                                                               |
| EPI_ISL_18009966, EPI_ISL_18009967, EPI_ISL_18009968, EPI_ISL_18009969, EPI_ISL_18009970, EPI_ISL_18009971, EPI_ISL_18009972                                                                                                                                                                                                                                                                                                                                     |                                                                                                          |                                                                                                          |  |                                                                                                                                                                                  |
| EPI_ISL_18009973                                                                                                                                                                                                                                                                                                                                                                                                                                                 | Hospital Municipal De Jaguaribe                                                                          | Laboratório Central de Saúde Pública do Ceará                                                            |  | Tayna da Silva Fiuzza, Vânia Angélica Feitosa Viana, Shirlene Telmos Silva de Lima                                                                                               |
| EPI_ISL_18009974                                                                                                                                                                                                                                                                                                                                                                                                                                                 | Lab De Analises Clinicas De Cruz                                                                         | Laboratório Central de Saúde Pública do Ceará                                                            |  | Tayna da Silva Fiuzza, Vânia Angélica Feitosa Viana, Shirlene Telmos Silva de Lima                                                                                               |
| EPI_ISL_18009975                                                                                                                                                                                                                                                                                                                                                                                                                                                 | Hospital Municipal Jaime Osterno (Marco)                                                                 | Laboratório Central de Saúde Pública do Ceará                                                            |  | Tayna da Silva Fiuzza, Vânia Angélica Feitosa Viana, Shirlene Telmos Silva de Lima                                                                                               |
| EPI_ISL_18009976                                                                                                                                                                                                                                                                                                                                                                                                                                                 | Lab De Analises Clinicas De Cruz                                                                         | Laboratório Central de Saúde Pública do Ceará                                                            |  | Tayna da Silva Fiuzza, Vânia Angélica Feitosa Viana, Shirlene Telmos Silva de Lima                                                                                               |
| EPI_ISL_18009977, EPI_ISL_18009978                                                                                                                                                                                                                                                                                                                                                                                                                               | Hospital Municipal De Jaguaribe                                                                          | Laboratório Central de Saúde Pública do Ceará                                                            |  | Tayna da Silva Fiuzza, Vânia Angélica Feitosa Viana, Shirlene Telmos Silva de Lima                                                                                               |
| EPI_ISL_18009979                                                                                                                                                                                                                                                                                                                                                                                                                                                 | Hospital Da Mulher De Fortaleza                                                                          | Laboratório Central de Saúde Pública do Ceará                                                            |  | Tayna da Silva Fiuzza, Vânia Angélica Feitosa Viana, Shirlene Telmos Silva de Lima                                                                                               |
| EPI_ISL_18009980                                                                                                                                                                                                                                                                                                                                                                                                                                                 | Hospital Municipal Jaime Osterno (Marco)                                                                 | Laboratório Central de Saúde Pública do Ceará                                                            |  | Tayna da Silva Fiuzza, Vânia Angélica Feitosa Viana, Shirlene Telmos Silva de Lima                                                                                               |
| EPI_ISL_18009981, EPI_ISL_18009982, EPI_ISL_18009983                                                                                                                                                                                                                                                                                                                                                                                                             | Hospital Municipal De Jaguaribe                                                                          | Laboratório Central de Saúde Pública do Ceará                                                            |  | Tayna da Silva Fiuzza, Vânia Angélica Feitosa Viana, Shirlene Telmos Silva de Lima                                                                                               |
| EPI_ISL_18009984                                                                                                                                                                                                                                                                                                                                                                                                                                                 | Lab De Analises Clinicas De Cruz                                                                         | Laboratório Central de Saúde Pública do Ceará                                                            |  | Tayna da Silva Fiuzza, Vânia Angélica Feitosa Viana, Shirlene Telmos Silva de Lima                                                                                               |
| EPI_ISL_18009985, EPI_ISL_18009986                                                                                                                                                                                                                                                                                                                                                                                                                               | Hospital Municipal De Jaguaribe                                                                          | Laboratório Central de Saúde Pública do Ceará                                                            |  | Tayna da Silva Fiuzza, Vânia Angélica Feitosa Viana, Shirlene Telmos Silva de Lima                                                                                               |
| EPI_ISL_18009987                                                                                                                                                                                                                                                                                                                                                                                                                                                 | Hospital Sao Jose (Fortaleza)                                                                            | Laboratório Central de Saúde Pública do Ceará                                                            |  | Tayna da Silva Fiuzza, Vânia Angélica Feitosa Viana, Shirlene Telmos Silva de Lima                                                                                               |
| EPI_ISL_18009988, EPI_ISL_18009989, EPI_ISL_18009990, EPI_ISL_18009991                                                                                                                                                                                                                                                                                                                                                                                           | Lab De Analises Clinicas De Cruz                                                                         | Laboratório Central de Saúde Pública do Ceará                                                            |  | Tayna da Silva Fiuzza, Vânia Angélica Feitosa Viana, Shirlene Telmos Silva de Lima                                                                                               |
| EPI_ISL_18009992, EPI_ISL_18009993, EPI_ISL_18009994, EPI_ISL_18009995                                                                                                                                                                                                                                                                                                                                                                                           |                                                                                                          |                                                                                                          |  |                                                                                                                                                                                  |
| EPI_ISL_18009996                                                                                                                                                                                                                                                                                                                                                                                                                                                 | Hospital Municipal De Jaguaribe                                                                          | Laboratório Central de Saúde Pública do Ceará                                                            |  | Tayna da Silva Fiuzza, Vânia Angélica Feitosa Viana, Shirlene Telmos Silva de Lima                                                                                               |
| EPI_ISL_18009997                                                                                                                                                                                                                                                                                                                                                                                                                                                 | Casa De Saude Adilia Maria (Boa Viagem)                                                                  | Laboratório Central de Saúde Pública do Ceará                                                            |  | Tayna da Silva Fiuzza, Vânia Angélica Feitosa Viana, Shirlene Telmos Silva de Lima                                                                                               |



|                                                                                                                                                                                                                                                                                                                                                                                                                                                                                                                                                                                                                                                                                                                                                                                                                                                                                                                                                                                                                                                                                                                                                                                                                                                                                                                                                                                                                                                                                                                                                                                                                                                                                                                                                                                                                                                                                                                                                                                                                                                                                                                                                                                                                                                                                                                                                                                                                                                                                                                                                                                                                                                                                                                                                                                                                                                                                                                                                                                                                                                                                                                                                                                                                                                                                                                  |                                                     |                                                                                                              |                                                                                                              |                                                                                                                                                                                                                                                                                                                                                                                                                                                                                                                                                                                                                                                                                                                                                                       |
|------------------------------------------------------------------------------------------------------------------------------------------------------------------------------------------------------------------------------------------------------------------------------------------------------------------------------------------------------------------------------------------------------------------------------------------------------------------------------------------------------------------------------------------------------------------------------------------------------------------------------------------------------------------------------------------------------------------------------------------------------------------------------------------------------------------------------------------------------------------------------------------------------------------------------------------------------------------------------------------------------------------------------------------------------------------------------------------------------------------------------------------------------------------------------------------------------------------------------------------------------------------------------------------------------------------------------------------------------------------------------------------------------------------------------------------------------------------------------------------------------------------------------------------------------------------------------------------------------------------------------------------------------------------------------------------------------------------------------------------------------------------------------------------------------------------------------------------------------------------------------------------------------------------------------------------------------------------------------------------------------------------------------------------------------------------------------------------------------------------------------------------------------------------------------------------------------------------------------------------------------------------------------------------------------------------------------------------------------------------------------------------------------------------------------------------------------------------------------------------------------------------------------------------------------------------------------------------------------------------------------------------------------------------------------------------------------------------------------------------------------------------------------------------------------------------------------------------------------------------------------------------------------------------------------------------------------------------------------------------------------------------------------------------------------------------------------------------------------------------------------------------------------------------------------------------------------------------------------------------------------------------------------------------------------------------|-----------------------------------------------------|--------------------------------------------------------------------------------------------------------------|--------------------------------------------------------------------------------------------------------------|-----------------------------------------------------------------------------------------------------------------------------------------------------------------------------------------------------------------------------------------------------------------------------------------------------------------------------------------------------------------------------------------------------------------------------------------------------------------------------------------------------------------------------------------------------------------------------------------------------------------------------------------------------------------------------------------------------------------------------------------------------------------------|
| EPI_ISL_18103477, EPI_ISL_18103478, EPI_ISL_18103479, EPI_ISL_18103480, EPI_ISL_18103481, EPI_ISL_18103482, EPI_ISL_18103483, EPI_ISL_18103484, EPI_ISL_18103485, EPI_ISL_18103486, EPI_ISL_18103487, EPI_ISL_18103488, EPI_ISL_18103489                                                                                                                                                                                                                                                                                                                                                                                                                                                                                                                                                                                                                                                                                                                                                                                                                                                                                                                                                                                                                                                                                                                                                                                                                                                                                                                                                                                                                                                                                                                                                                                                                                                                                                                                                                                                                                                                                                                                                                                                                                                                                                                                                                                                                                                                                                                                                                                                                                                                                                                                                                                                                                                                                                                                                                                                                                                                                                                                                                                                                                                                         | see above                                           | Undisclosed Laboratory in Brazil for the Health Emergency Information and Risk Assessment (HIM) Unit of PAHO | Undisclosed Laboratory in Brazil for the Health Emergency Information and Risk Assessment (HIM) Unit of PAHO | Vazquez.C., Luiz Carlos Junior Alcantara, Vagner Fonseca, Mauricio Lima, Joilson Xavier, Adelino.T., Hegger Fritsch, Castro.E., de Oliveira.C., Schuab.G., Lima.A.R.J., Villalba.S., Gomez de la Fuente.A., Rojas.A., Cantero.C., Fleitas.F., Aquino.C., Ojeda.A., Sequera.G., Torales.J., Barrios.J., Elias.M.C., Iani.F.C.M., Ortega.M.J., Gamarra.M.L., Montoya.R., Rodrigues.E.S., Simone Kashima, Sampaio.S.C., Coluchi.N., Leite.J., Gresh.L., Franco.L., Lourenco.J., Rico.J.M., Bispo de Filippis.A.M. and Marta Giovanetti                                                                                                                                                                                                                                   |
| EPI_ISL_18103490                                                                                                                                                                                                                                                                                                                                                                                                                                                                                                                                                                                                                                                                                                                                                                                                                                                                                                                                                                                                                                                                                                                                                                                                                                                                                                                                                                                                                                                                                                                                                                                                                                                                                                                                                                                                                                                                                                                                                                                                                                                                                                                                                                                                                                                                                                                                                                                                                                                                                                                                                                                                                                                                                                                                                                                                                                                                                                                                                                                                                                                                                                                                                                                                                                                                                                 |                                                     | Undisclosed Laboratory in Brazil for the Health Emergency Information and Risk Assessment (HIM) Unit of PAHO | Undisclosed Laboratory in Brazil for the Health Emergency Information and Risk Assessment (HIM) Unit of PAHO | Hegger Fritsch, Moreno.K., Lima.I.A.B., Santos.C.S., Costa.B.G.G., de Almeida.B.L., Dos Santos,R.A., Francisco,M.V.L.O., Sampaio,M.P.S., de Mauricio LimaM., Pereira.F.M., Vagner Fonseca, Tosta,S., Joilson Xavier, de Oliveira,C., Adelino,T., de Mello,A.L.E.S., Graf,T., Luiz Carlos Junior Alcantara, Marta Giovanetti and de Siqueira,I.C.                                                                                                                                                                                                                                                                                                                                                                                                                      |
| EPI_ISL_18103491, EPI_ISL_18103492, EPI_ISL_18103493, EPI_ISL_18103494, EPI_ISL_18103495, EPI_ISL_18103496, EPI_ISL_18103497, EPI_ISL_18103498, EPI_ISL_18103499, EPI_ISL_18103500, EPI_ISL_18103501, EPI_ISL_18103502, EPI_ISL_18103503, EPI_ISL_18103504                                                                                                                                                                                                                                                                                                                                                                                                                                                                                                                                                                                                                                                                                                                                                                                                                                                                                                                                                                                                                                                                                                                                                                                                                                                                                                                                                                                                                                                                                                                                                                                                                                                                                                                                                                                                                                                                                                                                                                                                                                                                                                                                                                                                                                                                                                                                                                                                                                                                                                                                                                                                                                                                                                                                                                                                                                                                                                                                                                                                                                                       | see above                                           | Undisclosed Laboratory in Brazil for the Health Emergency Information and Risk Assessment (HIM) Unit of PAHO | Undisclosed Laboratory in Brazil for the Health Emergency Information and Risk Assessment (HIM) Unit of PAHO | Vazquez.C., Luiz Carlos Junior Alcantara, Vagner Fonseca, Mauricio Lima, Joilson Xavier, Adelino.T., Hegger Fritsch, Castro.E., de Oliveira.C., Schuab.G., Lima.A.R.J., Villalba.S., Gomez de la Fuente.A., Rojas.A., Cantero.C., Fleitas.F., Aquino.C., Ojeda.A., Sequera.G., Torales.J., Barrios.J., Elias.M.C., Iani.F.C.M., Ortega.M.J., Gamarra.M.L., Montoya.R., Rodrigues.E.S., Simone Kashima, Sampaio.S.C., Coluchi.N., Leite.J., Gresh.L., Franco.L., Lourenco.J., Rico.J.M., Bispo de Filippis.A.M. and Marta Giovanetti                                                                                                                                                                                                                                   |
| EPI_ISL_18103505                                                                                                                                                                                                                                                                                                                                                                                                                                                                                                                                                                                                                                                                                                                                                                                                                                                                                                                                                                                                                                                                                                                                                                                                                                                                                                                                                                                                                                                                                                                                                                                                                                                                                                                                                                                                                                                                                                                                                                                                                                                                                                                                                                                                                                                                                                                                                                                                                                                                                                                                                                                                                                                                                                                                                                                                                                                                                                                                                                                                                                                                                                                                                                                                                                                                                                 |                                                     | Undisclosed Laboratory in Brazil for the Health Emergency Information and Risk Assessment (HIM) Unit of PAHO | Undisclosed Laboratory in Brazil for the Health Emergency Information and Risk Assessment (HIM) Unit of PAHO | Hegger Fritsch, Moreno.K., Lima.I.A.B., Santos.C.S., Costa.B.G.G., de Almeida.B.L., Dos Santos,R.A., Francisco,M.V.L.O., Sampaio,M.P.S., de Mauricio LimaM., Pereira.F.M., Vagner Fonseca, Tosta,S., Joilson Xavier, de Oliveira,C., Adelino,T., de Mello,A.L.E.S., Graf,T., Luiz Carlos Junior Alcantara, Marta Giovanetti and de Siqueira,I.C.                                                                                                                                                                                                                                                                                                                                                                                                                      |
| EPI_ISL_18103506                                                                                                                                                                                                                                                                                                                                                                                                                                                                                                                                                                                                                                                                                                                                                                                                                                                                                                                                                                                                                                                                                                                                                                                                                                                                                                                                                                                                                                                                                                                                                                                                                                                                                                                                                                                                                                                                                                                                                                                                                                                                                                                                                                                                                                                                                                                                                                                                                                                                                                                                                                                                                                                                                                                                                                                                                                                                                                                                                                                                                                                                                                                                                                                                                                                                                                 |                                                     | Undisclosed Laboratory in Brazil for the Health Emergency Information and Risk Assessment (HIM) Unit of PAHO | Undisclosed Laboratory in Brazil for the Health Emergency Information and Risk Assessment (HIM) Unit of PAHO | Vazquez.C., Luiz Carlos Junior Alcantara, Vagner Fonseca, Mauricio Lima, Joilson Xavier, Adelino.T., Hegger Fritsch, Castro.E., de Oliveira.C., Schuab.G., Lima.A.R.J., Villalba.S., Gomez de la Fuente.A., Rojas.A., Cantero.C., Fleitas.F., Aquino.C., Ojeda.A., Sequera.G., Torales.J., Barrios.J., Elias.M.C., Iani.F.C.M., Ortega.M.J., Gamarra.M.L., Montoya.R., Rodrigues.E.S., Simone Kashima, Sampaio.S.C., Coluchi.N., Leite.J., Gresh.L., Franco.L., Lourenco.J., Rico.J.M., Bispo de Filippis.A.M. and Marta Giovanetti                                                                                                                                                                                                                                   |
| EPI_ISL_18103507                                                                                                                                                                                                                                                                                                                                                                                                                                                                                                                                                                                                                                                                                                                                                                                                                                                                                                                                                                                                                                                                                                                                                                                                                                                                                                                                                                                                                                                                                                                                                                                                                                                                                                                                                                                                                                                                                                                                                                                                                                                                                                                                                                                                                                                                                                                                                                                                                                                                                                                                                                                                                                                                                                                                                                                                                                                                                                                                                                                                                                                                                                                                                                                                                                                                                                 |                                                     | Undisclosed Laboratory in Brazil for the Health Emergency Information and Risk Assessment (HIM) Unit of PAHO | Undisclosed Laboratory in Brazil for the Health Emergency Information and Risk Assessment (HIM) Unit of PAHO | Hegger Fritsch, Moreno.K., Lima.I.A.B., Santos.C.S., Costa.B.G.G., de Almeida.B.L., Dos Santos,R.A., Francisco,M.V.L.O., Sampaio,M.P.S., de Mauricio LimaM., Pereira.F.M., Vagner Fonseca, Tosta,S., Joilson Xavier, de Oliveira,C., Adelino,T., de Mello,A.L.E.S., Graf,T., Luiz Carlos Junior Alcantara, Marta Giovanetti and de Siqueira,I.C.                                                                                                                                                                                                                                                                                                                                                                                                                      |
| EPI_ISL_18103508, EPI_ISL_18103509                                                                                                                                                                                                                                                                                                                                                                                                                                                                                                                                                                                                                                                                                                                                                                                                                                                                                                                                                                                                                                                                                                                                                                                                                                                                                                                                                                                                                                                                                                                                                                                                                                                                                                                                                                                                                                                                                                                                                                                                                                                                                                                                                                                                                                                                                                                                                                                                                                                                                                                                                                                                                                                                                                                                                                                                                                                                                                                                                                                                                                                                                                                                                                                                                                                                               |                                                     | Undisclosed Laboratory in Brazil for the Health Emergency Information and Risk Assessment (HIM) Unit of PAHO | Undisclosed Laboratory in Brazil for the Health Emergency Information and Risk Assessment (HIM) Unit of PAHO | Vazquez.C., Luiz Carlos Junior Alcantara, Vagner Fonseca, Mauricio Lima, Joilson Xavier, Adelino.T., Hegger Fritsch, Castro.E., de Oliveira.C., Schuab.G., Lima.A.R.J., Villalba.S., Gomez de la Fuente.A., Rojas.A., Cantero.C., Fleitas.F., Aquino.C., Ojeda.A., Sequera.G., Torales.J., Barrios.J., Elias.M.C., Iani.F.C.M., Ortega.M.J., Gamarra.M.L., Montoya.R., Rodrigues.E.S., Simone Kashima, Sampaio.S.C., Coluchi.N., Leite.J., Gresh.L., Franco.L., Lourenco.J., Rico.J.M., Bispo de Filippis.A.M. and Marta Giovanetti                                                                                                                                                                                                                                   |
| EPI_ISL_18103510                                                                                                                                                                                                                                                                                                                                                                                                                                                                                                                                                                                                                                                                                                                                                                                                                                                                                                                                                                                                                                                                                                                                                                                                                                                                                                                                                                                                                                                                                                                                                                                                                                                                                                                                                                                                                                                                                                                                                                                                                                                                                                                                                                                                                                                                                                                                                                                                                                                                                                                                                                                                                                                                                                                                                                                                                                                                                                                                                                                                                                                                                                                                                                                                                                                                                                 |                                                     | Undisclosed Laboratory in Brazil for the Health Emergency Information and Risk Assessment (HIM) Unit of PAHO | Undisclosed Laboratory in Brazil for the Health Emergency Information and Risk Assessment (HIM) Unit of PAHO | Hegger Fritsch, Moreno.K., Lima.I.A.B., Santos.C.S., Costa.B.G.G., de Almeida.B.L., Dos Santos,R.A., Francisco,M.V.L.O., Sampaio,M.P.S., de Mauricio LimaM., Pereira.F.M., Vagner Fonseca, Tosta,S., Joilson Xavier, de Oliveira,C., Adelino,T., de Mello,A.L.E.S., Graf,T., Luiz Carlos Junior Alcantara, Marta Giovanetti and de Siqueira,I.C.                                                                                                                                                                                                                                                                                                                                                                                                                      |
| EPI_ISL_18103511, EPI_ISL_18103512, EPI_ISL_18103513, EPI_ISL_18103514, EPI_ISL_18103515, EPI_ISL_18103516, EPI_ISL_18103517, EPI_ISL_18103518, EPI_ISL_18103519, EPI_ISL_18103520, EPI_ISL_18103521, EPI_ISL_18103522                                                                                                                                                                                                                                                                                                                                                                                                                                                                                                                                                                                                                                                                                                                                                                                                                                                                                                                                                                                                                                                                                                                                                                                                                                                                                                                                                                                                                                                                                                                                                                                                                                                                                                                                                                                                                                                                                                                                                                                                                                                                                                                                                                                                                                                                                                                                                                                                                                                                                                                                                                                                                                                                                                                                                                                                                                                                                                                                                                                                                                                                                           | see above                                           | Undisclosed Laboratory in Brazil for the Health Emergency Information and Risk Assessment (HIM) Unit of PAHO | Undisclosed Laboratory in Brazil for the Health Emergency Information and Risk Assessment (HIM) Unit of PAHO | Vazquez.C., Luiz Carlos Junior Alcantara, Vagner Fonseca, Mauricio Lima, Joilson Xavier, Adelino.T., Hegger Fritsch, Castro.E., de Oliveira.C., Schuab.G., Lima.A.R.J., Villalba.S., Gomez de la Fuente.A., Rojas.A., Cantero.C., Fleitas.F., Aquino.C., Ojeda.A., Sequera.G., Torales.J., Barrios.J., Elias.M.C., Iani.F.C.M., Ortega.M.J., Gamarra.M.L., Montoya.R., Rodrigues.E.S., Simone Kashima, Sampaio.S.C., Coluchi.N., Leite.J., Gresh.L., Franco.L., Lourenco.J., Rico.J.M., Bispo de Filippis.A.M. and Marta Giovanetti                                                                                                                                                                                                                                   |
| EPI_ISL_18103523                                                                                                                                                                                                                                                                                                                                                                                                                                                                                                                                                                                                                                                                                                                                                                                                                                                                                                                                                                                                                                                                                                                                                                                                                                                                                                                                                                                                                                                                                                                                                                                                                                                                                                                                                                                                                                                                                                                                                                                                                                                                                                                                                                                                                                                                                                                                                                                                                                                                                                                                                                                                                                                                                                                                                                                                                                                                                                                                                                                                                                                                                                                                                                                                                                                                                                 |                                                     | Undisclosed Laboratory in Brazil for the Health Emergency Information and Risk Assessment (HIM) Unit of PAHO | Undisclosed Laboratory in Brazil for the Health Emergency Information and Risk Assessment (HIM) Unit of PAHO | Hegger Fritsch, Moreno.K., Lima.I.A.B., Santos.C.S., Costa.B.G.G., de Almeida.B.L., Dos Santos,R.A., Francisco,M.V.L.O., Sampaio,M.P.S., de Mauricio LimaM., Pereira.F.M., Vagner Fonseca, Tosta,S., Joilson Xavier, de Oliveira,C., Adelino,T., de Mello,A.L.E.S., Graf,T., Luiz Carlos Junior Alcantara, Marta Giovanetti and de Siqueira,I.C.                                                                                                                                                                                                                                                                                                                                                                                                                      |
| EPI_ISL_18103524, EPI_ISL_18103525, EPI_ISL_18103526, EPI_ISL_18103527, EPI_ISL_18103528, EPI_ISL_18103529, EPI_ISL_18103530, EPI_ISL_18103531, EPI_ISL_18103532, EPI_ISL_18103533                                                                                                                                                                                                                                                                                                                                                                                                                                                                                                                                                                                                                                                                                                                                                                                                                                                                                                                                                                                                                                                                                                                                                                                                                                                                                                                                                                                                                                                                                                                                                                                                                                                                                                                                                                                                                                                                                                                                                                                                                                                                                                                                                                                                                                                                                                                                                                                                                                                                                                                                                                                                                                                                                                                                                                                                                                                                                                                                                                                                                                                                                                                               |                                                     | Undisclosed Laboratory in Brazil for the Health Emergency Information and Risk Assessment (HIM) Unit of PAHO | Undisclosed Laboratory in Brazil for the Health Emergency Information and Risk Assessment (HIM) Unit of PAHO | Vazquez.C., Luiz Carlos Junior Alcantara, Vagner Fonseca, Mauricio Lima, Joilson Xavier, Adelino.T., Hegger Fritsch, Castro.E., de Oliveira.C., Schuab.G., Lima.A.R.J., Villalba.S., Gomez de la Fuente.A., Rojas.A., Cantero.C., Fleitas.F., Aquino.C., Ojeda.A., Sequera.G., Torales.J., Barrios.J., Elias.M.C., Iani.F.C.M., Ortega.M.J., Gamarra.M.L., Montoya.R., Rodrigues.E.S., Simone Kashima, Sampaio.S.C., Coluchi.N., Leite.J., Gresh.L., Franco.L., Lourenco.J., Rico.J.M., Bispo de Filippis.A.M. and Marta Giovanetti                                                                                                                                                                                                                                   |
| EPI_ISL_18358948, EPI_ISL_18358949, EPI_ISL_18358950, EPI_ISL_18358951, EPI_ISL_18358952, EPI_ISL_18358953, EPI_ISL_18358954, EPI_ISL_18358955, EPI_ISL_18358956, EPI_ISL_18358957, EPI_ISL_18358958, EPI_ISL_18358959, EPI_ISL_18358960, EPI_ISL_18358961, EPI_ISL_18358962, EPI_ISL_18358963, EPI_ISL_18358964, EPI_ISL_18358965, EPI_ISL_18358966, EPI_ISL_18358967, EPI_ISL_18358968, EPI_ISL_18358969, EPI_ISL_18358970, EPI_ISL_18358971, EPI_ISL_18358972, EPI_ISL_18358973, EPI_ISL_18358974, EPI_ISL_18358975, EPI_ISL_18358976, EPI_ISL_18358977, EPI_ISL_18358978, EPI_ISL_18358979                                                                                                                                                                                                                                                                                                                                                                                                                                                                                                                                                                                                                                                                                                                                                                                                                                                                                                                                                                                                                                                                                                                                                                                                                                                                                                                                                                                                                                                                                                                                                                                                                                                                                                                                                                                                                                                                                                                                                                                                                                                                                                                                                                                                                                                                                                                                                                                                                                                                                                                                                                                                                                                                                                                   | see above                                           | Institut Pasteur de la Guadeloupe                                                                            | Institut Pasteur de la Guadeloupe                                                                            | Garcia-Van Smevoorde.M., Kiorowski.G., Embouile.L., Dos Santos,G., Loraux.C., Guyomard-Rabenirina,S., Joannes.M.O., Fagour.L., Najjoulah.F., Cabié.A., de Lamballerie.X., Vega-Rua.A., Cesaire.R. and Calvez.E.                                                                                                                                                                                                                                                                                                                                                                                                                                                                                                                                                       |
| EPI_ISL_18360767, EPI_ISL_18360768, EPI_ISL_18360769, EPI_ISL_18360770, EPI_ISL_18360771, EPI_ISL_18360772, EPI_ISL_18360773, EPI_ISL_18360774, EPI_ISL_18360775, EPI_ISL_18360776, EPI_ISL_18360777, EPI_ISL_18360778, EPI_ISL_18360779, EPI_ISL_18360780, EPI_ISL_18360781, EPI_ISL_18360782, EPI_ISL_18360783, EPI_ISL_18360784, EPI_ISL_18360785, EPI_ISL_18360786, EPI_ISL_18360787, EPI_ISL_18360788, EPI_ISL_18360789, EPI_ISL_18360790, EPI_ISL_18360791, EPI_ISL_18360792, EPI_ISL_18360793, EPI_ISL_18360794, EPI_ISL_18360795, EPI_ISL_18360796, EPI_ISL_18360797, EPI_ISL_18360798, EPI_ISL_18360799, EPI_ISL_18360800, EPI_ISL_18360801, EPI_ISL_18360802, EPI_ISL_18360803, EPI_ISL_18360804, EPI_ISL_18360805, EPI_ISL_18360806, EPI_ISL_18360807, EPI_ISL_18360808, EPI_ISL_18360809, EPI_ISL_18360810, EPI_ISL_18360811, EPI_ISL_18360812, EPI_ISL_18360813, EPI_ISL_18360814, EPI_ISL_18360815, EPI_ISL_18360816, EPI_ISL_18360817, EPI_ISL_18360818, EPI_ISL_18360819, EPI_ISL_18360820, EPI_ISL_18360821, EPI_ISL_18360822, EPI_ISL_18360823, EPI_ISL_18360824, EPI_ISL_18360825, EPI_ISL_18360826, EPI_ISL_18360827, EPI_ISL_18360828, EPI_ISL_18360829, EPI_ISL_18360830, EPI_ISL_18360831, EPI_ISL_18360832, EPI_ISL_18360833, EPI_ISL_18360834, EPI_ISL_18360835, EPI_ISL_18360836, EPI_ISL_18360837, EPI_ISL_18360838, EPI_ISL_18360839, EPI_ISL_18360840, EPI_ISL_18360841, EPI_ISL_18360842, EPI_ISL_18360843, EPI_ISL_18360844, EPI_ISL_18360845, EPI_ISL_18360846, EPI_ISL_18360847, EPI_ISL_18360848, EPI_ISL_18360849, EPI_ISL_18360850, EPI_ISL_18360851, EPI_ISL_18360852, EPI_ISL_18360853, EPI_ISL_18360854, EPI_ISL_18360855, EPI_ISL_18360856, EPI_ISL_18360857, EPI_ISL_18360858, EPI_ISL_18360859, EPI_ISL_18360860, EPI_ISL_18360861, EPI_ISL_18360862, EPI_ISL_18360863, EPI_ISL_18360864, EPI_ISL_18360865, EPI_ISL_18360866, EPI_ISL_18360867, EPI_ISL_18360868, EPI_ISL_18360869, EPI_ISL_18360870, EPI_ISL_18360871, EPI_ISL_18360872, EPI_ISL_18360873, EPI_ISL_18360874, EPI_ISL_18360875, EPI_ISL_18360876, EPI_ISL_18360877, EPI_ISL_18360878, EPI_ISL_18360879, EPI_ISL_18360880, EPI_ISL_18360881, EPI_ISL_18360882, EPI_ISL_18360883, EPI_ISL_18360884, EPI_ISL_18360885, EPI_ISL_18360886, EPI_ISL_18360887, EPI_ISL_18360888, EPI_ISL_18360889, EPI_ISL_18360890, EPI_ISL_18360891, EPI_ISL_18360892, EPI_ISL_18360893, EPI_ISL_18360894, EPI_ISL_18360895, EPI_ISL_18360896, EPI_ISL_18360897, EPI_ISL_18360898, EPI_ISL_18360899, EPI_ISL_18360900, EPI_ISL_18360901, EPI_ISL_18360902, EPI_ISL_18360903, EPI_ISL_18360904, EPI_ISL_18360905, EPI_ISL_18360906, EPI_ISL_18360907, EPI_ISL_18360908, EPI_ISL_18360909, EPI_ISL_18360910, EPI_ISL_18360911, EPI_ISL_18360912, EPI_ISL_18360913, EPI_ISL_18360914, EPI_ISL_18360915, EPI_ISL_18360916, EPI_ISL_18360917, EPI_ISL_18360918, EPI_ISL_18360919, EPI_ISL_18360920, EPI_ISL_18360921, EPI_ISL_18360922, EPI_ISL_18360923, EPI_ISL_18360924, EPI_ISL_18360925, EPI_ISL_18360926, EPI_ISL_18360927, EPI_ISL_18360928, EPI_ISL_18360929, EPI_ISL_18360930, EPI_ISL_18360931, EPI_ISL_18360932, EPI_ISL_18360933, EPI_ISL_18360934, EPI_ISL_18360935, EPI_ISL_18360936, EPI_ISL_18360937, EPI_ISL_18360938, EPI_ISL_18360939, EPI_ISL_18360940, EPI_ISL_18360941, EPI_ISL_18360942, EPI_ISL_18360943 | see above                                           | Laboratório Central de Saúde Pública do Estado de Mato Grosso do Sul                                         | Laboratório Central de Saúde Pública do Estado de Mato Grosso do Sul                                         | Larissa Domingues Castilho de Arruda, Marta Giovanetti, Vagner Fonseca, Marina Castilhos Souza Umaki Zardin, Gislene Garcia de Castro Lichs, Sílvia Asato, Ana Olivia Pascolo Esposito, Miriam Tokeshi Müller, Joilson Xavier, Hegger Fritsch, Mauricio Lima, Carla de Oliveira, Elaine Vieira Santos, Lívia de Mello Almeida Maziero, Danila Fernanda Rodrigues Frias, Danielle Ahd das Neves, Liliane Ferreira da Silva, Ellen Caroline Rodrigues Barretos, Paulo Eduardo Tsuchi Oshiro, Bianca Modafari Goday, Jessica Klener Lemos dos Santos, Simone Kashima, Carlos F. C. de Albuquerque, Rodrigo Fabiano do Carmo Said, Alexander Rosewell, Luiz Henrique Ferraz Demarchi, Julio Croda, Luiz Carlos Junior Alcantara and Christine Cavaleiro Maymone Gonçalves |
| EPI_ISL_18414933                                                                                                                                                                                                                                                                                                                                                                                                                                                                                                                                                                                                                                                                                                                                                                                                                                                                                                                                                                                                                                                                                                                                                                                                                                                                                                                                                                                                                                                                                                                                                                                                                                                                                                                                                                                                                                                                                                                                                                                                                                                                                                                                                                                                                                                                                                                                                                                                                                                                                                                                                                                                                                                                                                                                                                                                                                                                                                                                                                                                                                                                                                                                                                                                                                                                                                 | National University of Singapore                    | National University of Singapore                                                                             | National University of Singapore                                                                             | Chin,W.X., Teo,Z.Y. and Chu,J.J.H.                                                                                                                                                                                                                                                                                                                                                                                                                                                                                                                                                                                                                                                                                                                                    |
| EPI_ISL_18474688, EPI_ISL_18474689                                                                                                                                                                                                                                                                                                                                                                                                                                                                                                                                                                                                                                                                                                                                                                                                                                                                                                                                                                                                                                                                                                                                                                                                                                                                                                                                                                                                                                                                                                                                                                                                                                                                                                                                                                                                                                                                                                                                                                                                                                                                                                                                                                                                                                                                                                                                                                                                                                                                                                                                                                                                                                                                                                                                                                                                                                                                                                                                                                                                                                                                                                                                                                                                                                                                               | Universidad de Antioquia                            | Universidad de Antioquia                                                                                     | Universidad de Antioquia                                                                                     | Ciuderis,K.A., Usuga,J., Moreno-Lopez,I., Perez-Restrepo,L.S., Florez,D.Y., Hernandez-Ortiz,J.P., Cloherty,G.A. and Osorio,J.E.                                                                                                                                                                                                                                                                                                                                                                                                                                                                                                                                                                                                                                       |
| EPI_ISL_18474690                                                                                                                                                                                                                                                                                                                                                                                                                                                                                                                                                                                                                                                                                                                                                                                                                                                                                                                                                                                                                                                                                                                                                                                                                                                                                                                                                                                                                                                                                                                                                                                                                                                                                                                                                                                                                                                                                                                                                                                                                                                                                                                                                                                                                                                                                                                                                                                                                                                                                                                                                                                                                                                                                                                                                                                                                                                                                                                                                                                                                                                                                                                                                                                                                                                                                                 | Universidad de Antioquia                            | Universidad de Antioquia                                                                                     | Universidad de Antioquia                                                                                     | Ciuderis,K.A., Moreno-Lopez,I., Usuga-Restrepo,J.A., Perez-Restrepo,L.S., Florez,D.Y., Hernandez-Ortiz,J.P., Cloherty,G.A. and Osorio,J.E.                                                                                                                                                                                                                                                                                                                                                                                                                                                                                                                                                                                                                            |
| EPI_ISL_18474691                                                                                                                                                                                                                                                                                                                                                                                                                                                                                                                                                                                                                                                                                                                                                                                                                                                                                                                                                                                                                                                                                                                                                                                                                                                                                                                                                                                                                                                                                                                                                                                                                                                                                                                                                                                                                                                                                                                                                                                                                                                                                                                                                                                                                                                                                                                                                                                                                                                                                                                                                                                                                                                                                                                                                                                                                                                                                                                                                                                                                                                                                                                                                                                                                                                                                                 | Universidad de Antioquia                            | Universidad de Antioquia                                                                                     | Universidad de Antioquia                                                                                     | Ciuderis,K.A., Usuga,J., Moreno-Lopez,I., Perez-Restrepo,L.S., Florez,D.Y., Hernandez-Ortiz,J.P., Cloherty,G.A. and Osorio,J.E.                                                                                                                                                                                                                                                                                                                                                                                                                                                                                                                                                                                                                                       |
| EPI_ISL_18474692                                                                                                                                                                                                                                                                                                                                                                                                                                                                                                                                                                                                                                                                                                                                                                                                                                                                                                                                                                                                                                                                                                                                                                                                                                                                                                                                                                                                                                                                                                                                                                                                                                                                                                                                                                                                                                                                                                                                                                                                                                                                                                                                                                                                                                                                                                                                                                                                                                                                                                                                                                                                                                                                                                                                                                                                                                                                                                                                                                                                                                                                                                                                                                                                                                                                                                 | Universidad de Antioquia                            | Universidad de Antioquia                                                                                     | Universidad de Antioquia                                                                                     | Ciuderis,K., Usuga,J., Moreno-Lopez,I., Perez-Restrepo,L., Florez,D., Hernandez-Ortiz,J., Cloherty,G. and Osorio,J.                                                                                                                                                                                                                                                                                                                                                                                                                                                                                                                                                                                                                                                   |
| EPI_ISL_18474693, EPI_ISL_18474694                                                                                                                                                                                                                                                                                                                                                                                                                                                                                                                                                                                                                                                                                                                                                                                                                                                                                                                                                                                                                                                                                                                                                                                                                                                                                                                                                                                                                                                                                                                                                                                                                                                                                                                                                                                                                                                                                                                                                                                                                                                                                                                                                                                                                                                                                                                                                                                                                                                                                                                                                                                                                                                                                                                                                                                                                                                                                                                                                                                                                                                                                                                                                                                                                                                                               | Universidad de Antioquia                            | Universidad de Antioquia                                                                                     | Universidad de Antioquia                                                                                     | Ciuderis,K.A., Moreno-Lopez,I., Usuga-Restrepo,J.A., Perez-Restrepo,L.S., Florez,D.Y., Hernandez-Ortiz,J.P., Cloherty,G.A. and Osorio,J.E.                                                                                                                                                                                                                                                                                                                                                                                                                                                                                                                                                                                                                            |
| EPI_ISL_18474695, EPI_ISL_18474696, EPI_ISL_18474697, EPI_ISL_18474698, EPI_ISL_18474699, EPI_ISL_18474700, EPI_ISL_18474701                                                                                                                                                                                                                                                                                                                                                                                                                                                                                                                                                                                                                                                                                                                                                                                                                                                                                                                                                                                                                                                                                                                                                                                                                                                                                                                                                                                                                                                                                                                                                                                                                                                                                                                                                                                                                                                                                                                                                                                                                                                                                                                                                                                                                                                                                                                                                                                                                                                                                                                                                                                                                                                                                                                                                                                                                                                                                                                                                                                                                                                                                                                                                                                     | Universidad de Antioquia                            | Universidad de Antioquia                                                                                     | Universidad de Antioquia                                                                                     | Ciuderis,K.A., Usuga,J., Moreno-Lopez,I., Perez-Restrepo,L.S., Florez,D.Y., Hernandez-Ortiz,J.P., Cloherty,G.A. and Osorio,J.E.                                                                                                                                                                                                                                                                                                                                                                                                                                                                                                                                                                                                                                       |
| EPI_ISL_18474702                                                                                                                                                                                                                                                                                                                                                                                                                                                                                                                                                                                                                                                                                                                                                                                                                                                                                                                                                                                                                                                                                                                                                                                                                                                                                                                                                                                                                                                                                                                                                                                                                                                                                                                                                                                                                                                                                                                                                                                                                                                                                                                                                                                                                                                                                                                                                                                                                                                                                                                                                                                                                                                                                                                                                                                                                                                                                                                                                                                                                                                                                                                                                                                                                                                                                                 | Universidad de Antioquia                            | Universidad de Antioquia                                                                                     | Universidad de Antioquia                                                                                     | Ciuderis,K.A., Moreno-Lopez,I., Usuga-Restrepo,J.A., Perez-Restrepo,L.S., Florez,D.Y., Hernandez-Ortiz,J.P., Cloherty,G.A. and Osorio,J.E.                                                                                                                                                                                                                                                                                                                                                                                                                                                                                                                                                                                                                            |
| EPI_ISL_18474703, EPI_ISL_18474704, EPI_ISL_18474705, EPI_ISL_18474706, EPI_ISL_18474707, EPI_ISL_18474708                                                                                                                                                                                                                                                                                                                                                                                                                                                                                                                                                                                                                                                                                                                                                                                                                                                                                                                                                                                                                                                                                                                                                                                                                                                                                                                                                                                                                                                                                                                                                                                                                                                                                                                                                                                                                                                                                                                                                                                                                                                                                                                                                                                                                                                                                                                                                                                                                                                                                                                                                                                                                                                                                                                                                                                                                                                                                                                                                                                                                                                                                                                                                                                                       | Universidad de Antioquia                            | Universidad de Antioquia                                                                                     | Universidad de Antioquia                                                                                     | Ciuderis,K.A., Usuga,J., Moreno-Lopez,I., Perez-Restrepo,L.S., Florez,D.Y., Hernandez-Ortiz,J.P., Cloherty,G.A. and Osorio,J.E.                                                                                                                                                                                                                                                                                                                                                                                                                                                                                                                                                                                                                                       |
| EPI_ISL_18474709                                                                                                                                                                                                                                                                                                                                                                                                                                                                                                                                                                                                                                                                                                                                                                                                                                                                                                                                                                                                                                                                                                                                                                                                                                                                                                                                                                                                                                                                                                                                                                                                                                                                                                                                                                                                                                                                                                                                                                                                                                                                                                                                                                                                                                                                                                                                                                                                                                                                                                                                                                                                                                                                                                                                                                                                                                                                                                                                                                                                                                                                                                                                                                                                                                                                                                 | Universidad de Antioquia                            | Universidad de Antioquia                                                                                     | Universidad de Antioquia                                                                                     | Ciuderis,K.A., Moreno-Lopez,I., Usuga-Restrepo,J.A., Perez-Restrepo,L.S., Florez,D.Y., Hernandez-Ortiz,J.P., Cloherty,G.A. and Osorio,J.E.                                                                                                                                                                                                                                                                                                                                                                                                                                                                                                                                                                                                                            |
| EPI_ISL_18474710                                                                                                                                                                                                                                                                                                                                                                                                                                                                                                                                                                                                                                                                                                                                                                                                                                                                                                                                                                                                                                                                                                                                                                                                                                                                                                                                                                                                                                                                                                                                                                                                                                                                                                                                                                                                                                                                                                                                                                                                                                                                                                                                                                                                                                                                                                                                                                                                                                                                                                                                                                                                                                                                                                                                                                                                                                                                                                                                                                                                                                                                                                                                                                                                                                                                                                 | Universidad de Antioquia                            | Universidad de Antioquia                                                                                     | Universidad de Antioquia                                                                                     | Ciuderis,K.A., Usuga,J., Moreno-Lopez,I., Perez-Restrepo,L.S., Florez,D.Y., Hernandez-Ortiz,J.P., Cloherty,G.A. and Osorio,J.E.                                                                                                                                                                                                                                                                                                                                                                                                                                                                                                                                                                                                                                       |
| EPI_ISL_18474711, EPI_ISL_18474712, EPI_ISL_18474713, EPI_ISL_18474714, EPI_ISL_18474715                                                                                                                                                                                                                                                                                                                                                                                                                                                                                                                                                                                                                                                                                                                                                                                                                                                                                                                                                                                                                                                                                                                                                                                                                                                                                                                                                                                                                                                                                                                                                                                                                                                                                                                                                                                                                                                                                                                                                                                                                                                                                                                                                                                                                                                                                                                                                                                                                                                                                                                                                                                                                                                                                                                                                                                                                                                                                                                                                                                                                                                                                                                                                                                                                         | Universidad de Antioquia                            | Universidad de Antioquia                                                                                     | Universidad de Antioquia                                                                                     | Ciuderis,K.A., Moreno-Lopez,I., Usuga-Restrepo,J.A., Perez-Restrepo,L.S., Florez,D.Y., Hernandez-Ortiz,J.P., Cloherty,G.A. and Osorio,J.E.                                                                                                                                                                                                                                                                                                                                                                                                                                                                                                                                                                                                                            |
| EPI_ISL_18474716, EPI_ISL_18474717, EPI_ISL_18474718                                                                                                                                                                                                                                                                                                                                                                                                                                                                                                                                                                                                                                                                                                                                                                                                                                                                                                                                                                                                                                                                                                                                                                                                                                                                                                                                                                                                                                                                                                                                                                                                                                                                                                                                                                                                                                                                                                                                                                                                                                                                                                                                                                                                                                                                                                                                                                                                                                                                                                                                                                                                                                                                                                                                                                                                                                                                                                                                                                                                                                                                                                                                                                                                                                                             | Universidad de Antioquia                            | Universidad de Antioquia                                                                                     | Universidad de Antioquia                                                                                     | Ciuderis,K.A., Usuga,J., Moreno-Lopez,I., Perez-Restrepo,L.S., Florez,D.Y., Hernandez-Ortiz,J.P., Cloherty,G.A. and Osorio,J.E.                                                                                                                                                                                                                                                                                                                                                                                                                                                                                                                                                                                                                                       |
| EPI_ISL_18474719                                                                                                                                                                                                                                                                                                                                                                                                                                                                                                                                                                                                                                                                                                                                                                                                                                                                                                                                                                                                                                                                                                                                                                                                                                                                                                                                                                                                                                                                                                                                                                                                                                                                                                                                                                                                                                                                                                                                                                                                                                                                                                                                                                                                                                                                                                                                                                                                                                                                                                                                                                                                                                                                                                                                                                                                                                                                                                                                                                                                                                                                                                                                                                                                                                                                                                 | Universidad de Antioquia                            | Universidad de Antioquia                                                                                     | Universidad de Antioquia                                                                                     | Ciuderis,K.A., Moreno-Lopez,I., Usuga-Restrepo,J.A., Perez-Restrepo,L.S., Florez,D.Y., Hernandez-Ortiz,J.P., Cloherty,G.A. and Osorio,J.E.                                                                                                                                                                                                                                                                                                                                                                                                                                                                                                                                                                                                                            |
| EPI_ISL_18474720, EPI_ISL_18474721, EPI_ISL_18474722, EPI_ISL_18474723, EPI_ISL_18474724                                                                                                                                                                                                                                                                                                                                                                                                                                                                                                                                                                                                                                                                                                                                                                                                                                                                                                                                                                                                                                                                                                                                                                                                                                                                                                                                                                                                                                                                                                                                                                                                                                                                                                                                                                                                                                                                                                                                                                                                                                                                                                                                                                                                                                                                                                                                                                                                                                                                                                                                                                                                                                                                                                                                                                                                                                                                                                                                                                                                                                                                                                                                                                                                                         | Universidad de Antioquia                            | Universidad de Antioquia                                                                                     | Universidad de Antioquia                                                                                     | Ciuderis,K.A., Usuga,J., Moreno-Lopez,I., Perez-Restrepo,L.S., Florez,D.Y., Hernandez-Ortiz,J.P., Cloherty,G.A. and Osorio,J.E.                                                                                                                                                                                                                                                                                                                                                                                                                                                                                                                                                                                                                                       |
| EPI_ISL_18474725                                                                                                                                                                                                                                                                                                                                                                                                                                                                                                                                                                                                                                                                                                                                                                                                                                                                                                                                                                                                                                                                                                                                                                                                                                                                                                                                                                                                                                                                                                                                                                                                                                                                                                                                                                                                                                                                                                                                                                                                                                                                                                                                                                                                                                                                                                                                                                                                                                                                                                                                                                                                                                                                                                                                                                                                                                                                                                                                                                                                                                                                                                                                                                                                                                                                                                 | Universidad de Antioquia                            | Universidad de Antioquia                                                                                     | Universidad de Antioquia                                                                                     | Ciuderis,K.A., Moreno-Lopez,I., Usuga-Restrepo,J.A., Perez-Restrepo,L.S., Florez,D.Y., Hernandez-Ortiz,J.P., Cloherty,G.A. and Osorio,J.E.                                                                                                                                                                                                                                                                                                                                                                                                                                                                                                                                                                                                                            |
| EPI_ISL_18474726, EPI_ISL_18474727, EPI_ISL_18474728, EPI_ISL_18474729                                                                                                                                                                                                                                                                                                                                                                                                                                                                                                                                                                                                                                                                                                                                                                                                                                                                                                                                                                                                                                                                                                                                                                                                                                                                                                                                                                                                                                                                                                                                                                                                                                                                                                                                                                                                                                                                                                                                                                                                                                                                                                                                                                                                                                                                                                                                                                                                                                                                                                                                                                                                                                                                                                                                                                                                                                                                                                                                                                                                                                                                                                                                                                                                                                           | Universidad de Antioquia                            | Universidad de Antioquia                                                                                     | Universidad de Antioquia                                                                                     | Ciuderis,K.A., Usuga,J., Moreno-Lopez,I., Perez-Restrepo,L.S., Florez,D.Y., Hernandez-Ortiz,J.P., Cloherty,G.A. and Osorio,J.E.                                                                                                                                                                                                                                                                                                                                                                                                                                                                                                                                                                                                                                       |
| EPI_ISL_18474730, EPI_ISL_18474736, EPI_ISL_18474752, EPI_ISL_18474770, EPI_ISL_18474787, EPI_ISL_18474814, EPI_ISL_18474819, EPI_ISL_18474834                                                                                                                                                                                                                                                                                                                                                                                                                                                                                                                                                                                                                                                                                                                                                                                                                                                                                                                                                                                                                                                                                                                                                                                                                                                                                                                                                                                                                                                                                                                                                                                                                                                                                                                                                                                                                                                                                                                                                                                                                                                                                                                                                                                                                                                                                                                                                                                                                                                                                                                                                                                                                                                                                                                                                                                                                                                                                                                                                                                                                                                                                                                                                                   | unknown                                             | unknown                                                                                                      | unknown                                                                                                      | Fonseca,V., Giovanetti,M., Xavier,J., Oliveira,C., Lima,M., Barbosa,E., Guimaraes,N., Adelino,T., Fritsch,H., Mendonca,M., Bispo Filippis,A. and Alcantara,L.                                                                                                                                                                                                                                                                                                                                                                                                                                                                                                                                                                                                         |
| EPI_ISL_18560746, EPI_ISL_18560747, EPI_ISL_18560748                                                                                                                                                                                                                                                                                                                                                                                                                                                                                                                                                                                                                                                                                                                                                                                                                                                                                                                                                                                                                                                                                                                                                                                                                                                                                                                                                                                                                                                                                                                                                                                                                                                                                                                                                                                                                                                                                                                                                                                                                                                                                                                                                                                                                                                                                                                                                                                                                                                                                                                                                                                                                                                                                                                                                                                                                                                                                                                                                                                                                                                                                                                                                                                                                                                             | NC - Biological Sciences,NC - Redeemer's University | NC - Biological Sciences,NC - Redeemer's University                                                          | NC - Biological Sciences,NC - Redeemer's University                                                          | Onoja,B.A., Oguzie,J.U., George,J.E., Asoh,K.E., Ajayi,P., Omofaye,T.F., Igeleke,I.O., Eromon,P., Harouna,S., Parker,E., Adeniji,A.J. and Happi,C.T.                                                                                                                                                                                                                                                                                                                                                                                                                                                                                                                                                                                                                  |
| EPI_ISL_18579214, EPI_ISL_18579215, EPI_ISL_18579216, EPI_ISL_18579217, EPI_ISL_18579218, EPI_ISL_18579219, EPI_ISL_18579220, EPI_ISL_18579221, EPI_ISL_18579222, EPI_ISL_18579223, EPI_ISL_18579224, EPI_ISL_18579225, EPI_ISL_18579226, EPI_ISL_18579227, EPI_ISL_18579228, EPI_ISL_18579229, EPI_ISL_18579230, EPI_ISL_18579231, EPI_ISL_18579232, EPI_ISL_18579233, EPI_ISL_18579234, EPI_ISL_18579235, EPI_ISL_18579236, EPI_ISL_18579237, EPI_ISL_18579238, EPI_ISL_18579239, EPI_ISL_18579240, EPI_ISL_18579241, EPI_ISL_18579242, EPI_ISL_18579243, EPI_ISL_18579244, EPI_ISL_18579245, EPI_ISL_18579246, EPI_ISL_18579247, EPI_ISL_18579248, EPI_ISL_18579249, EPI_ISL_18579250, EPI_ISL_18579251, EPI_ISL_18579252, EPI_ISL_18579253, EPI_ISL_18579254, EPI_ISL_18579255, EPI_ISL_18579256, EPI_ISL_18579257, EPI_ISL_18579258, EPI_ISL_18579259, EPI_ISL_18579260, EPI_ISL_18579261, EPI_ISL_18579262, EPI_ISL_18579263, EPI_ISL_18579264, EPI_ISL_18579265, EPI_ISL_18579266, EPI_ISL_18579267, EPI_ISL_18579268, EPI_ISL_18579269, EPI_ISL_18579270, EPI_ISL_18579271, EPI_ISL_18579272, EPI_ISL_18579273, EPI_ISL_18579274, EPI_ISL_18579275, EPI_ISL_18579276, EPI_ISL_18579277, EPI_ISL_18579278, EPI_ISL_18579279, EPI_ISL_18579280                                                                                                                                                                                                                                                                                                                                                                                                                                                                                                                                                                                                                                                                                                                                                                                                                                                                                                                                                                                                                                                                                                                                                                                                                                                                                                                                                                                                                                                                                                                                                                                                                                                                                                                                                                                                                                                                                                                                                                                                                                                             | see above                                           | University of Western Australia                                                                              | University of Western Australia                                                                              | Harapan,H., Ernst,T., Panta,K., McCarthy,S., Michie,A., Sasmono,R.T., Smith,D.W., Effler,P.V. and Imrie,A.                                                                                                                                                                                                                                                                                                                                                                                                                                                                                                                                                                                                                                                            |
| EPI_ISL_18607159, EPI_ISL_18607160, EPI_ISL_18607161, EPI_ISL_18607162, EPI_ISL_18607163, EPI_ISL_18607164, EPI_ISL_18607165, EPI_ISL_18607166, EPI_ISL_18607167                                                                                                                                                                                                                                                                                                                                                                                                                                                                                                                                                                                                                                                                                                                                                                                                                                                                                                                                                                                                                                                                                                                                                                                                                                                                                                                                                                                                                                                                                                                                                                                                                                                                                                                                                                                                                                                                                                                                                                                                                                                                                                                                                                                                                                                                                                                                                                                                                                                                                                                                                                                                                                                                                                                                                                                                                                                                                                                                                                                                                                                                                                                                                 | Oswaldo Cruz Foundation, Instituto Carlos Chagas    | Oswaldo Cruz Foundation, Instituto Carlos Chagas                                                             | Oswaldo Cruz Foundation, Instituto Carlos Chagas                                                             | de Arruda,T.B., Bavia,L., Mosimann,A.L.P., Aoki,M.N., Sarzi,M.L., Conchon-Costa,I., Wovk,P.F., Duarte Dos Santos,C.N., Pavanelli,W.R., Silveira,G.F. and Bordignon,J.                                                                                                                                                                                                                                                                                                                                                                                                                                                                                                                                                                                                 |
| EPI_ISL_18689287, EPI_ISL_18689288, EPI_ISL_18689289, EPI_ISL_18689290, EPI_ISL_18689291, EPI_ISL_18689292, EPI_ISL_18689293, EPI_ISL_18689294, EPI_ISL_18689295, EPI_ISL_18689296, EPI_ISL_18689297, EPI_ISL_18689298, EPI_ISL_18689299, EPI_ISL_18689300, EPI_ISL_18689301, EPI_ISL_18689302, EPI_ISL_18689303, EPI_ISL_18689304, EPI_ISL_18689305, EPI_ISL_18689306, EPI_ISL_18689307, EPI_ISL_18689308, EPI_ISL_18689309, EPI_ISL_18689310, EPI_ISL_18689311, EPI_ISL_18689312, EPI_ISL_18689313, EPI_ISL_18689314, EPI_ISL_18689315, EPI_ISL_18689316, EPI_ISL_18689317, EPI_ISL_18689318, EPI_ISL_18689319, EPI_ISL_18689320, EPI_ISL_18689321, EPI_ISL_18689322, EPI_ISL_18689323, EPI_ISL_18689324, EPI_ISL_18689325, EPI_ISL_18689326, EPI_ISL_18689327, EPI_ISL_18689328, EPI_ISL_18689329, EPI_ISL_18689330, EPI_ISL_18689331, EPI_ISL_18689332, EPI_ISL_18689333, EPI_ISL_18689334, EPI_ISL_18689335, EPI_ISL_18689336, EPI_ISL_18689337, EPI_ISL_18689338, EPI_ISL_18689339, EPI_ISL_18689340, EPI_ISL_18689341, EPI_ISL_18689342, EPI_ISL_18689343, EPI_ISL_18689344, EPI_ISL_18689345, EPI_ISL_18689346, EPI_ISL_18689347, EPI_ISL_18689348                                                                                                                                                                                                                                                                                                                                                                                                                                                                                                                                                                                                                                                                                                                                                                                                                                                                                                                                                                                                                                                                                                                                                                                                                                                                                                                                                                                                                                                                                                                                                                                                                                                                                                                                                                                                                                                                                                                                                                                                                                                                                                                                                       |                                                     |                                                                                                              |                                                                                                              |                                                                                                                                                                                                                                                                                                                                                                                                                                                                                                                                                                                                                                                                                                                                                                       |



|                                                                                                                                                                                                                                                                                                                                                                                                                                                                                                                                               |           |                                                              |                                                              |                                                                                                                                                                                                                                                                                                           |
|-----------------------------------------------------------------------------------------------------------------------------------------------------------------------------------------------------------------------------------------------------------------------------------------------------------------------------------------------------------------------------------------------------------------------------------------------------------------------------------------------------------------------------------------------|-----------|--------------------------------------------------------------|--------------------------------------------------------------|-----------------------------------------------------------------------------------------------------------------------------------------------------------------------------------------------------------------------------------------------------------------------------------------------------------|
| EPI_ISL_8766816, EPI_ISL_8766817, EPI_ISL_8766818, EPI_ISL_8766819, EPI_ISL_8766820, EPI_ISL_8766821, EPI_ISL_8766822, EPI_ISL_8766823, EPI_ISL_8766824, EPI_ISL_8766825, EPI_ISL_8766826, EPI_ISL_8766827, EPI_ISL_8766828, EPI_ISL_8766876, EPI_ISL_8767061, EPI_ISL_8767062, EPI_ISL_8767063, EPI_ISL_8767064, EPI_ISL_8767626, EPI_ISL_8768614, EPI_ISL_8768615, EPI_ISL_8768616, EPI_ISL_8768617, EPI_ISL_8768889, EPI_ISL_8768890, EPI_ISL_8768891, EPI_ISL_8768892, EPI_ISL_8768893, EPI_ISL_8768894, EPI_ISL_8768895, EPI_ISL_8768896 | see above | Shanghai Municipal Center for Disease Control and Prevention | Shanghai Municipal Center for Disease Control and Prevention | Wang,W.                                                                                                                                                                                                                                                                                                   |
| EPI_ISL_8824344, EPI_ISL_8824350                                                                                                                                                                                                                                                                                                                                                                                                                                                                                                              |           | Emory University School of Medicine                          | Emory University School of Medicine                          | Key,A., Waggoner,J., Ali,I.M., Piantadosi,A.L. and Collins,M.                                                                                                                                                                                                                                             |
| EPI_ISL_9004460, EPI_ISL_9004461, EPI_ISL_9004462, EPI_ISL_9004463, EPI_ISL_9004464                                                                                                                                                                                                                                                                                                                                                                                                                                                           |           | UNIVERSITY OF HYDERABAD                                      | UNIVERSITY OF HYDERABAD                                      | Maisnam,D. and Musturi,V.                                                                                                                                                                                                                                                                                 |
| EPI_ISL_9004465, EPI_ISL_9004466, EPI_ISL_9004467, EPI_ISL_9004468, EPI_ISL_9004469                                                                                                                                                                                                                                                                                                                                                                                                                                                           |           | Guangzhou Center for Disease Control and Prevention          | Guangzhou Center for Disease Control and Prevention          | Su,W., Cao,Y. and Lu,W.                                                                                                                                                                                                                                                                                   |
| EPI_ISL_9004470                                                                                                                                                                                                                                                                                                                                                                                                                                                                                                                               |           | Guangzhou Center for Disease Control and Prevention          | Guangzhou Center for Disease Control and Prevention          | Su,W., Jjiang,L. and Lu,W.                                                                                                                                                                                                                                                                                |
| EPI_ISL_9103208, EPI_ISL_9103209, EPI_ISL_9103210, EPI_ISL_9103211                                                                                                                                                                                                                                                                                                                                                                                                                                                                            |           | Chinese Academy of Sciences                                  | Chinese Academy of Sciences                                  | lihong,H.                                                                                                                                                                                                                                                                                                 |
| EPI_ISL_9152287, EPI_ISL_9152288, EPI_ISL_9152289, EPI_ISL_9152290, EPI_ISL_9152291, EPI_ISL_9152292, EPI_ISL_9437081, EPI_ISL_9437082                                                                                                                                                                                                                                                                                                                                                                                                        |           | Secretaria de Salud                                          | Secretaria de Salud                                          | Wong-Arambula,C.E., Rodriguez-Maldonado,A.P., Fuentes-Cuevas,C.H., Duran-Ayala,D., Torres-Rodriguez,Mdl.L., Rivero-Arredondo,V., Serrano-Gutierrez,S., Aparicio-Antonio,M., Rosales-Jimenez,C., del Mazo-Lopez,J.C., Hernandez-Rivas,L., Lopez-Martinez,I., Ramirez-Gonzalez,J.E. and Vazquez-Pichardo,M. |
| EPI_ISL_9636328, EPI_ISL_9636329, EPI_ISL_9636330, EPI_ISL_9636331, EPI_ISL_9636332                                                                                                                                                                                                                                                                                                                                                                                                                                                           |           | University Of Hyderabad                                      | UNIVERSITY OF HYDERABAD                                      | Maisnam,D. and Musturi,V.                                                                                                                                                                                                                                                                                 |
| EPI_ISL_9711778, EPI_ISL_9711914, EPI_ISL_9711959, EPI_ISL_9712018, EPI_ISL_9712019, EPI_ISL_9712020, EPI_ISL_9712021, EPI_ISL_9712022, EPI_ISL_9712023, EPI_ISL_9712024, EPI_ISL_9713936, EPI_ISL_9713937, EPI_ISL_9713980, EPI_ISL_9713981, EPI_ISL_9713982, EPI_ISL_9713983, EPI_ISL_9713984, EPI_ISL_9713985, EPI_ISL_9713986, EPI_ISL_9713987, EPI_ISL_9713988, EPI_ISL_9713989, EPI_ISL_9713990, EPI_ISL_9713991                                                                                                                        | see above | National Institute of Virology                               | National Institute of Virology                               | Yadav,P.D.                                                                                                                                                                                                                                                                                                |
| EPI_ISL_9713992                                                                                                                                                                                                                                                                                                                                                                                                                                                                                                                               |           | Adolfo Lutz Institute                                        | Adolfo Lutz Institute                                        | Cunha,M.S., de Moura Coletti,T., Guerra,J.M., Ponce,C.C., Fernandes,N.C.C.A., Resio,R.A., Claro,I.M., Salles,F., Lima Neto,D.F. and Sabino,E.                                                                                                                                                             |
| EPI_ISL_9768996, EPI_ISL_9769066                                                                                                                                                                                                                                                                                                                                                                                                                                                                                                              |           | Fundacion Universitaria Autonoma de las Americas             | Fundacion Universitaria Autonoma de las Americas             | Rojas-Gallardo,D.M., Restrepo-Chica,J., Key,A., Acosta,A., Castrillon-Spitia,J.D., Tabares-Villa,F.A., Trujillo,A.M., Jjimenez-Posada,E.V., Martinez-Gutierrez,M., Ruiz-Saenz,J., Waggoner,J., Collins,M.H., Piantadosi,A. and Cardona-Ospina,J.A.                                                        |
| EPI_ISL_9845835, EPI_ISL_9845836, EPI_ISL_9882074, EPI_ISL_9882077, EPI_ISL_9935327, EPI_ISL_9935714, EPI_ISL_9936221, EPI_ISL_9988597, EPI_ISL_9988598                                                                                                                                                                                                                                                                                                                                                                                       |           | National Institute of Virology                               | National Institute of Virology                               | Yadav,P.D.                                                                                                                                                                                                                                                                                                |
